# Supplementary material for: Combinatorial synthesis of substituted pyrazolo-fused quinazolines by the Rh(iii)-catalyzed [5 + 1] annulation of phenyl-1H-pyrazol-5-amine with alkynoates and alkynamides
Source: Royal Society of Chemistry journal article supplement (doi:10.1039/d4ob00516c), 2024-01-01
Supplement: d4ob00516c1.pdf [file d4ob00516c1.pdf]

## Supplementary Information

# Combinatorial Synthesis of Substituted Pyrazolo-Fused Quinazolines by the Rh(III)-Catalyzed [5+1] Annulation of Phenyl-1H-pyrazol-5-amine with Alkynoates and Alkynamide

Wei-Jung Chiu<sup>a</sup>, Ting-Yen Chu<sup>b</sup> and Chung-Ming Sun<sup>a,b\*</sup>

<sup>a</sup>*Department of Applied Chemistry, Laboratory of Combinatorial Drug Design, 1001 Ta-Hseuh Road, National Yang-Ming Chiao-Tung University, Hsinchu 300-10, Taiwan*

<sup>b</sup>*Department of Medicinal and Applied Chemistry, Kaohsiung Medical University, 100, Shih-Chuan 1st Road, Kaohsiung 807-08, Taiwan*

E-mail: cmsun@nycu.edu.tw

### Table of contents

|                                                        |     |
|--------------------------------------------------------|-----|
| 1. General Information .....                           | S2  |
| 2. Analytical Methods .....                            | S2  |
| 3. General procedure for synthesis of <b>1</b> .....   | S2  |
| 4. General procedure for synthesis of <b>2</b> .....   | S2  |
| 5. General procedure for synthesis of <b>3aa</b> ..... | S3  |
| 6. Mechanism Experiments .....                         | S3  |
| 7. Characterization Data of <b>3aa-3al</b> .....       | S11 |
| 8. Spectral Data of <b>3aa-3al</b> .....               | S20 |

## 1. General Information

All reactions were carried out in oven-dried round bottoms. All other chemicals were also purchased from Sigma-Aldrich and TCI and were used as received. All the solvents were distilled before use.

## 2. Analytical Methods

Analytical thin-layer chromatography (TLC) was performed using 0.25mm silica gel coated plates. Flash chromatography was performed using the indicated solvent and silica gel 60 (230-400 mesh).  $^1\text{H}$  NMR and  $^{13}\text{C}$  NMR spectra were recorded on 400 MHz spectrometers. Chemical shifts are reported in parts per million (ppm) on the  $\delta$  scale from an internal standard (TMS). High resolution mass spectra (HRMS) were recorded in ESI mode using TOF mass spectrometer.

## 3. General procedure for synthesis of 1

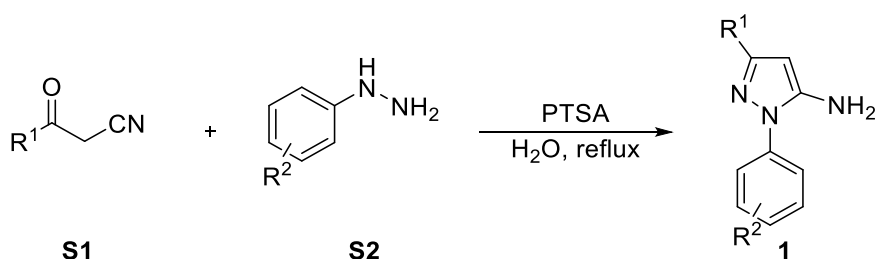

A round bottom flask was charged with  $\beta$ -ketonitrile (1 equiv.), aryl hydrazine (1.1 equiv.) and PTSA (0.1 equiv.) in water, which was heated at 105 °C for 3-6 h. The reaction was monitored by TLC. After disappearance of the starting material, the reaction mixture was then cooled to room temperature and was extracted with ethyl acetate trice. The combined organic layer was washed with brine solution, dried over anhydrous  $\text{MgSO}_4$ , then the residue was separated by silica gel chromatography using 20% ethyl acetate in hexane as eluent ( $R_f = 0.18$ ) to obtain the desired 5-amino-4-arylpyrazoles in 72-90% yield.

## 4. General procedure for synthesis of 2

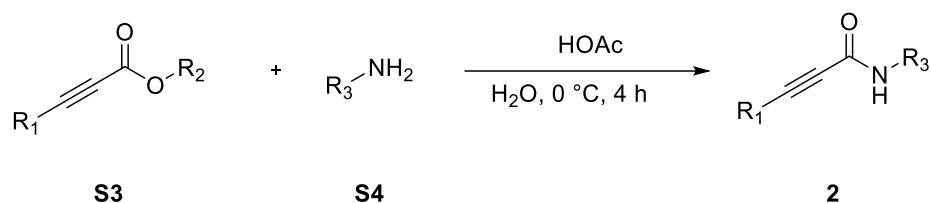

To a solution of alkyl amine **S4** (1.2 equiv.) in 5 mL, alkynyl ester **S3** (1 equiv.) was added dropwise at 0 °C for 30 min. The mixture was stirred for 2 h at 0 °C, and then a few drops of acetic acid were added. The mixture was stirred for another 2h and saturated with NaCl, followed by extraction with ethyl acetate (3 × 10 mL), dried over MgSO<sub>4</sub>, then the residue was separated by silica gel chromatography with hexane/ethyl acetate (1:1, R<sub>f</sub> = 0.3) to obtain the desired alkynyl amide **2** in 66-78% yield.

### 5. General procedure for synthesis of 3aa

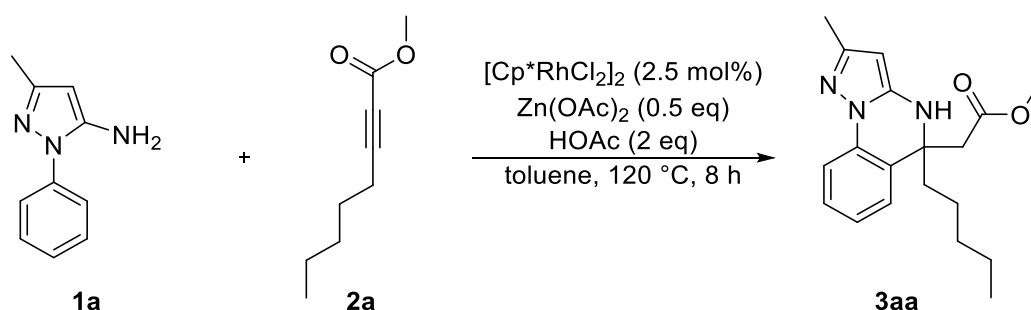

To an oven-dried 25 mL round bottom equipped with magnetic stir bar, **1a** (200 mg, 1.16 mmol), methyl oct-2-ynoate **2a** (232 mg, 1.5 mmol), [Cp\*RhCl<sub>2</sub>]<sub>2</sub> (17 mg, 2.5 mol%), Zn(OAc)<sub>2</sub> (106 mg, 0.58 mmol) and HOAc (139 mg, 2.32 mmol) in toluene (6.0 mL) was stirred in 120 °C oil bath for 8 h under air atmosphere. After removal of the solvent under reduced pressure, purification was performed by flash column chromatography on silica gel with hexane/ethyl acetate (3:1, R<sub>f</sub> = 0.25) as eluent to afford corresponding products.

### 6. Mechanism Experiments

Deuterium exchange

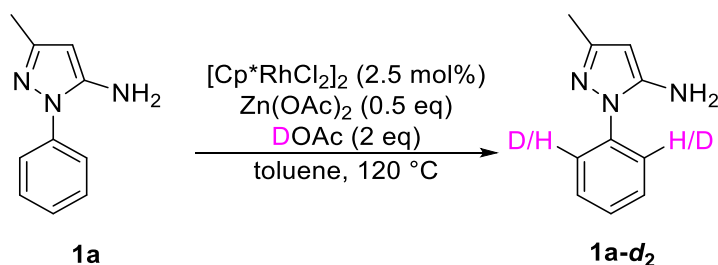

(A) An oven-dried 25 mL round bottom is equipped with 3-methyl-1-phenyl-1H-pyrazol-5-amine **1a** (50 mg, 0.29 mmol.), [Cp\*RhCl<sub>2</sub>]<sub>2</sub> (4.4 mg, 2.5 mol%), Zn(OAc)<sub>2</sub> (27 mg, 0.15 mmol) and DOAc (34 mg, 0.57 mmol) in toluene (2 mL). The reaction mixture was stirred in 120 °C oil bath for 30 mins. The solvent was evaporated and the crude product obtained was purified

by silica gel column chromatography with hexane/ethyl acetate (1:3,  $R_f = 0.22$ ). The H/D exchange was found to be 23 % at the protons attached to C-2' and C-6' in the recovered **1a-d<sub>2</sub>**.

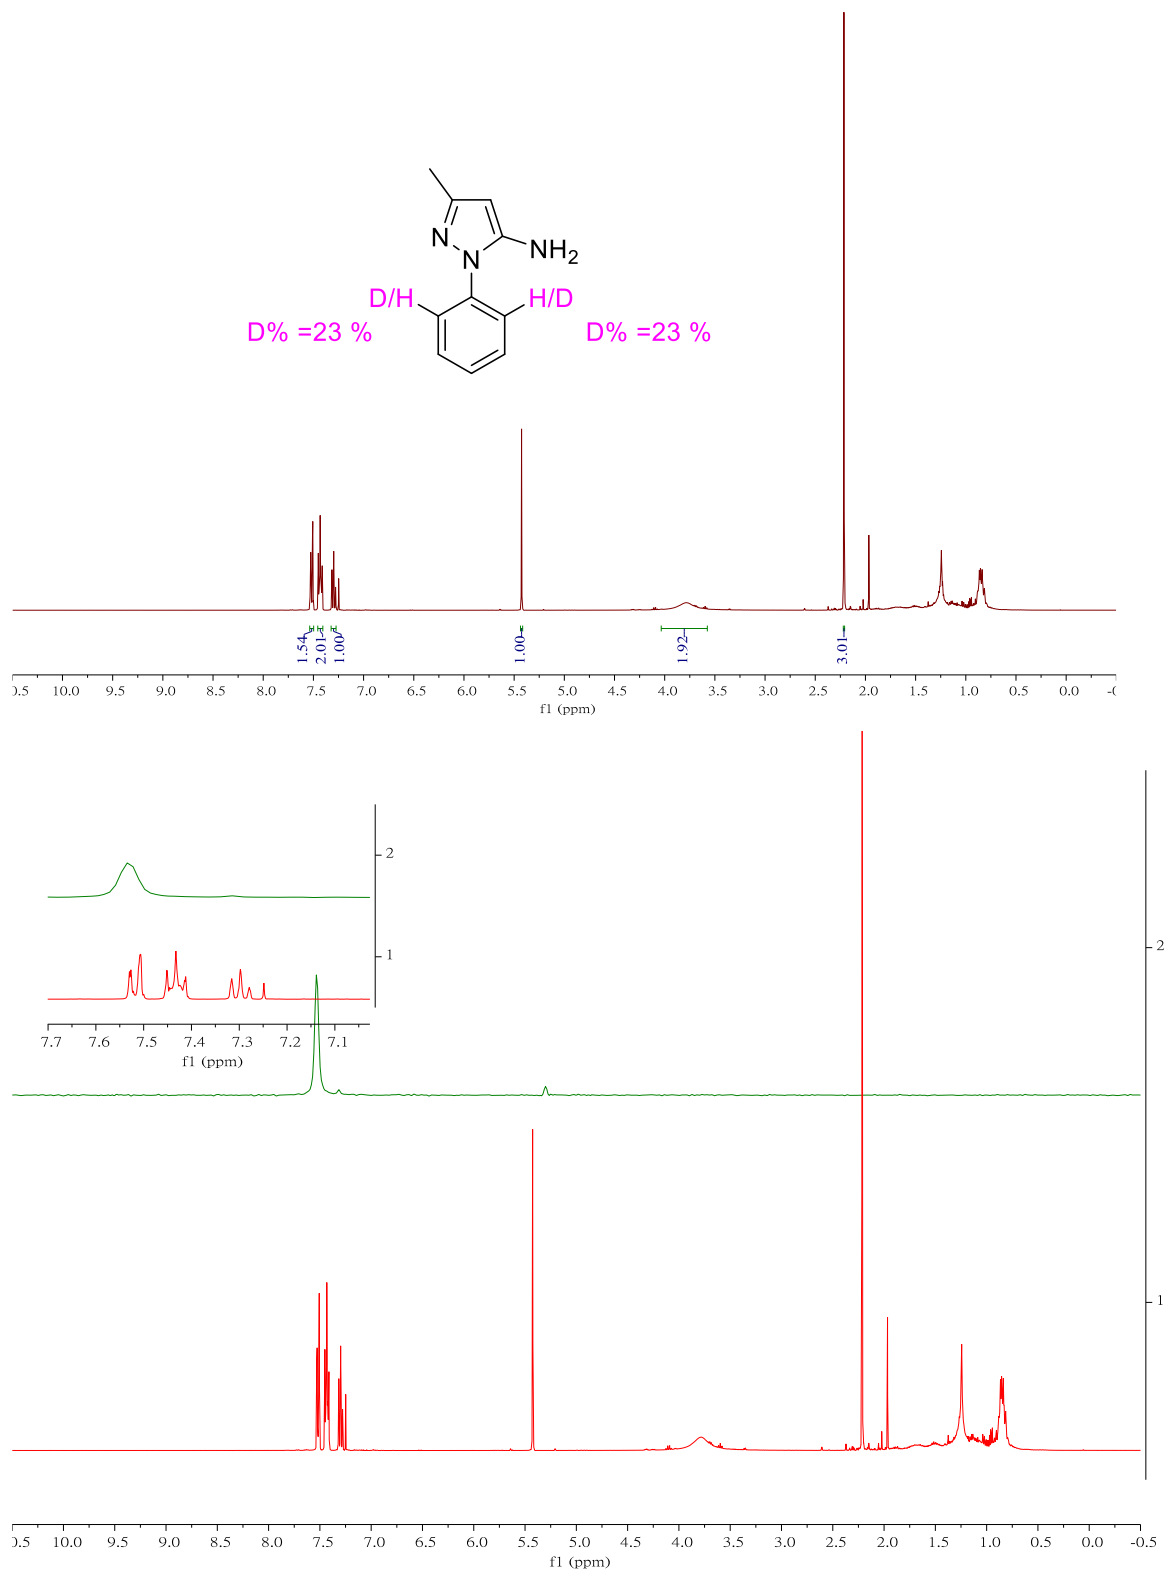

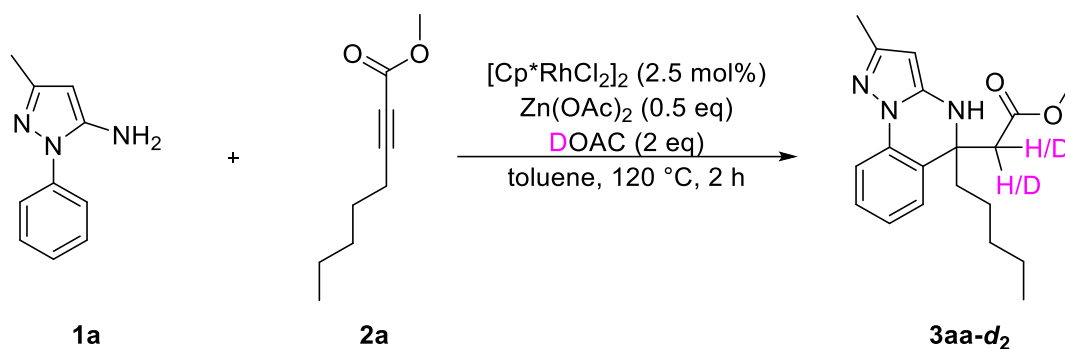

(B) An oven-dried 25 mL round bottom is equipped with 3-methyl-1-phenyl-1H-pyrazol-5-amine **1a** (50 mg, 0.29 mmol), methyl oct-2-ynoate **2a** (52 mg, 0.34 mmol),  $[Cp^*RhCl_2]_2$  (4.4 mg, 2.5 mol%),  $Zn(OAc)_2$  (27 mg, 0.15 mmol) and DOAc (34 mg, 0.57 mmol) in toluene (2 mL). The reaction mixture was stirred in 120 °C oil bath for 30 mins. The solvent was evaporated and the crude product obtained was purified by silica gel column chromatography with hexane/ethyl acetate (1:3,  $R_f = 0.25$ ). The H/D exchange was found to be 0 % at the alpha-carbon proton in the recovered **3aa-d<sub>2</sub>**.

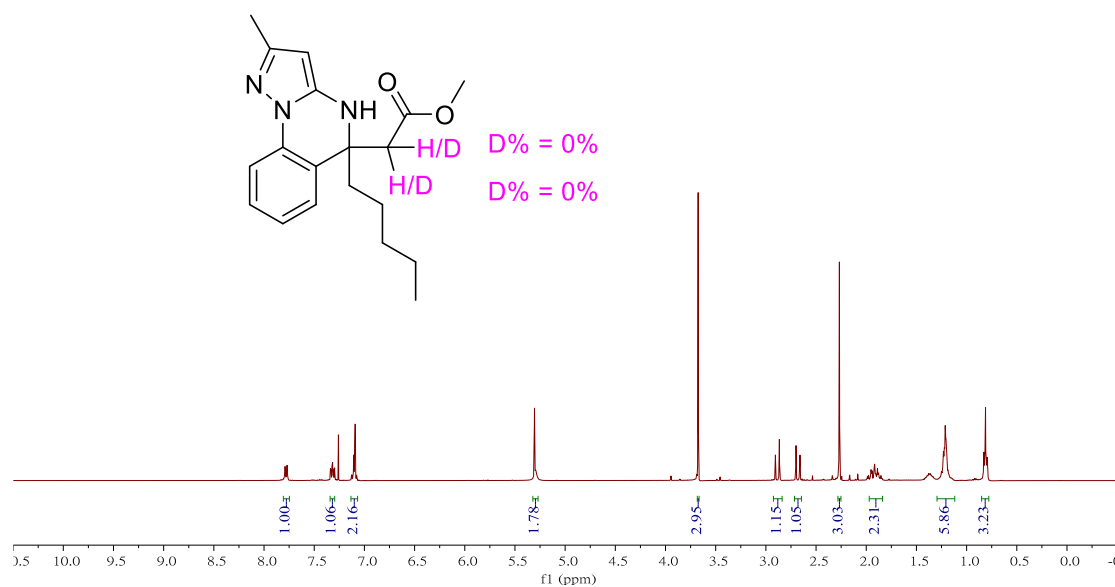

(2) Competition KIE study

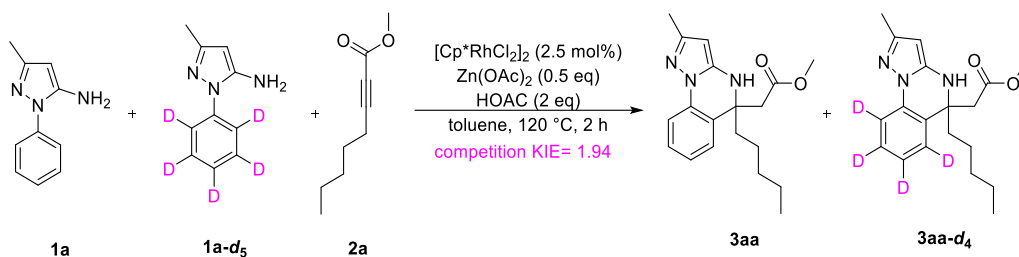

An oven-dried 25 mL round bottom containing **1a** (25 mg, 0.14 mmol) and **1a-d<sub>5</sub>** (25 mg, 0.14 mmol), methyl oct-2-ynoate **2a** (56.1 mg, 0.36 mmol),  $[Cp^*RhCl_2]_2$  (4.4 mg, 2.5 mol%),  $Zn(OAc)_2$  (26 mg, 0.14 mmol) and HOAc (34 mg, 0.57 mmol) in toluene (2 mL). The reaction mixture was stirred in 120 °C oil bath for 2 h under air atmosphere. After removal of the solvent under reduced pressure, purification was performed by flash column chromatography on silica gel with petroleum ether/ethyl acetate (3:1,  $R_f = 0.25$ ) as eluent to afford the corresponding products. The KIE value was determined using  $^1H$  NMR.

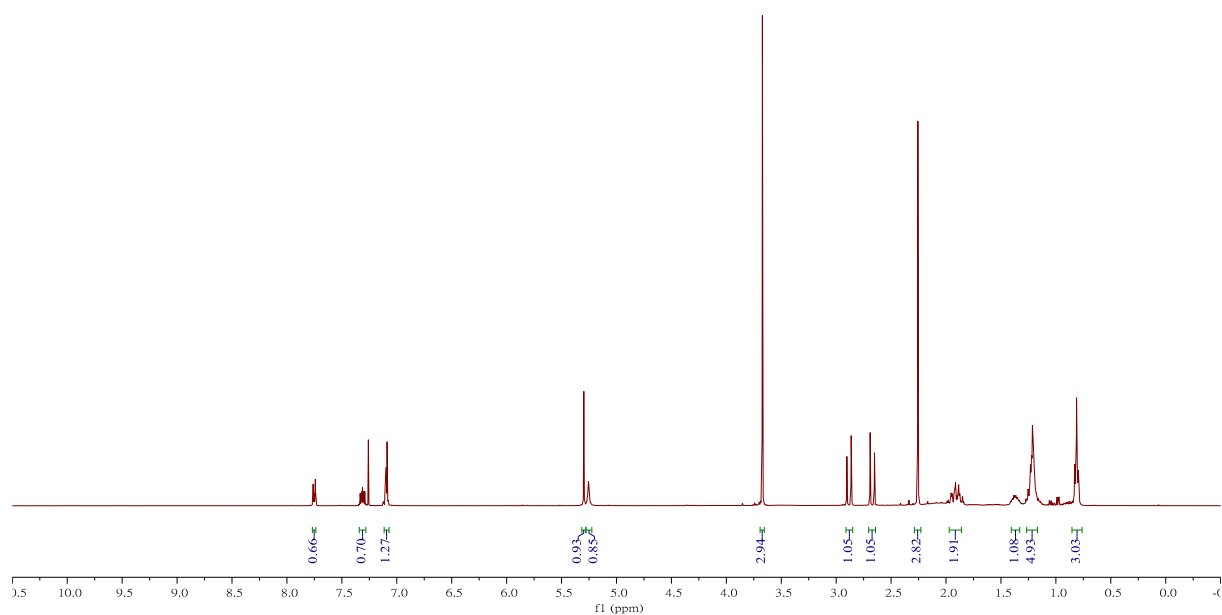

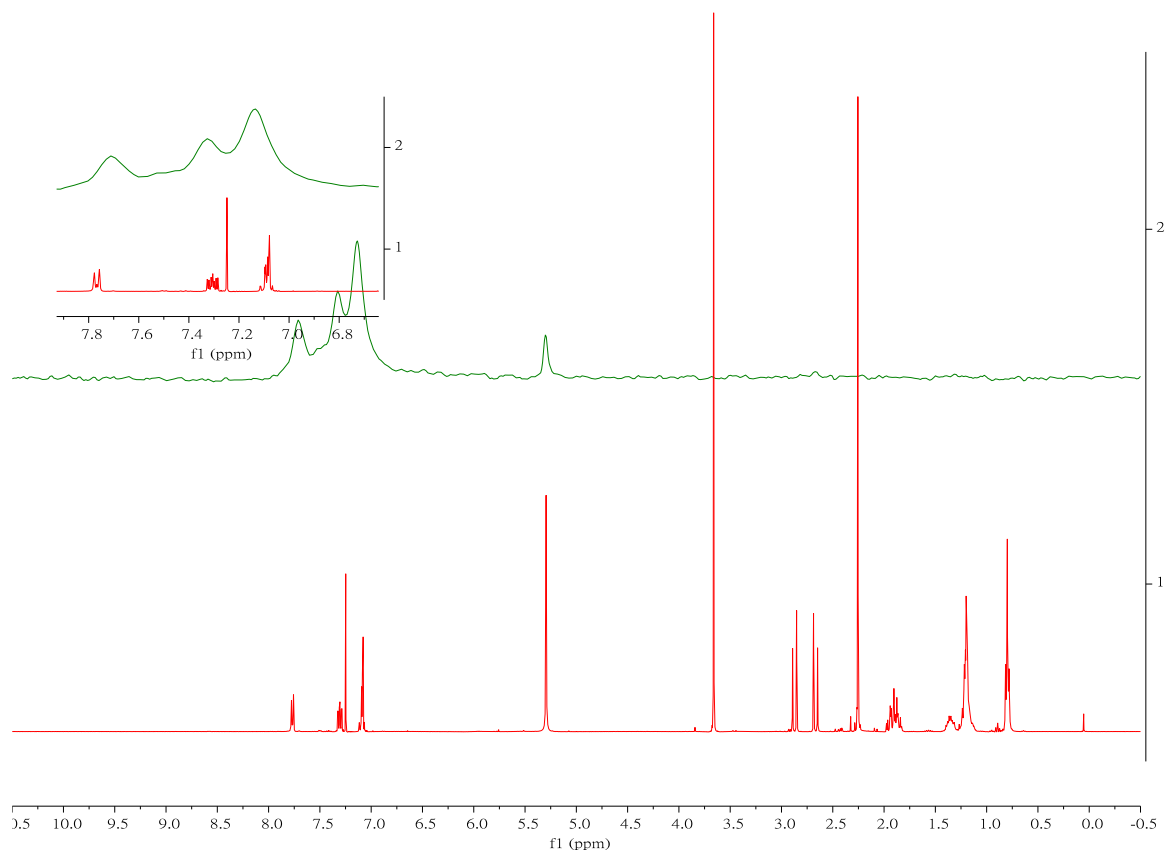

### (3) Parallel KIE study

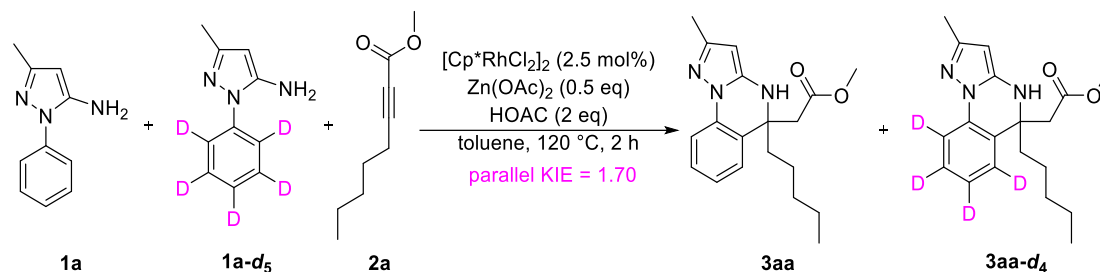

Two separated oven-dried 25 mL round bottom containing **1a** (25 mg, 0.14 mmol) or **1a-d<sub>5</sub>** (25 mg, 0.14 mmol), methyl oct-2-ynoate **2a** (25 mg, 0.16 mmol), [Cp\*RhCl<sub>2</sub>]<sub>2</sub> (2.2 mg, 2.5 mol%), Zn(OAc)<sub>2</sub> (13 mg, 0.07 mmol) and HOAc (18.6 mg, 0.31 mmol) in toluene (2 mL). The reaction mixture was stirred in 120 °C oil bath for 2 h under air atmosphere. Then the two separated reaction mixture was transferred to 25-mL round bottom flask and washed with CH<sub>2</sub>Cl<sub>2</sub> (2 mL × 3). After removal of the solvent under reduced pressure, purification was performed by flash column chromatography on silica gel with petroleum ether/ethyl acetate (3:1, R<sub>f</sub> = 0.25) as eluent to afford the corresponding products. The KIE value was determined using <sup>1</sup>H NMR.

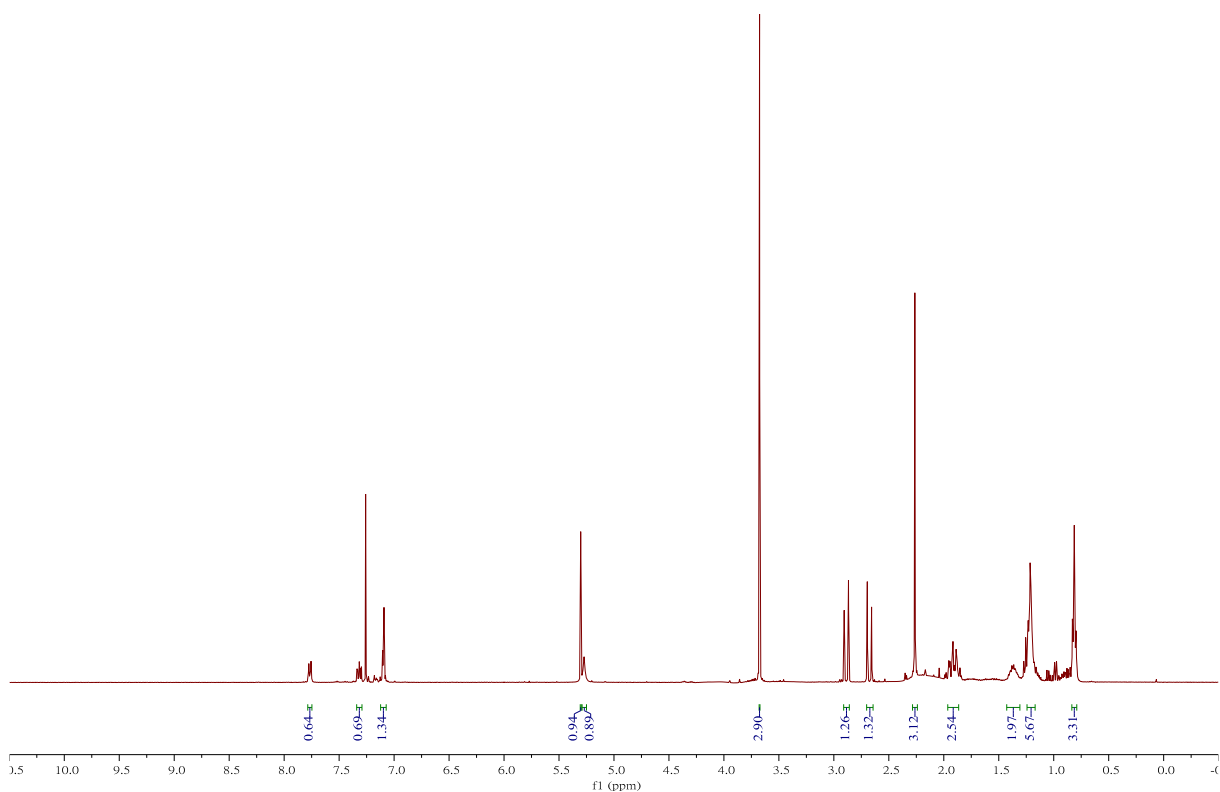

#### (4) Intermolecular competition experiments

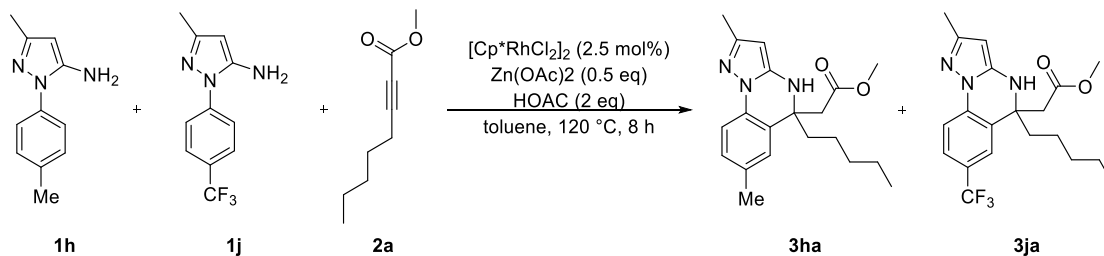

An oven-dried 25 mL round bottom containing **1h** (25 mg, 0.14 mmol) and **1j** (25 mg, 0.14 mmol), methyl oct-2-ynoate **2a** (56.1 mg, 0.18 mmol),  $[\text{Cp}^*\text{RhCl}_2]_2$  (4.4 mg, 2.5 mol%),  $\text{Zn}(\text{OAc})_2$  (26 mg, 0.14 mmol) and HOAc (17 mg, 0.28 mmol) in toluene (2 mL). The reaction mixture was stirred in 120 °C oil bath for 8 h under air atmosphere. After removal of the solvent under reduced pressure, purification was performed by flash column chromatography on silica gel with petroleum ether/ethyl acetate (3:1,  $R_f = 0.25$ ) as eluent to afford the **3ha** and **3ja** in 42% and 31% yields respectively.



(5) The synthesis of **6aa**

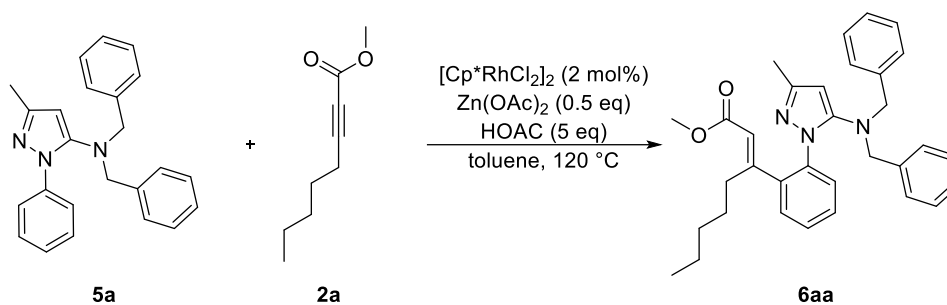

To an oven-dried 25 mL round bottom equipped with magnetic stir bar, **5a** (100 mg, 0.28 mmol), methyl oct-2-ynoate **2a** (65 mg, 0.42 mmol),  $[\text{Cp}^*\text{RhCl}_2]_2$  (17 mg, 2.5 mol%),  $\text{Zn}(\text{OAc})_2$  (26 mg, 0.14 mmol) and HOAc (85 mg, 1.42 mmol) in toluene (6.0 mL) was stirred in 120 °C oil bath for 8 h under air atmosphere. After removal of the solvent under reduced pressure, purification was performed by flash column chromatography on silica gel with hexane/ethyl acetate (20:1,  $R_f = 0.45$ ) as eluent to afford corresponding product **6aa** in 66% yield.

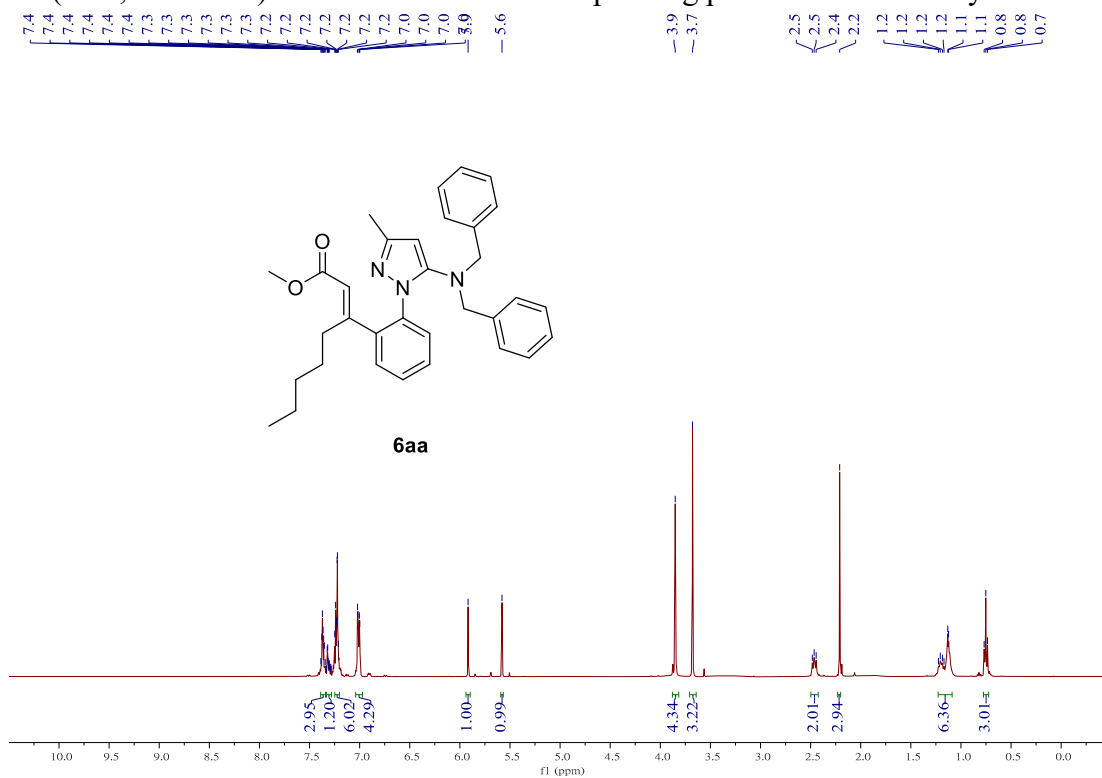

$^1\text{H}$  spectrum (400 MHz) of compound **6aa** in  $\text{CDCl}_3$

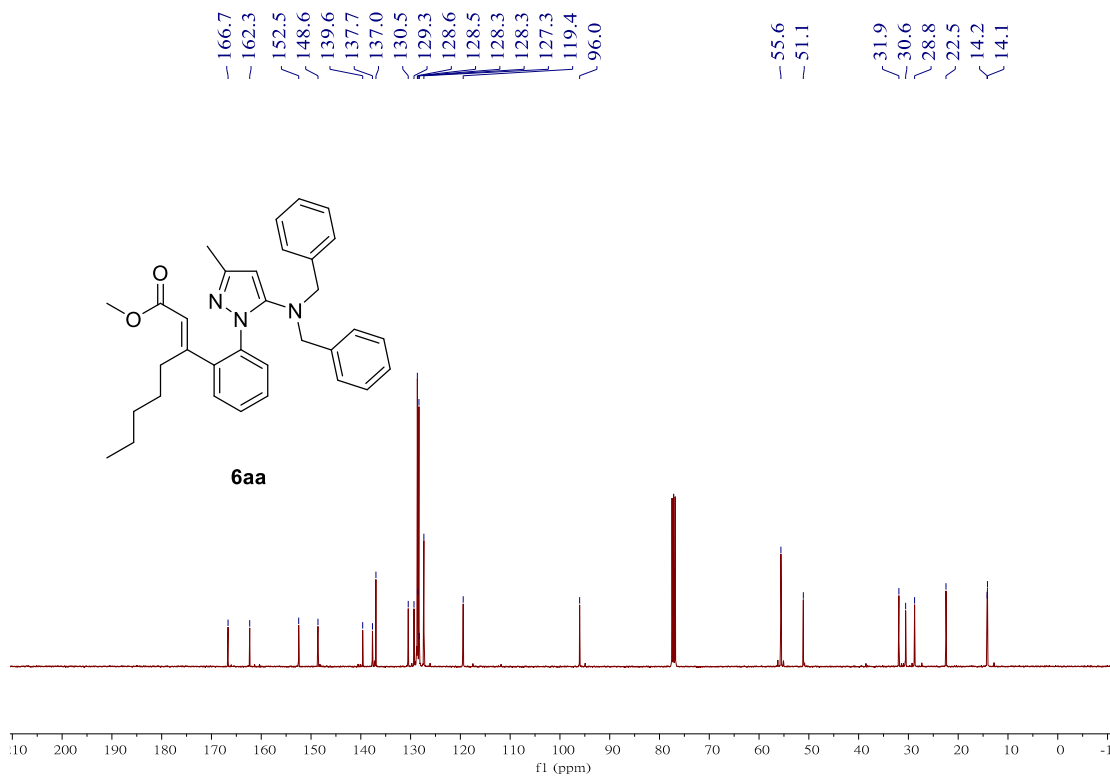

$^{13}\text{C}\{^1\text{H}\}$  spectrum (101 MHz) of compound **6aa** in  $\text{CDCl}_3$

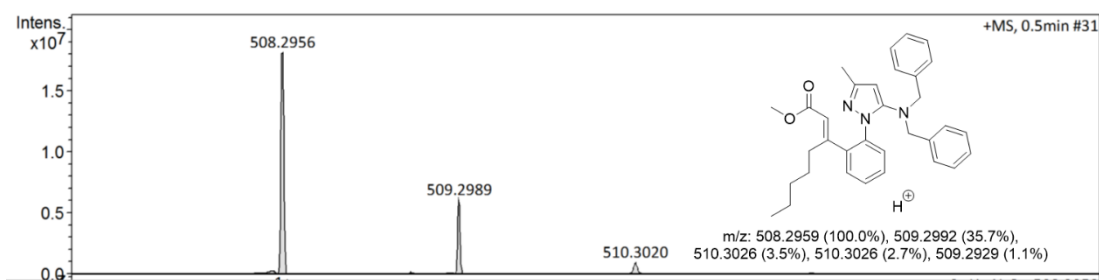

### Display Report

| Meas. m/z | # | Ion Formula                                                   | m/z      | err [ppm] | mSigma | # Sigma | Score  | rdb  | e <sup>-</sup> Conf | N-Rule | Adduct |
|-----------|---|---------------------------------------------------------------|----------|-----------|--------|---------|--------|------|---------------------|--------|--------|
| 508.2956  | 1 | C <sub>33</sub> H <sub>38</sub> N <sub>3</sub> O <sub>2</sub> | 508.2959 | 0.4       | 21.7   | 1       | 100.00 | 16.5 | even                | ok     | M+H    |

HRMS Mass (ESI) spectrum of compound **6aa**

## 7. Characterization Data of 3aa-3ak

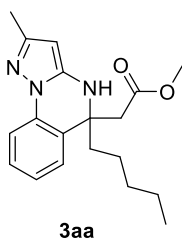

### ethyl 2-(2,5-dimethyl-4,5-dihydropyrazolo[1,5-a]quinazolin-5-yl)acetate (3aa)

Flash chromatography for purification: hexane/ethyl acetate = 3:1. R<sub>f</sub> = 0.25. Yellow solid; mp 183–185 °C. Yield = 161.0 mg; (82%); <sup>1</sup>H NMR (400 MHz, CDCl<sub>3</sub>) δ 7.73 (d, *J* = 8.4 Hz, 1H), 7.32 – 7.26 (m, 1H), 7.08 (m, 2H), 5.28 (s, 1H), 5.23 (s, 1H), 3.66 (s, 3H), 2.87 (d, *J* = 15.7 Hz, 1H), 2.65 (d, *J* = 15.7 Hz, 1H), 2.24 (s, 3H), 1.89 (m, 2H), 1.42 – 1.28 (m, 1H), 1.27 – 1.12 (m, 5H), 0.81 (t, *J* = 6.8 Hz, 3H). <sup>13</sup>C NMR (101 MHz, CDCl<sub>3</sub>) δ 171.8, 151.3, 144.1, 134.3, 128.7, 125.2, 124.6, 124.1, 114.5, 87.7, 57.7, 51.9, 44.8, 38.9, 32.1, 23.9, 22.6, 14.3, 14.1. HRMS (ESI, *m/z*) calculated for C<sub>19</sub>H<sub>26</sub>N<sub>3</sub>O<sub>2</sub> (M + H)<sup>+</sup>: 328.2020, Found: 328.2019.

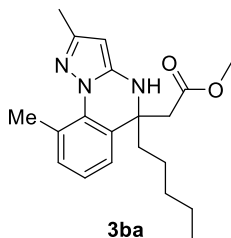

### methyl 2-(2,9-dimethyl-5-pentyl-4,5-dihydropyrazolo[1,5-a]quinazolin-5-yl)acetate (3ba)

Flash chromatography for purification: hexane/ethyl acetate = 3:1. R<sub>f</sub> = 0.25. Yellow liquid; Yield = 176.6 mg; (86%); <sup>1</sup>H NMR (400 MHz, CDCl<sub>3</sub>) δ 7.15-7.10 (m, 1H), 7.00 (t, *J* = 7.6 Hz, 1H), 6.96-6.92 (m, 1H), 5.37 (s, 1H), 5.15 (s, 1H), 3.66 (s, 3H), 2.82-2.71 (m, 4H), 2.60 (d, *J* = 15.6 Hz, 1H), 2.24 (s, 3H), 2.00-1.90 (m, 1H), 1.86-1.76 (m, 1H), 1.32-1.26 (m, 1H), 1.24-1.13 (m, 5H), 0.81 (t, *J* = 6.8 Hz, 3H). <sup>13</sup>C NMR (101 MHz, CDCl<sub>3</sub>) δ 172.0, 149.4, 145.4, 133.1, 132.6, 128.0, 127.4, 123.9, 122.3, 88.4, 58.2, 51.8, 43.5, 37.7, 32.2, 23.9, 22.6, 22.6, 14.5, 14.1. HRMS (ESI, *m/z*) calculated for C<sub>20</sub>H<sub>28</sub>N<sub>3</sub>O<sub>2</sub> (M + H)<sup>+</sup>: 342.2176, Found: 342.2174.

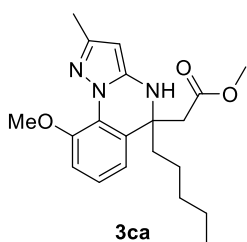

### methyl 2-(9-methoxy-2-methyl-5-pentyl-4,5-dihydropyrazolo[1,5-a]quinazolin-5-yl)acetate (3ca)

Flash chromatography for purification: hexane/ethyl acetate = 3:1. R<sub>f</sub> = 0.25. Yellow liquid; Yield = 169.3 mg; (79%); <sup>1</sup>H NMR (400 MHz, CDCl<sub>3</sub>) δ 7.11 – 7.03 (m, 1H), 6.96 (d, *J* = 9.2 Hz, 1H), 6.73 (d, *J* = 9.2 Hz, 1H), 5.37 (s, 1H), 5.19 (s, 1H), 3.94 (s, 3H), 3.65 (s, 3H), 2.77 (d, *J* = 15.6 Hz, 1H), 2.62 (d, *J* = 15.6 Hz, 1H), 2.28 (s, 3H), 1.86 (m, 2H), 1.34 (m, 1H), 1.19 (m, 5H), 0.80 (t, *J* = 6.8 Hz, 3H). <sup>13</sup>C NMR (101 MHz, CDCl<sub>3</sub>) δ 171.9, 150.5, 149.3, 145.4, 129.3, 124.7, 124.3, 116.9, 112.9, 88.5, 58.2, 56.9, 51.9, 43.5, 38.1, 32.1, 23.8, 22.6, 14.7, 14.1. HRMS (ESI, *m/z*) calculated for C<sub>20</sub>H<sub>28</sub>N<sub>3</sub>O<sub>3</sub> (M + H)<sup>+</sup>: 358.2125, Found: 358.2127.

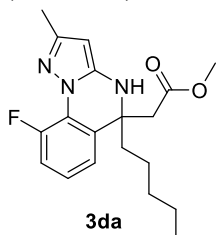

### methyl 2-(9-fluoro-2-methyl-5-pentyl-4,5-dihydropyrazolo[1,5-a]quinazolin-5-yl)acetate (3da)

Flash chromatography for purification: hexane/ethyl acetate = 3:1. R<sub>f</sub> = 0.25. Yellow liquid; Yield = 149.1 mg; (72%); <sup>1</sup>H NMR (400 MHz, CDCl<sub>3</sub>) δ 7.72 (dd, *J* = 8.9, 5.1 Hz, 1H), 7.02 (td, *J* = 8.7, 2.7 Hz, 1H), 6.81 (dd, *J* = 9.4, 2.6

Hz, 1H), 5.30 (s, 1H), 5.23 (s, 1H), 3.68 (s, 3H), 2.87 (d,  $J = 15.7$  Hz, 1H), 2.64 (d,  $J = 15.7$  Hz, 1H), 2.24 (s, 3H), 1.93-1.84 (m, 2H), 1.39 (q,  $J = 8.3, 7.6$  Hz, 1H), 1.29 – 1.14 (m, 5H), 0.82 (t,  $J = 6.6$  Hz, 3H).  $^{13}\text{C}$  NMR (101 MHz,  $\text{CDCl}_3$ )  $\delta$  171.6, 151.3, 143.7, 127 (d,  $J = 6.6$  Hz), 116.1 (d,  $J = 7.4$  Hz), 115.5 (d,  $J = 22.9$  Hz), 111.8 (d,  $J = 24.8$  Hz), 88.0, 57.8, 52.0, 44.4, 38.8, 32.0, 23.9, 22.6, 14.3, 14.1.  $^{19}\text{F}\{^1\text{H}\}$  NMR (376 MHz,  $\text{CDCl}_3$ )  $\delta$  121.4. HRMS (ESI,  $m/z$ ) calculated for  $\text{C}_{19}\text{H}_{25}\text{FN}_3\text{O}_2$  ( $\text{M} + \text{H}$ ) $^+$ : 346.1925, Found: 346.1925.

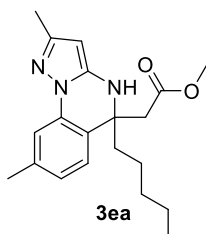

**methyl 2-(2,8-dimethyl-5-pentyl-4,5-dihydropyrazolo[1,5-a]quinazolin-5-yl)acetate (3ea)**

Flash chromatography for purification: hexane/ethyl acetate = 3:1.  $R_f = 0.25$ . Yellow liquid; Yield= 167.9 mg; (82%);  $^1\text{H}$  NMR (400 MHz,  $\text{CDCl}_3$ )  $\delta$  7.57 (s, 1H), 6.97-6.93 (d,  $J = 7.92$  Hz, 1H), 6.90-6.86 (d,  $J = 7.96$  Hz, 1H), 5.27 (s, 1H), 5.24 (s, 1H), 3.64 (s, 3H), 2.83 (d,  $J = 15.6$  Hz, 1H), 2.64 (d,  $J = 15.7$  Hz, 1H), 2.33 (s, 3H), 2.23 (s, 3H), 1.98-1.76 (m, 2H), 1.36 (m, 1H), 1.18 (m, 5H), 0.79 (t,  $J = 6.5$  Hz, 3H).  $^{13}\text{C}$  NMR (101 MHz,  $\text{CDCl}_3$ )  $\delta$  171.9, 151.2, 144.3, 138.8, 133.9, 124.9, 124.5, 122.3, 114.9, 87.7, 57.5, 51.8, 44.9, 38.9, 32.0, 23.9, 22.5, 21.2, 14.2, 14.1. HRMS (ESI,  $m/z$ ) calculated for  $\text{C}_{20}\text{H}_{28}\text{N}_3\text{O}_2$  ( $\text{M} + \text{H}$ ) $^+$ : 342.2176, Found: 342.2176.

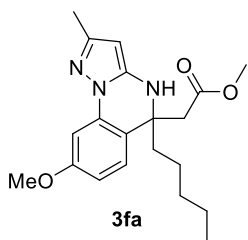

**methyl 2-(8-methoxy-2-methyl-5-pentyl-4,5-dihydropyrazolo[1,5-a]quinazolin-5-yl)acetate (3fa)**

Flash chromatography for purification: hexane/ethyl acetate = 3:1.  $R_f = 0.25$ . Yellow solid; mp 193–196 °C. Yield= 180.0 mg; (84%);  $^1\text{H}$  NMR (400 MHz,  $\text{CDCl}_3$ )  $\delta$  7.33 (s, 1H), 6.96 (d,  $J = 8.6$  Hz, 1H), 6.64 (d,  $J = 10.3$  Hz, 1H), 5.29 (s, 2H), 3.86 (s, 3H), 3.66 (s, 3H), 2.84 (d,  $J = 15.8$  Hz, 1H), 2.64 (d,  $J = 15.7$  Hz, 1H), 2.26 (s, 3H), 1.90-1.83 (m, 2H), 1.39 – 1.29 (m, 1H), 1.20 (m, 5H), 0.80 (t,  $J = 6.5$  Hz, 3H).  $^{13}\text{C}$  NMR (101 MHz,  $\text{CDCl}_3$ )  $\delta$  171.8, 159.9, 151.2, 144.4, 144.4, 125.7, 117.0, 111.3, 98.9, 87.7, 57.4, 55.7, 51.7, 44.9, 39.0, 31.9, 23.8, 22.5, 14.1, 14.0. HRMS (ESI,  $m/z$ ) calculated for  $\text{C}_{20}\text{H}_{28}\text{N}_3\text{O}_3$  ( $\text{M} + \text{H}$ ) $^+$ : 358.2125, Found: 358.2125.

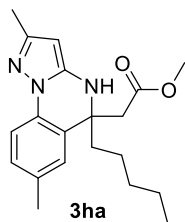

**methyl 2-(2,7-dimethyl-5-pentyl-4,5-dihydropyrazolo[1,5-a]quinazolin-5-yl)acetate (3ha)**

Flash chromatography for purification: hexane/ethyl acetate = 3:1.  $R_f = 0.25$ . Yellow liquid; Yield= 163.8 mg; (80%);  $^1\text{H}$  NMR (400 MHz,  $\text{CDCl}_3$ )  $\delta$  7.65 (d,  $J = 8.2$  Hz, 1H), 7.11 (d,  $J = 8.5$  Hz, 1H), 6.87 (s, 1H), 5.28 (s, 1H), 5.24 (s, 1H), 3.67 (s, 3H), 2.86 (d,  $J = 15.7$  Hz, 1H), 2.66 (d,  $J = 15.6$  Hz, 1H), 2.32 (s, 3H), 2.25 (s, 3H), 1.99 – 1.80 (m, 2H), 1.36 (d,  $J = 9.1$  Hz, 1H), 1.21 (m, 6H), 0.81 (t,  $J = 6.8$  Hz, 3H).  $^{13}\text{C}$  NMR (101 MHz,  $\text{CDCl}_3$ )  $\delta$  171.9, 150.9, 143.9, 133.6, 132.0, 129.2, 125.1, 125.1, 114.3, 87.6, 57.7, 51.9, 44.9, 38.9, 32.1, 23.9, 22.5, 21.3, 14.3, 14.1. HRMS (ESI,  $m/z$ ) calculated for  $\text{C}_{20}\text{H}_{28}\text{N}_3\text{O}_2$  ( $\text{M} + \text{H}$ ) $^+$ : 342.2176, Found: 342.2175.

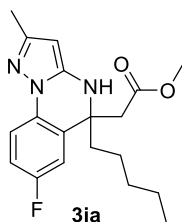

**methyl 2-(7-fluoro-2-methyl-5-pentyl-4,5-dihydropyrazolo-  
[1,5-a]quinazolin-5-yl)acetate (3ia)**

Flash chromatography for purification: hexane/ethyl acetate = 3:1. Rf = 0.25. Yellow liquid; Yield= 153.3 mg; (74%); <sup>1</sup>H NMR (400 MHz, CDCl<sub>3</sub>) δ 7.11 (dd, *J* = 11.3, 8.7 Hz, 1H), 7.04 (td, *J* = 8.0, 4.8 Hz, 1H), 6.89 (d, *J* = 7.7 Hz, 1H), 5.34 (s, 1H), 5.25 (s, 1H), 3.65 (s, 3H), 2.82 (d, *J* = 15.7 Hz, 1H), 2.65 (d, *J* = 15.7 Hz, 1H), 2.26 (s, 3H), 1.97-1.77 (m, 2H), 1.41-1.26 (m, 1H), 1.25-1.08 (m, 5H), 0.80 (t, *J* = 6.7 Hz, 3H). <sup>13</sup>C NMR (101 MHz, CDCl<sub>3</sub>) δ 171.5, 151.8 (d, *J* = 4.3 Hz), 151.4 (d, *J* = 254.8 Hz), 144.9, 129.3, 124.3 (d, *J* = 7.8 Hz), 123.1 (d, *J* = 8.4 Hz), 120.2 (d, *J* = 3.5 Hz), 117.1 (d, *J* = 20.8 Hz), 88.1, 58.1, 51.9, 43.9, 38.4, 32.0, 23.8, 22.5, 14.5, 14.0. <sup>19</sup>F{<sup>1</sup>H} NMR (376 MHz, CDCl<sub>3</sub>): δ 118.3. HRMS (ESI, *m/z*) calculated for C<sub>19</sub>H<sub>25</sub>FN<sub>3</sub>O<sub>2</sub> (M + H)<sup>+</sup>: 346.1925, Found: 346.1933.

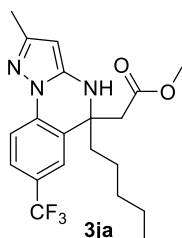

**methyl 2-(2-methyl-5-pentyl-7-(trifluoromethyl)-4,5-  
dihydropyrazolo[1,5-a]quinazolin-5-yl)acetate (3ja)**

Flash chromatography for purification: hexane/ethyl acetate = 3:1. Rf = 0.25. Yellow liquid; Yield= 170.7 mg; (72%); <sup>1</sup>H NMR (400 MHz, CDCl<sub>3</sub>) δ 7.81 (d, *J* = 8.5 Hz, 1H), 7.55 (d, *J* = 8.9 Hz, 1H), 7.29 (s, 1H), 5.34 (s, 1H), 5.28 (s, 1H), 3.65 (s, 3H), 2.87 (d, *J* = 15.6 Hz, 1H), 2.68 (d, *J* = 15.7 Hz, 1H), 2.22 (s, 3H), 1.93-1.88 (m, 2H), 1.33 (m, 1H), 1.21 (m, 5H), 0.79 (t, *J* = 6.8 Hz, 3H). <sup>13</sup>C NMR (101 MHz, CDCl<sub>3</sub>) δ 171.4, 152.7, 144.5, 136.7, 126.1, 126.0 (q, *J* = 3.4 Hz), 125.8, 125.6, 122.9, 122.0 (q, *J* = 3.6 Hz), 121.0 (q, *J* = 273.0 Hz), 114.7, 88.1, 57.8, 52.0, 44.6, 38.9, 31.9, 23.8, 22.4, 14.3, 14.0. <sup>19</sup>F{<sup>1</sup>H} NMR (376 MHz, CDCl<sub>3</sub>): δ 62.0. HRMS (ESI, *m/z*) calculated for C<sub>20</sub>H<sub>25</sub>F<sub>3</sub>N<sub>3</sub>O<sub>2</sub> (M + H)<sup>+</sup>: 396.1893, Found: 396.1899.

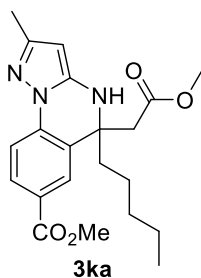

**methyl 5-(2-methoxy-2-oxoethyl)-2-methyl-5-pentyl-4,5-  
dihydropyrazolo[1,5-a]quinazolin-7-carboxylate (3ka)**

Flash chromatography for purification: hexane/ethyl acetate = 2:1. Rf = 0.3. Yellow solid; mp 170–172 °C; Yield= 183.4 mg; (78%); <sup>1</sup>H NMR (400 MHz, CDCl<sub>3</sub>) δ 8.01–7.97 (m, 1H), 7.81–7.74 (m, 2H), 5.40 (s, 1H), 5.28 (s, 1H), 3.89 (s, 3H), 3.66 (s, 3H), 2.88 (d, *J* = 15.8 Hz, 1H), 2.74 (d, *J* = 15.8 Hz, 1H), 2.24 (s, 3H), 2.00–1.86 (m, 2H), 1.34–1.13 (m, 6H), 0.81–0.73 (m, 3H). <sup>13</sup>C NMR (101 MHz, CDCl<sub>3</sub>) δ 171.5, 166.5, 152.7, 144.5, 137.3, 130.4, 126.5, 125.5, 124.9, 114.1, 87.8, 57.6, 52.1, 51.8, 44.7, 39.2, 31.8, 23.7, 22.4, 14.2, 13.9. HRMS (ESI, *m/z*) calculated for C<sub>21</sub>H<sub>28</sub>N<sub>3</sub>O<sub>4</sub> (M + H)<sup>+</sup>: 386.2074, Found: 386.2079.

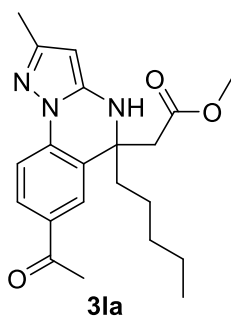

**methyl 2-(7-acetyl-2-methyl-5-pentyl-4,5-dihydropyrazolo[1,5-a]quinazolin-5-yl)acetate (31a)**

Flash chromatography for purification: hexane/ethyl acetate = 1:1. Rf = 0.3. Yellow solid; mp 184–188 °C; Yield= 184.1 mg; (81%); <sup>1</sup>H NMR (400 MHz, CDCl<sub>3</sub>) δ 7.92 – 7.86 (m, 1H), 7.78 (dd, *J* = 15.7, 5.8 Hz, 2H), 5.44 (s, 1H), 5.29 (s, 1H), 3.68 (s, 3H), 2.88 (d, *J* = 15.8 Hz, 1H), 2.75 (d, *J* = 15.9 Hz, 1H), 2.57 (s, 3H), 2.24 (s, 3H), 2.01 – 1.85 (m, 2H), 1.30 – 1.07 (m, 6H), 0.78 (d, *J* = 6.6 Hz, 3H). <sup>13</sup>C NMR (101 MHz, CDCl<sub>3</sub>) δ 196.8, 171.6, 153.0, 144.7, 137.6, 132.8, 130.9, 129.9, 125.4, 125.1, 114.1, 113.8, 87.9, 57.7, 52.0, 44.8, 39.4, 31.9, 26.5, 23.8, 22.5, 14.3, 14.0. HRMS (ESI, *m/z*) calculated for C<sub>21</sub>H<sub>28</sub>N<sub>3</sub>O<sub>3</sub> (*M* + *H*)<sup>+</sup>: 370.2125, Found: 370.2128.

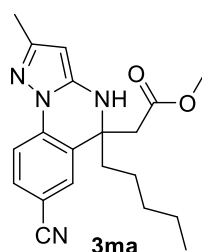

**methyl 2-(7-cyano-2-methyl-5-pentyl-4,5-dihydropyrazolo[1,5-a]quinazolin-5-yl)acetate (3ma)**

Flash chromatography for purification: hexane/ethyl acetate = 3:1. Rf = 0.22. Yellow solid; mp 172–174 °C; Yield= 147.9 mg; (70%); <sup>1</sup>H NMR (400 MHz, CDCl<sub>3</sub>) δ 7.87 (d, *J* = 8.4 Hz, 1H), 7.61 (dd, *J* = 8.4, 1.7 Hz, 1H), 7.36 (d, *J* = 1.7 Hz, 1H), 5.44 (s, 1H), 5.32 (s, 1H), 3.69 (s, 3H), 2.88 (d, *J* = 15.8 Hz, 1H), 2.68 (d, *J* = 15.8 Hz, 1H), 2.26 (s, 3H), 1.91 (m, 2H), 1.33-1.13 (m, 6H), 0.85 – 0.79 (t, *J* = 6.84 Hz 3H). <sup>13</sup>C NMR (101 MHz, CDCl<sub>3</sub>) δ 171.2, 153.5, 144.8, 137.1, 133.1, 129.1, 125.9, 118.9, 115.3, 107.4, 88.5, 57.7, 52.2, 44.6, 39.2, 31.9, 23.9, 22.5, 14.2, 14.1. HRMS (ESI, *m/z*) calculated for C<sub>20</sub>H<sub>25</sub>N<sub>4</sub>O<sub>2</sub> (*M* + *H*)<sup>+</sup>: 353.1972, Found: 353.1960.

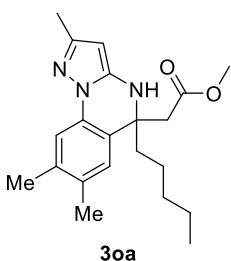

**methyl 2-(2,7,8-trimethyl-5-pentyl-4,5-dihydropyrazolo[1,5-a]quinazolin-5-yl)acetate (30a)**

Flash chromatography for purification: hexane/ethyl acetate = 3:1. Rf = 0.25. Yellow liquid; Yield= 179.0 mg; (84%); <sup>1</sup>H NMR (400 MHz, CDCl<sub>3</sub>) δ 7.52 (s, 1H), 6.80 (s, 1H), 5.26 (s, 1H), 5.18 (s, 1H), 3.67 (s, 3H), 2.83 (d, *J* = 15.6 Hz, 1H), 2.63 (d, *J* = 15.7 Hz, 1H), 2.25 (s, 3H), 2.24 (s, 3H), 2.23 (s, 3H), 1.98-1.76 (m, 2H), 1.36 (m, 1H), 1.20 (m, 5H), 0.81 (t, *J* = 6.2 Hz, 3H). <sup>13</sup>C NMR (101 MHz, CDCl<sub>3</sub>) δ 172.0, 150.8, 144.0, 137.3, 132.3, 132.1, 125.6, 122.6, 115.4, 87.5, 57.5, 51.9, 45.1, 38.9, 32.1, 23.9, 22.6, 19.7, 19.6, 14.3, 14.1. HRMS (ESI, *m/z*) calculated for C<sub>21</sub>H<sub>30</sub>N<sub>3</sub>O<sub>2</sub> (*M* + *H*)<sup>+</sup>: 356.2333, Found: 356.2347.

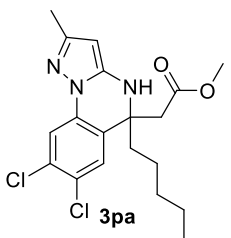

**methyl 2-(7,8-dichloro-2-methyl-5-pentyl-4,5-dihydro-pyrazolo[1,5-a]quinazolin-5-yl)acetate (3pa)**

Flash chromatography for purification: hexane/ethyl acetate = 3:1. Rf = 0.25. Yellow liquid; Yield= 154.1 mg; (65%); <sup>1</sup>H NMR (400 MHz, CDCl<sub>3</sub>) δ 7.84 (s, 1H), 7.13 (s, 1H), 5.28 (s, 2H), 3.67 (s, 3H), 2.84 (d, *J* = 15.8 Hz,

1H), 2.64 (d,  $J = 15.8$  Hz, 1H), 2.22 (s, 3H), 1.87 (m, 2H), 1.39 – 1.30 (m, 1H), 1.22 (m, 5H), 0.86 – 0.77 (t,  $J = 6.6$  Hz, 3H).  $^{13}\text{C}$  NMR (101 MHz,  $\text{CDCl}_3$ )  $\delta$  171.3, 152.3, 144.1, 133.6, 132.9, 127.3, 126.6, 125.2, 116.3, 88.1, 57.6, 52.0, 44.6, 39.1, 31.9, 23.8, 22.5, 14.3, 14.1. HRMS (ESI,  $m/z$ ) calculated for  $\text{C}_{19}\text{H}_{24}\text{Cl}_2\text{N}_3\text{O}_2$  ( $\text{M} + \text{H}$ ) $^+$ : 396.1240, Found: 396.1239.

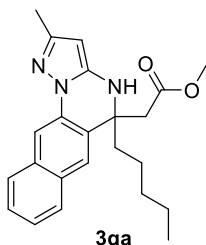

**methyl 2-(2-methyl-5-pentyl-4,5-dihydrobenzo[g]pyrazolo-[1,5-a]quinazolin-5-yl)acetate (3qa)**

Flash chromatography for purification: hexane/ethyl acetate = 3:1.  $R_f = 0.28$ . Yellow solid; mp 188–190 °C. Yield= 183.3 mg; (81%);  $^1\text{H}$  NMR (400 MHz,  $\text{CDCl}_3$ )  $\delta$  8.14 (s, 1H), 7.82 (d,  $J = 8.0$  Hz, 1H), 7.75 (d,  $J = 8.1$  Hz, 1H), 7.54 (s, 1H), 7.43 (m, 1H), 7.40 – 7.35 (m, 1H), 5.39 (s, 1H), 5.35 (s, 1H), 3.67 (s, 3H), 2.96 (d,  $J = 15.7$  Hz, 1H), 2.81 (d,  $J = 15.9$  Hz, 1H), 2.30 (s, 3H), 2.22 – 1.87 (m, 2H), 1.36 (m, 1H), 1.23 (m, 5H), 0.79 (m, 3H).  $^{13}\text{C}$  NMR (101 MHz,  $\text{CDCl}_3$ )  $\delta$  171.8, 151.9, 144.5, 133.5, 131.9, 130.5, 127.9, 127.5, 127.0, 126.6, 125.1, 124.3, 110.7, 88.0, 57.9, 51.9, 44.8, 39.1, 32.1, 23.9, 22.5, 14.4, 14.1. HRMS (ESI,  $m/z$ ) calculated for  $\text{C}_{23}\text{H}_{28}\text{N}_3\text{O}_2$  ( $\text{M} + \text{H}$ ) $^+$ : 378.2176, Found: 378.2179.

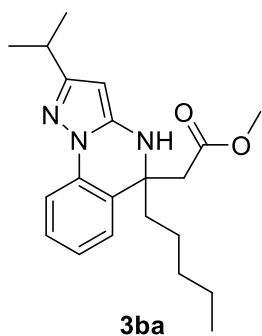

**methyl 2-(2-isopropyl-5-pentyl-4,5-dihydropyrazolo[1,5-a]quinazolin-5-yl)acetate (3ba)**

Flash chromatography for purification: hexane/ethyl acetate = 3:1.  $R_f = 0.25$ . Yellow liquid; Yield= 181.2 mg; (85%);  $^1\text{H}$  NMR (400 MHz,  $\text{CDCl}_3$ )  $\delta$  7.76 (dt,  $J = 7.9, 0.9$  Hz, 1H), 7.31 – 7.23 (m, 1H), 7.07 (d,  $J = 0.9$  Hz, 1H), 7.06 (dd,  $J = 1.9, 0.9$  Hz, 1H), 5.31 (s, 1H), 5.25 (s, 1H), 3.64 (s, 3H), 2.97 – 2.89 (m, 1H), 2.86 (d,  $J = 15.6$  Hz, 1H), 2.64 (d,  $J = 15.6$  Hz, 1H), 2.02 – 1.77 (m, 2H), 1.43 – 1.31 (m, 1H), 1.26 (s, 3H), 1.25 (s, 3H), 1.23 – 1.14 (m, 5H), 0.84 – 0.73 (m, 3H).  $^{13}\text{C}$  NMR (101 MHz,  $\text{CDCl}_3$ )  $\delta$  171.7, 161.5, 143.7, 134.3, 128.4, 125.0, 124.5, 124.4, 123.9, 114.5, 84.4, 57.5, 51.7, 44.7, 38.6, 31.9, 28.4, 23.8, 22.7, 22.4, 13.9. HRMS (ESI,  $m/z$ ) calculated for  $\text{C}_{21}\text{H}_{30}\text{N}_3\text{O}_2$  ( $\text{M} + \text{H}$ ) $^+$ : 356.2333, Found: 356.2333.

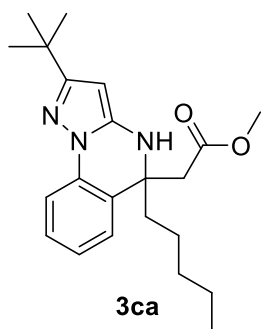

**methyl 2-(2-(tert-butyl)-5-pentyl-4,5-dihydropyrazolo[1,5-a]quinazolin-5-yl)acetate (3ca)**

Flash chromatography for purification: hexane/ethyl acetate = 3:1.  $R_f = 0.25$ . Yellow liquid; Yield= 186.1 mg; (84%);  $^1\text{H}$  NMR (400 MHz,  $\text{CDCl}_3$ )  $\delta$  7.81 (d,  $J = 8.1$  Hz, 1H), 7.35 – 7.27 (m, 1H), 7.08 (d,  $J = 4.3$  Hz, 2H), 5.36 (s, 1H), 5.21 (s, 1H), 3.67 (s, 3H), 2.89 (d,  $J = 15.6$  Hz, 1H), 2.65 (d,  $J = 15.6$  Hz, 1H), 2.02 – 1.82 (m, 2H), 1.32 (s, 9H), 1.25 – 1.16 (m, 6H), 0.86 – 0.76 (m, 3H).  $^{13}\text{C}$  NMR (101 MHz,  $\text{CDCl}_3$ )  $\delta$  171.7, 164.1, 143.5, 134.4, 128.4, 125.0, 124.4, 124.4, 123.8, 114.7, 84.4, 57.5, 51.7, 44.6, 38.5, 32.5, 31.9, 30.2, 23.9, 22.5, 14.0. HRMS (ESI,  $m/z$ ) calculated for  $\text{C}_{22}\text{H}_{32}\text{N}_3\text{O}_2$  ( $\text{M} + \text{H}$ ) $^+$ : 370.2489, Found: 370.2491.

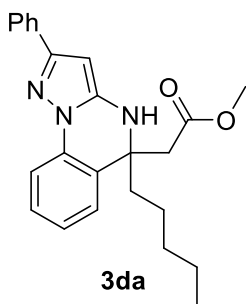

**methyl 2-(5-pentyl-2-phenyl-4,5-dihydropyrazolo[1,5-a]quinazolin-5-yl)acetate (3da)**

Flash chromatography for purification: hexane/ethyl acetate = 3:1.  $R_f$  = 0.3. Yellow solid; mp 184–188 °C; Yield= 189.1 mg; (81%);  $^1\text{H}$  NMR (400 MHz,  $\text{CDCl}_3$ )  $\delta$  8.03 – 7.96 (m, 1H), 7.93 – 7.82 (m, 2H), 7.44 – 7.37 (m, 3H), 7.37 – 7.30 (m, 1H), 7.21 – 7.09 (m, 2H), 5.84 (s, 1H), 5.49 (s, 1H), 3.69 (s, 3H), 2.94 (d,  $J$  = 15.8 Hz, 1H), 2.74 (d,  $J$  = 15.8 Hz, 1H), 2.02 – 1.87 (m, 2H), 1.46 – 1.30 (m, 1H), 1.28 – 1.13 (m, 5H), 0.86 – 0.75 (m, 3H).  $^{13}\text{C}$  NMR (101 MHz,  $\text{CDCl}_3$ )  $\delta$  171.7, 152.7, 144.4, 134.0, 133.1, 128.7, 128.5, 128.1, 125.8, 125.5, 124.6, 124.5, 114.9, 110.5, 85.0, 57.7, 51.8, 44.7, 38.9, 31.9, 23.8, 22.4, 14.0. HRMS (ESI,  $m/z$ ) calculated for  $\text{C}_{24}\text{H}_{28}\text{N}_3\text{O}_2$  ( $\text{M} + \text{H}$ ) $^+$ : 390.2176, Found: 390.2176.

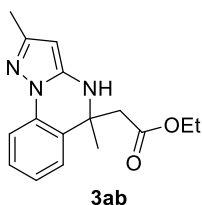

**ethyl 2-(2,5-dimethyl-4,5-dihydropyrazolo[1,5-a]quinazolin-5-yl)acetate (3ab)**

Flash chromatography for purification: hexane/ethyl acetate = 3:1.  $R_f$  = 0.25. Yellow liquid; Yield= 135.2 mg; (79%);  $^1\text{H}$  NMR (400 MHz, acetone- $d_6$ )  $\delta$  7.68 (d,  $J$  = 8.4 Hz, 1H), 7.33 (t,  $J$  = 7.1 Hz, 2H), 7.12 (t,  $J$  = 7.6 Hz, 1H), 5.96 (s, 1H), 5.29 (s, 1H), 3.99 (q,  $J$  = 7.1 Hz, 2H), 2.78 – 2.66 (m, 2H), 2.14 (s, 3H), 1.74 (s, 3H), 1.11 (t,  $J$  = 7.1 Hz, 3H).  $^{13}\text{C}$  NMR (101 MHz, acetone- $d_6$ )  $\delta$  169.8, 150.1, 144.3, 133.8, 128.2, 127.6, 124.5, 123.8, 113.8, 87.0, 60.0, 54.4, 45.4, 26.0, 13.4. HRMS (ESI,  $m/z$ ) calculated for  $\text{C}_{16}\text{H}_{20}\text{N}_3\text{O}_2$  ( $\text{M} + \text{H}$ ) $^+$ : 386.1550, Found: 386.1546.

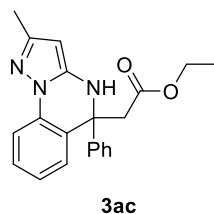

**ethyl 2-(2-methyl-5-phenyl-4,5-dihydropyrazolo[1,5-a]quinazolin-5-yl)acetate (3ac)**

Flash chromatography for purification: hexane/ethyl acetate = 3:1.  $R_f$  = 0.28. Yellow liquid; Yield= 160.4 mg; (77%);  $^1\text{H}$  NMR (400 MHz,  $\text{CDCl}_3$ )  $\delta$  7.72 (dd,  $J$  = 1.3, 0.4 Hz, 1H), 7.56 – 7.52 (m, 2H), 7.37 – 7.31 (m, 2H), 7.31 – 7.26 (m, 2H), 6.99 (td,  $J$  = 7.6, 1.3 Hz, 1H), 6.80 (m, 1H), 6.08 (s, 1H), 5.43 (s, 1H), 4.12 – 4.00 (m, 2H), 3.21 (d,  $J$  = 2.7 Hz, 2H), 2.29 (s, 3H), 1.15 (t,  $J$  = 7.1 Hz, 3H).  $^{13}\text{C}$  NMR (101 MHz,  $\text{CDCl}_3$ )  $\delta$  171.3, 151.6, 144.3, 143.1, 133.5, 128.9, 128.6, 127.9, 127.3, 127.1, 126.0, 124.2, 114.5, 88.5, 60.9, 60.7, 42.6, 14.4, 14.1. HRMS (ESI,  $m/z$ ) calculated for  $\text{C}_{21}\text{H}_{22}\text{N}_3\text{O}_2$  ( $\text{M} + \text{H}$ ) $^+$ : 348.1707, Found: 348.1706.

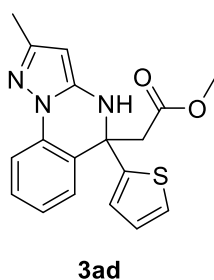

**methyl 2-(2-methyl-5-(thiophen-2-yl)-4,5-dihydropyrazolo[1,5-a]quinazolin-5-yl)acetate (3ad)**

Flash chromatography for purification: hexane/ethyl acetate = 3:1.  $R_f$  = 0.3. Yellow solid; mp 184–188 °C; Yield= 159.4 mg; (79%);  $^1\text{H}$  NMR (400 MHz,  $\text{CDCl}_3$ )  $\delta$  7.79 (d,  $J$  = 8.0 Hz, 1H), 7.35 – 7.30 (m, 2H), 7.07 (d,  $J$  = 3.6 Hz, 1H), 7.04 (t,  $J$  = 7.6 Hz, 1H), 6.98 (t,  $J$  = 4.3 Hz, 1H), 6.89 (d,  $J$  =



7.8 Hz, 1H), 6.29 (s, 1H), 5.48 (s, 1H), 3.65 (s, 3H), 3.22 – 3.11 (m, 2H), 2.31 (s, 3H). <sup>13</sup>C NMR (101 MHz, CDCl<sub>3</sub>) δ 171.4, 151.5, 148.0, 143.6, 132.7, 129.5, 126.8, 126.8, 126.7, 125.5, 125.2, 124.9, 114.8, 89.3, 59.4, 52.2, 43.1, 14.2. HRMS (ESI, m/z) calculated for C<sub>18</sub>H<sub>18</sub>N<sub>3</sub>O<sub>2</sub>S (M + H)<sup>+</sup>: 340.1114, Found: 340.1114.

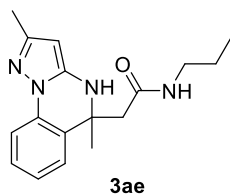

3ae

**2-(2,5-dimethyl-4,5-dihydropyrazolo[1,5-a]quinazolin-5-yl)-N-propylacetamide (3ae)**

Flash chromatography for purification: hexane/ethyl acetate = 3:1. R<sub>f</sub> = 0.2. Yellow liquid; Yield = 143.1 mg; (80%); <sup>1</sup>H NMR (400 MHz, CDCl<sub>3</sub>) δ 7.72 (dd, *J* = 8.1, 1.2 Hz, 1H), 7.31 (ddd, *J* = 8.1, 7.3, 1.5 Hz, 1H), 7.16 (dd, *J* = 7.8, 1.5 Hz, 1H), 7.09 (td, *J* = 7.5, 1.3 Hz, 1H), 5.70 (s, 1H), 5.53 (s, 1H), 5.35 (s, 1H), 3.26 – 3.06 (m, 2H), 2.77 (d, *J* = 14.7 Hz, 1H), 2.33 (d, *J* = 14.7 Hz, 1H), 2.26 (s, 3H), 1.68 (d, *J* = 0.6 Hz, 3H), 1.42 (p, *J* = 7.3 Hz, 2H), 0.84 (t, *J* = 7.4 Hz, 3H). <sup>13</sup>C NMR (101 MHz, CDCl<sub>3</sub>) δ 170.3, 151.4, 144.3, 133.6, 128.8, 127.9, 124.5, 123.8, 114.5, 88.7, 55.0, 46.1, 41.23, 26.5, 22.8, 14.4, 11.4. HRMS (ESI, m/z) calculated for C<sub>17</sub>H<sub>23</sub>N<sub>4</sub>O (M + H)<sup>+</sup>: 299.1866, Found: 299.1866.

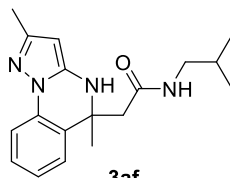

3af

**2-(2,5-dimethyl-4,5-dihydropyrazolo[1,5-a]quinazolin-5-yl)-N-isobutylacetamide (3af)**

Flash chromatography for purification: hexane/ethyl acetate = 3:1. R<sub>f</sub> = 0.2. Yellow liquid; Yield = 163.0 mg; (87%); <sup>1</sup>H NMR (400 MHz, CDCl<sub>3</sub>) δ 7.72 (dd, *J* = 8.0, 1.2 Hz, 1H), 7.31 (m, 1H), 7.16 (dd, *J* = 7.8, 1.4 Hz, 1H), 7.09 (td, *J* = 7.5, 1.3 Hz, 1H), 5.78 (m, 1H), 5.52 (s, 1H), 5.35 (s, 1H), 3.11 – 3.04 (m, 1H), 2.95 (m, 1H), 2.80 (d, *J* = 14.8 Hz, 1H), 2.35 (d, *J* = 14.8 Hz, 1H), 2.26 (s, 3H), 1.70 – 1.64 (m, 4H), 0.84 – 0.76 (t, 6.8 Hz, 3H). <sup>13</sup>C NMR (101 MHz, CDCl<sub>3</sub>) δ 170.3, 151.4, 144.3, 133.6, 128.8, 127.9, 124.5, 123.8, 114.6, 88.8, 55.0, 46.9, 46.1, 28.5, 26.7, 20.1, 14.4. HRMS (ESI, m/z) calculated for C<sub>18</sub>H<sub>25</sub>N<sub>4</sub>O (M + H)<sup>+</sup>: 313.2023, Found: 313.2026.

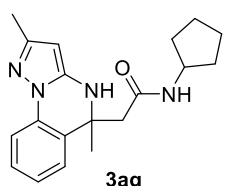

3ag

**N-cyclopentyl-2-(2,5-dimethyl-4,5-dihydropyrazolo[1,5-a]quinazolin-5-yl)acetamide (3ag)**

Flash chromatography for purification: hexane/ethyl acetate = 3:1. R<sub>f</sub> = 0.2. Yellow liquid; Yield = 157.6 mg; (81%); <sup>1</sup>H NMR (400 MHz, CDCl<sub>3</sub>) δ 7.73 (dd, *J* = 8.0, 1.2 Hz, 1H), 7.32 (m, 1H), 7.16 (dd, *J* = 7.8, 1.4 Hz, 1H), 7.09 (m, 1H), 5.54 (d, *J* = 7.5 Hz, 1H), 5.47 (s, 1H), 5.35 (s, 1H), 4.14 (m, 1H), 2.74 (d, *J* = 14.6 Hz, 1H), 2.32 (d, *J* = 14.6 Hz, 1H), 2.26 (s, 3H), 1.96 – 1.84 (m, 2H), 1.71 – 1.64 (m, 4H), 1.60 – 1.52 (m, 4H). <sup>13</sup>C NMR (101 MHz, CDCl<sub>3</sub>) δ 169.8, 151.4, 144.3, 133.6, 128.8, 127.8, 124.5, 123.9, 114.6, 88.7, 55.1, 51.3, 46.4, 33.2, 26.5, 23.7, 14.4. HRMS (ESI, m/z) calculated for C<sub>19</sub>H<sub>25</sub>N<sub>4</sub>O (M + H)<sup>+</sup>: 325.2023, Found: 325.2017.

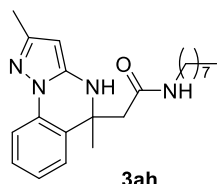

**2-(2,5-dimethyl-4,5-dihydropyrazolo[1,5-a]quinazolin-5-yl)-N-octylacetamide (3ah)**

Flash chromatography for purification: hexane/ethyl acetate = 3:1. Rf = 0.2. Yellow liquid; Yield = 156.9 mg; (71%);  $^1\text{H NMR}$  (400 MHz,  $\text{CDCl}_3$ )  $\delta$  7.71 (d,  $J = 8.4$  Hz, 1H), 7.28 (d,  $J = 7.4$  Hz, 1H), 7.13 (m, 1H), 7.07 (m, 1H), 5.79 (s, 1H), 5.61 (s, 1H), 5.34 (s, 1H), 3.25 – 3.06 (m, 2H), 2.74 (d,  $J = 14.8$  Hz, 1H), 2.32 (d,  $J = 14.7$  Hz, 1H), 2.25 (s, 3H), 1.64 (s, 3H), 1.43 – 1.13 (m, 12H), 0.90 – 0.81 (t,  $J = 6.8$  Hz, 3H).  $^{13}\text{C NMR}$  (101 MHz,  $\text{CDCl}_3$ )  $\delta$  170.3, 151.4, 144.4, 133.4, 128.7, 127.8, 124.5, 123.9, 114.5, 88.7, 55.0, 46.0, 39.6, 31.9, 29.6, 29.3, 29.3, 27.0, 26.6, 22.7, 14.3, 14.2. HRMS (ESI,  $m/z$ ) calculated for  $\text{C}_{22}\text{H}_{33}\text{N}_4\text{O}$  ( $\text{M} + \text{H}$ ) $^+$ : 369.2649, Found: 369.2646.

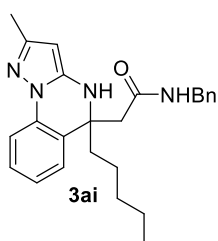

**N-benzyl-2-(2-methyl-5-pentyl-4,5-dihydropyrazolo[1,5-a]quinazolin-5-yl)acetamide (3ai)**

Flash chromatography for purification: hexane/ethyl acetate = 3:1. Rf = 0.2. Yellow liquid; Yield = 222 mg; (92%);  $^1\text{H NMR}$  (400 MHz,  $\text{CDCl}_3$ )  $\delta$  7.74 – 7.69 (m, 1H), 7.33 – 7.22 (m, 4H), 7.12 – 7.04 (m, 4H), 6.23 (t,  $J = 5.8$  Hz, 1H), 5.31 (s, 1H), 5.29 (s, 1H), 4.41 (dd,  $J = 14.8, 6.0$  Hz, 1H), 4.28 (dd,  $J = 14.8, 5.5$  Hz, 1H), 2.85 (d,  $J = 14.9$  Hz, 1H), 2.46 (d,  $J = 14.9$  Hz, 1H), 2.24 (s, 3H), 1.91 (td,  $J = 6.9, 5.8, 3.5$  Hz, 2H), 1.19 (tt,  $J = 6.7, 4.2$  Hz, 6H), 0.85 – 0.76 (t, 6.8 Hz, 3H).  $^{13}\text{C NMR}$  (101 MHz,  $\text{CDCl}_3$ )  $\delta$  170.2, 151.3, 144.1, 137.9, 134.2, 128.8, 128.7, 127.6, 125.5, 124.7, 124.3, 114.5, 88.2, 58.4, 46.3, 43.5, 39.8, 32.0, 23.8, 22.6, 14.3, 14.1. HRMS (ESI,  $m/z$ ) calculated for  $\text{C}_{25}\text{H}_{31}\text{N}_4\text{O}$  ( $\text{M} + \text{H}$ ) $^+$ : 403.2429, Found: 403.2494.

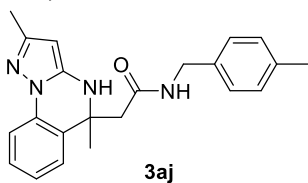

**2-(2,5-dimethyl-4,5-dihydropyrazolo[1,5-a]quinazolin-5-yl)-N-(4-methylbenzyl)acetamide (3aj)**

Flash chromatography for purification: hexane/ethyl acetate = 3:1. Rf = 0.2. Yellow liquid; Yield = 181.5 mg; (84%);  $^1\text{H NMR}$  (400 MHz,  $\text{CDCl}_3$ )  $\delta$  7.70 (dd,  $J = 8.1, 1.2$  Hz, 1H), 7.30 (m, 1H), 7.15 – 7.08 (m, 2H), 7.08 – 7.01 (m, 4H), 6.10 (t,  $J = 5.7$  Hz, 1H), 5.51 (s, 1H), 5.31 (s, 1H), 4.32 (m, 2H), 2.78 (d,  $J = 14.8$  Hz, 1H), 2.35 (d,  $J = 14.9$  Hz, 1H), 2.31 (s, 3H), 2.24 (s, 3H), 1.67 (s, 3H).  $^{13}\text{C NMR}$  (101 MHz,  $\text{CDCl}_3$ )  $\delta$  170.1, 151.4, 144.2, 137.4, 134.9, 133.6, 129.5, 128.7, 127.8, 127.7, 124.5, 123.8, 114.6, 88.7, 55.1, 46.1, 43.3, 26.6, 21.2, 14.3. HRMS (ESI,  $m/z$ ) calculated for  $\text{C}_{22}\text{H}_{25}\text{N}_4\text{O}$  ( $\text{M} + \text{H}$ ) $^+$ : 361.2023, Found: 361.2027.

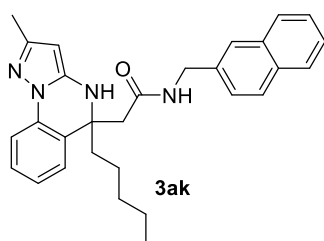

**2-(2-methyl-5-pentyl-4,5-dihydropyrazolo[1,5-a]quinazolin-5-yl)-N-(naphthalen-2-ylmethyl)acetamide (3ak)**

Flash chromatography for purification: hexane/ethyl acetate = 3:1. Rf = 0.2. Yellow liquid; Yield = 252.3 mg; (93%);  $^1\text{H NMR}$  (400 MHz,  $\text{CDCl}_3$ )  $\delta$  7.93 – 7.84 (m, 2H), 7.78 (dt,  $J = 8.3, 1.0$  Hz, 1H), 7.69 – 7.63 (m, 1H), 7.55 – 7.44 (m, 2H), 7.36 (dd,  $J = 8.3,$

7.0 Hz, 1H), 7.29 – 7.18 (m, 2H), 7.04 – 6.93 (m, 2H), 6.16 (t,  $J = 5.5$  Hz, 1H), 5.23 (s, 1H), 5.12 (s, 1H), 4.80 (qd,  $J = 14.5, 5.4$  Hz, 2H), 2.79 (d,  $J = 14.8$  Hz, 1H), 2.40 (d,  $J = 14.8$  Hz, 1H), 1.94 – 1.87 (m, 2H), 1.17 (m, 6H), 0.84 – 0.76 (t, 6.8 Hz, 3H).  $^{13}\text{C}$  NMR (101 MHz,  $\text{CDCl}_3$ )  $\delta$  169.9, 151.3, 144.0, 134.1, 133.9, 133.3, 131.3, 129.0, 128.8, 128.6, 126.8, 126.7, 126.1, 125.5, 125.4, 124.6, 124.2, 123.3, 114.4, 88.1, 58.4, 46.5, 41.6, 39.5, 32.0, 23.8, 22.6, 14.3, 14.1. HRMS (ESI,  $m/z$ ) calculated for  $\text{C}_{29}\text{H}_{33}\text{N}_4\text{O}$  ( $\text{M} + \text{H}$ ) $^+$ : 453.2649, Found: 453.2651.

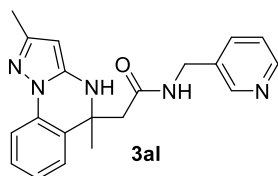

**2-(2,5-dimethyl-4,5-dihydropyrazolo[1,5-a]quinoxalin-5-yl)-N-(pyridin-3-ylmeth-yl)acetamide (3al)**

Flash chromatography for purification: hexane/ethyl acetate = 3:1.  $R_f = 0.2$ . Yellow liquid; Yield= 193.7 mg; (93%);  $^1\text{H}$  NMR (400 MHz,  $\text{CDCl}_3$ )  $\delta$  8.45 (s, 1H), 8.40 (s, 1H), 7.68 (s, 1H), 7.43 (d,  $J = 9.1$  Hz, 1H), 7.33 – 7.26 (m, 1H), 7.20 (s, 1H), 7.13 (s, 1H), 7.06 (s, 1H), 6.57 (m, 1H), 5.35 (s, 1H), 5.33 (s, 1H), 4.40 (m, 1H), 4.29 (m, 1H), 2.82 (d,  $J = 15.0$  Hz, 1H), 2.45 (d,  $J = 15.0$  Hz, 1H), 2.23 (s, 3H), 1.66 (s, 3H).  $^{13}\text{C}$  NMR (101 MHz,  $\text{CDCl}_3$ )  $\delta$  170.4, 151.4, 148.7, 148.5, 144.1, 136.0, 133.5, 128.9, 127.5, 124.7, 124.0, 123.9, 114.6, 88.9, 55.2, 46.2, 40.9, 29.4, 27.1, 14.3. HRMS (ESI,  $m/z$ ) calculated for  $\text{C}_{20}\text{H}_{22}\text{N}_5\text{O}$  ( $\text{M} + \text{H}$ ) $^+$ : 348.1819, Found: 348.1815.

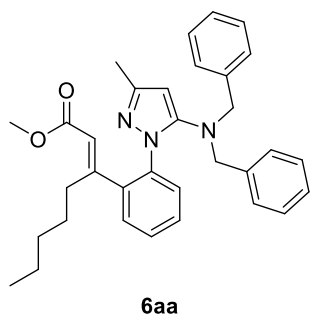

**methyl (E)-3-(2-(5-(dibenzylamino)-3-methyl-1H-pyrazol-1-yl)phenyl)oct-2-enoate (6aa)**

Flash chromatography for purification: hexane/ethyl acetate = 20:1.  $R_f = 0.45$ . Yellow liquid; Yield= 95.0 mg; (66%);  $^1\text{H}$  NMR (400 MHz,  $\text{CDCl}_3$ )  $\delta$  7.37 (dt,  $J = 5.1, 2.4$  Hz, 3H), 7.33 – 7.28 (m, 1H), 7.26 – 7.19 (m, 6H), 7.01 (dd,  $J = 7.3, 2.0$  Hz, 4H), 5.92 (s, 1H), 5.58 (s, 1H), 3.85 (s, 4H), 3.68 (s, 3H), 2.52 – 2.40 (m, 2H), 2.21 (s, 3H), 1.28 – 1.04 (m, 6H), 0.78 – 0.73 (m, 3H).  $^{13}\text{C}$  NMR (101 MHz,  $\text{CDCl}_3$ )  $\delta$  166.7, 162.3, 152.5, 148.6, 139.6, 137.7, 137.0, 130.5, 129.3, 128.6, 128.5, 128.3, 128.3, 127.3, 119.4, 96.0, 55.6, 51.1, 31.9, 30.6, 28.8, 22.5, 14.2, 14.1. HRMS (ESI,  $m/z$ ) calculated for  $\text{C}_{33}\text{H}_{38}\text{N}_3\text{O}_2$  ( $\text{M} + \text{H}$ ) $^+$ : 508.2959, Found: 508.2956.

## 8. Spectral Data of 3aa-3al

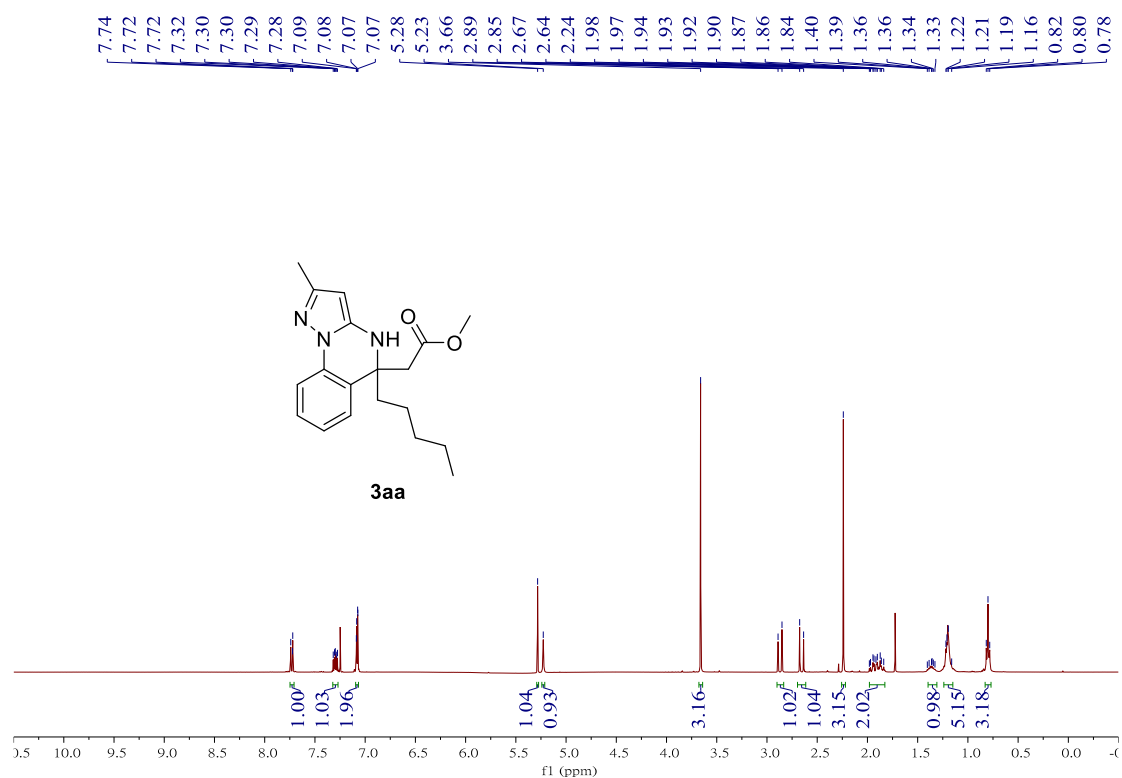

<sup>1</sup>H spectrum (400 MHz) of compound **3aa** in CDCl<sub>3</sub>

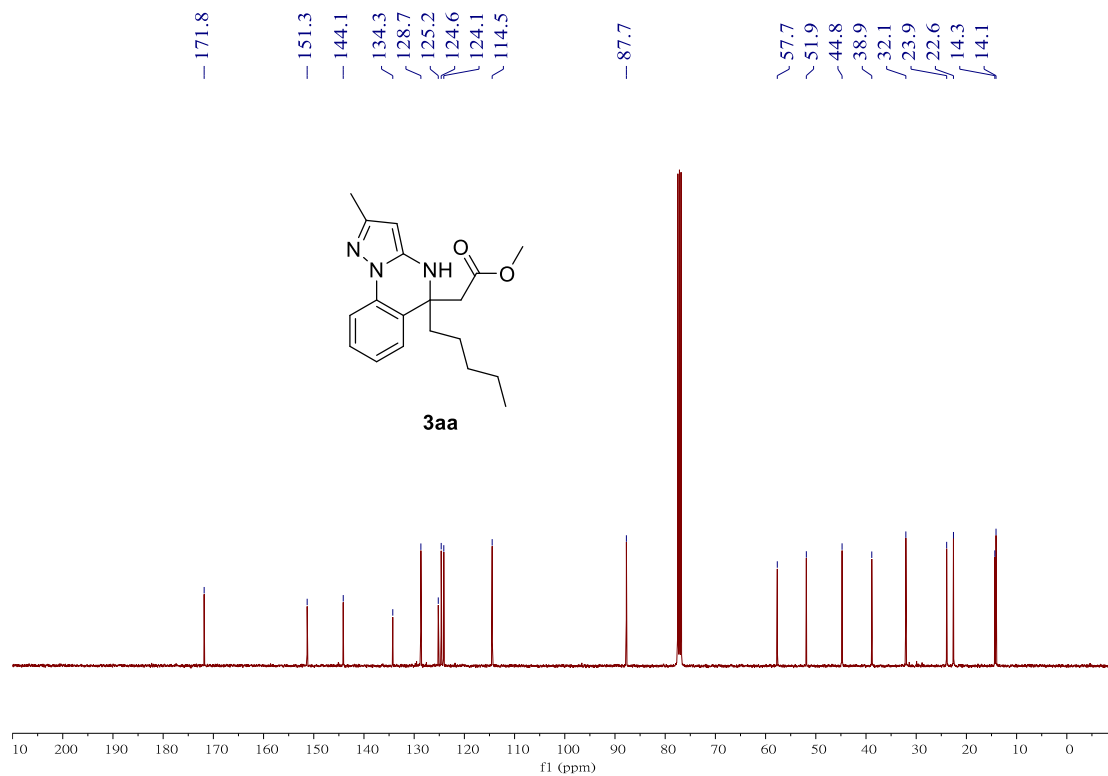

<sup>13</sup>C{<sup>1</sup>H} spectrum (101 MHz) of compound **3aa** in CDCl<sub>3</sub>

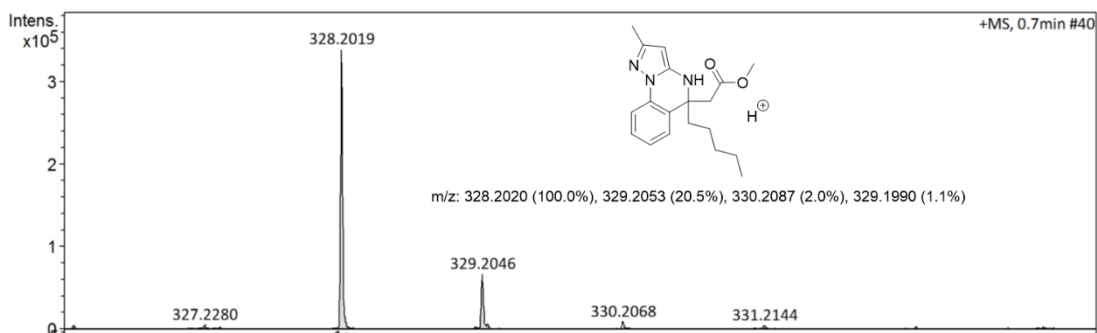

### Display Report

| Meas. m/z | # | Ion Formula                                                   | m/z      | err [ppm] | mSigma | # Sigma | Score  | rdb | e <sup>-</sup> Conf | N-Rule | Adduct |
|-----------|---|---------------------------------------------------------------|----------|-----------|--------|---------|--------|-----|---------------------|--------|--------|
| 328.2019  | 1 | C <sub>19</sub> H <sub>26</sub> N <sub>3</sub> O <sub>2</sub> | 328.2020 | 0.2       | 13.1   | 1       | 100.00 | 8.5 | even                | ok     | M+H    |

### HRMS Mass (ESI) spectrum of compound 3aa

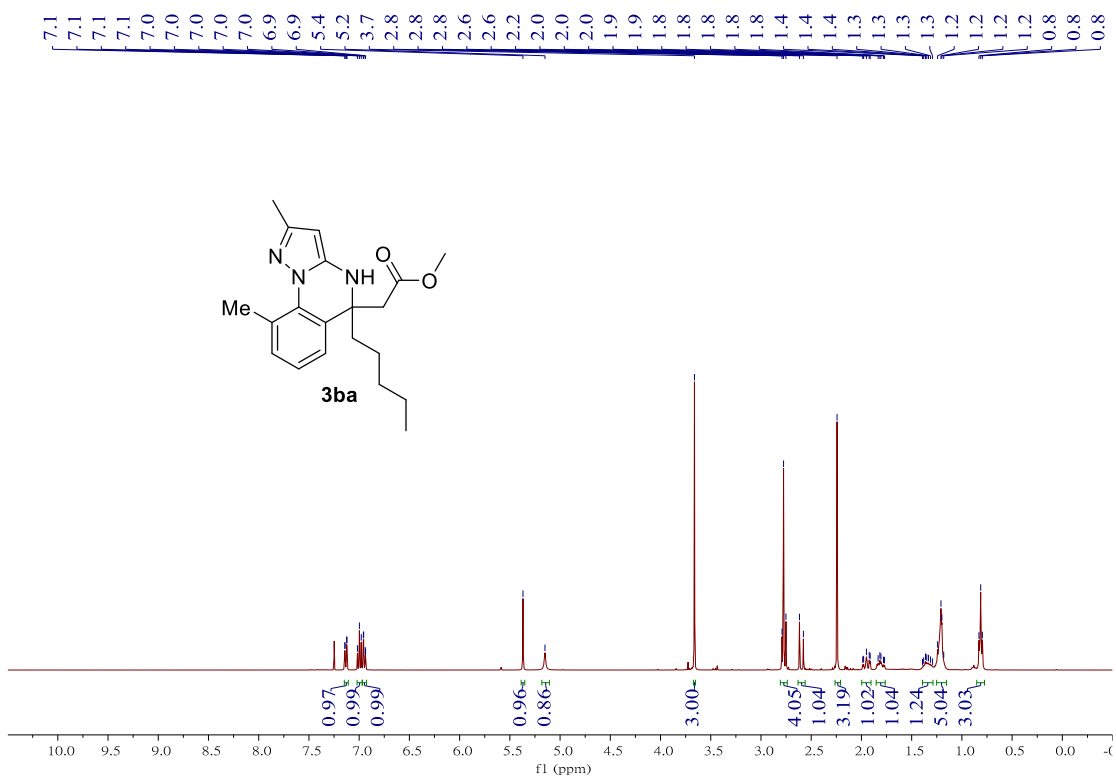

### <sup>1</sup>H spectrum (400 MHz) of compound 3ba in CDCl<sub>3</sub>

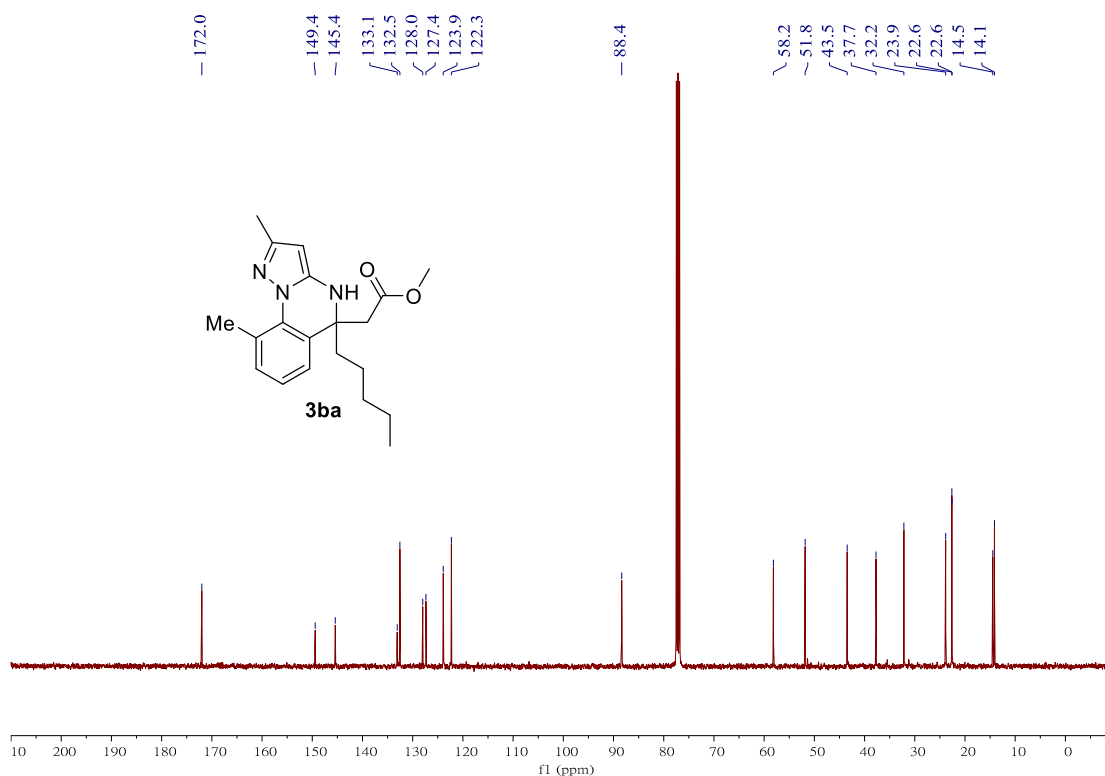

$^{13}\text{C}\{^1\text{H}\}$  spectrum (101 MHz) of compound **3ba** in  $\text{CDCl}_3$

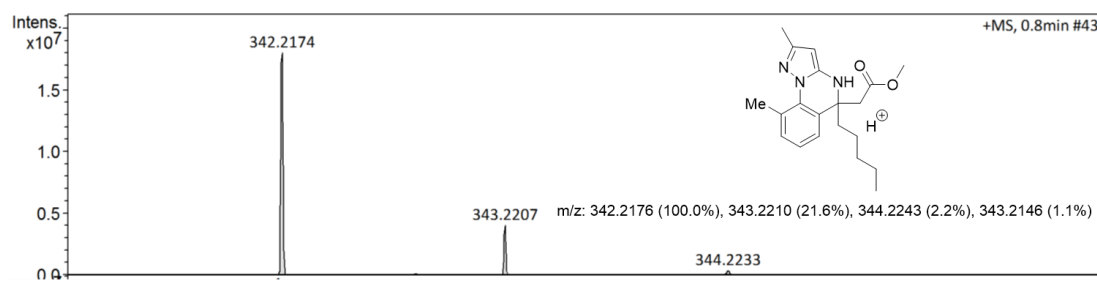

Display Report

| Meas. m/z | # | Ion Formula                                                   | m/z      | err [ppm] | mSigma | # Sigma | Score  | rdB | e <sup>-</sup> Conf | N-Rule | Adduct |
|-----------|---|---------------------------------------------------------------|----------|-----------|--------|---------|--------|-----|---------------------|--------|--------|
| 342.2174  | 1 | C <sub>20</sub> H <sub>28</sub> N <sub>3</sub> O <sub>2</sub> | 342.2176 | -0.6      | 6.3    | 1       | 100.00 | 8.5 | even                | ok     | M+H    |

HRMS Mass (ESI) spectrum of compound **3ba**

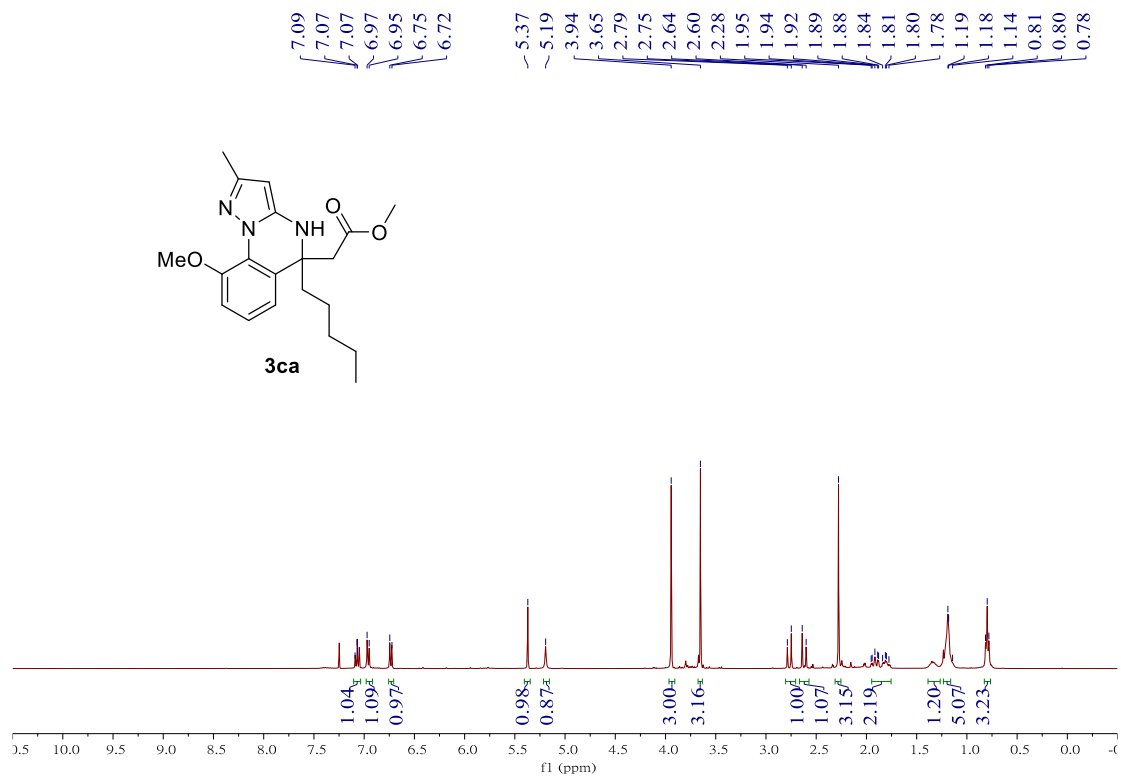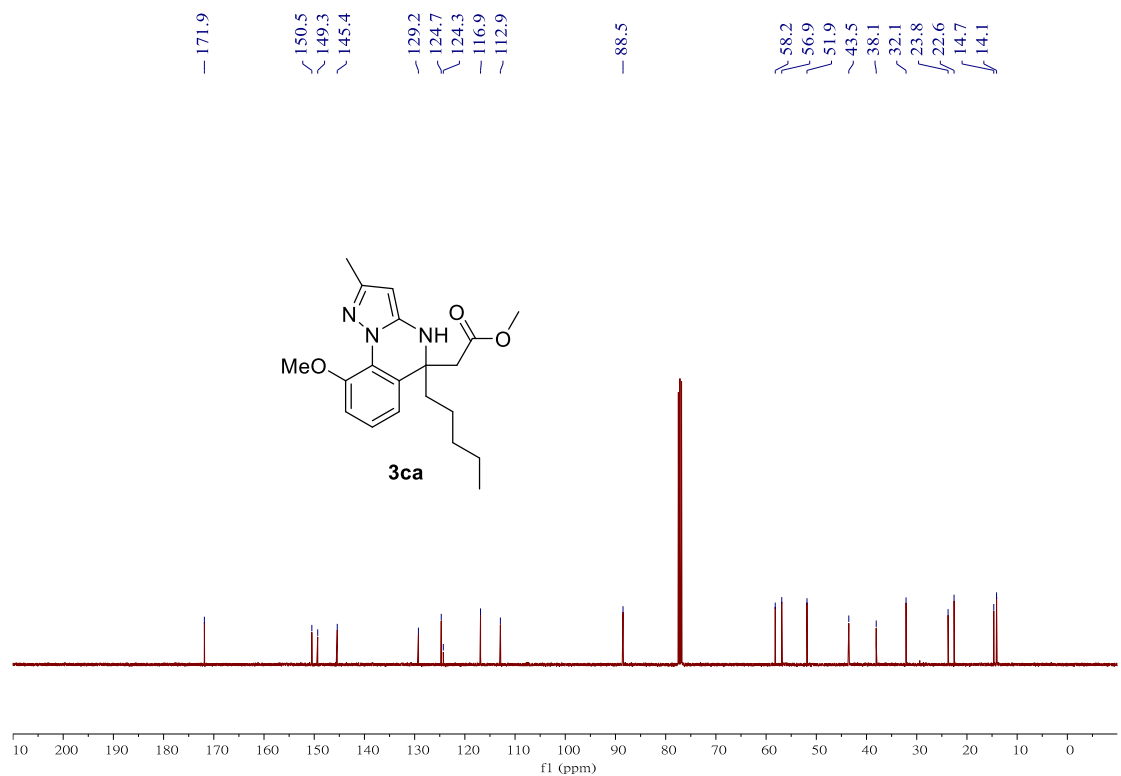

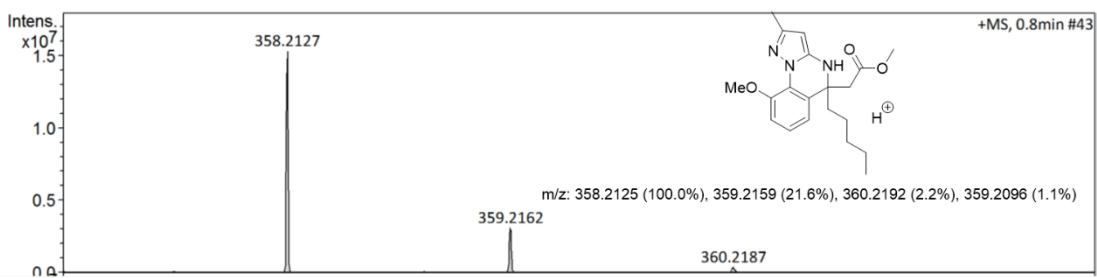

### Display Report

| Meas. m/z | # | Ion Formula                                                   | m/z      | err [ppm] | mSigma | # Sigma | Score  | rdb | e <sup>-</sup> Conf | N-Rule | Adduct |
|-----------|---|---------------------------------------------------------------|----------|-----------|--------|---------|--------|-----|---------------------|--------|--------|
| 358.2127  | 1 | C <sub>20</sub> H <sub>28</sub> N <sub>3</sub> O <sub>3</sub> | 358.2125 | -0.5      | 19.2   | 1       | 100.00 | 8.5 | even                | ok     | M+H    |

### HRMS Mass (ESI) spectrum of compound **3ca**

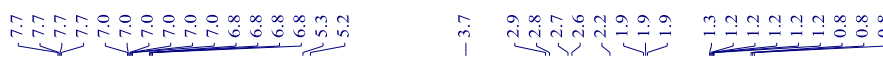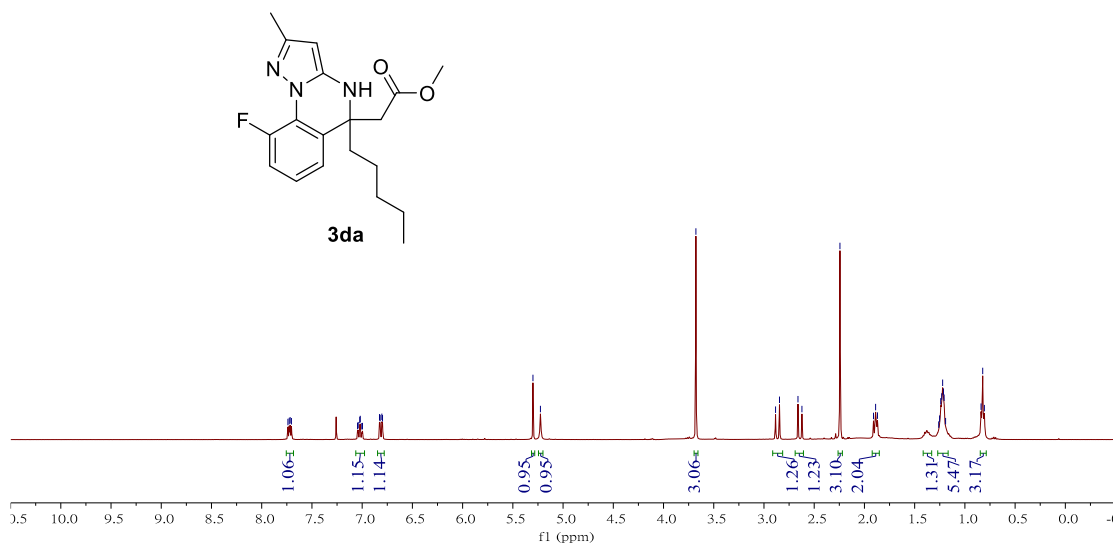

<sup>1</sup>H spectrum (400 MHz) of compound **3da** in CDCl<sub>3</sub>



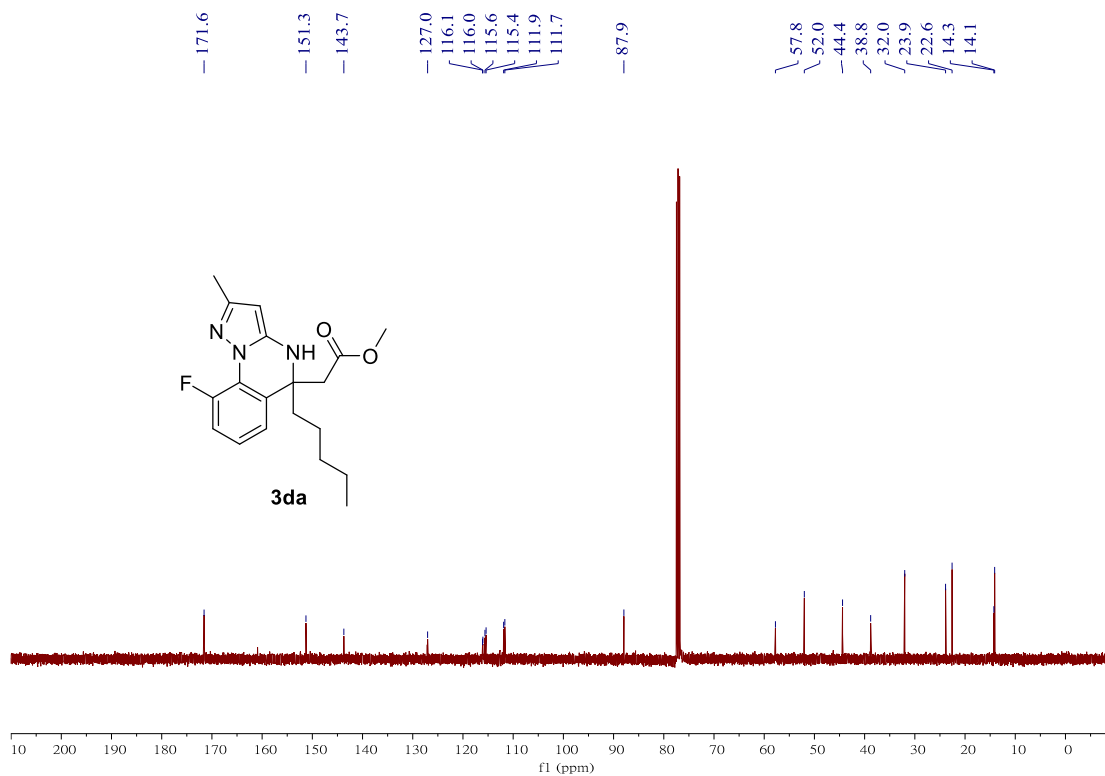

$^{13}\text{C}\{^1\text{H}\}$  spectrum (101 MHz) of compound **3da** in  $\text{CDCl}_3$

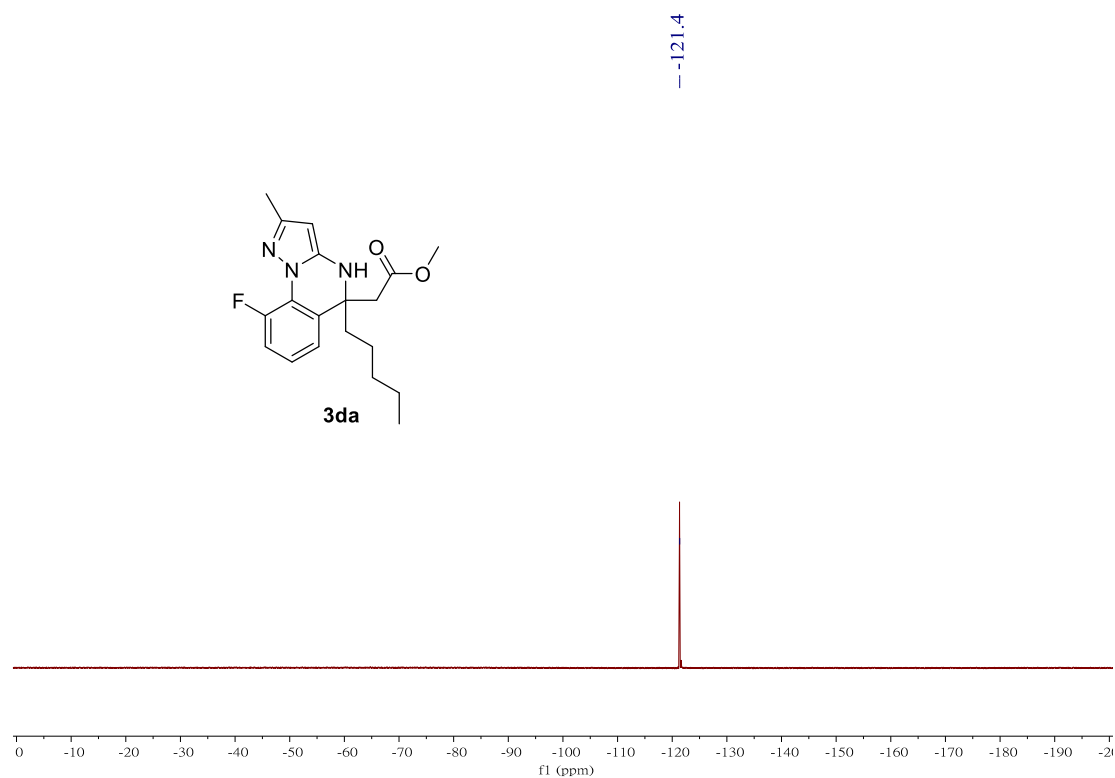

$^{19}\text{F}\{^1\text{H}\}$  spectrum (376 MHz) of compound **3da** in  $\text{CDCl}_3$

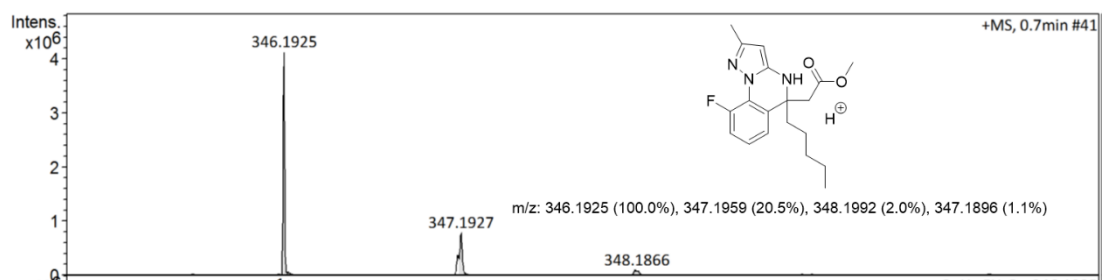

### Display Report

| Meas. m/z | # | Ion Formula                                                    | m/z      | err [ppm] | mSigma | # Sigma | Score  | rdb | e <sup>-</sup> Conf | N-Rule | Adduct |
|-----------|---|----------------------------------------------------------------|----------|-----------|--------|---------|--------|-----|---------------------|--------|--------|
| 346.1925  | 1 | C <sub>19</sub> H <sub>25</sub> FN <sub>3</sub> O <sub>2</sub> | 346.1925 | -0.0      | 18.1   | 1       | 100.00 | 8.5 | even                | ok     | M+H    |

### HRMS Mass (ESI) spectrum of compound 3da

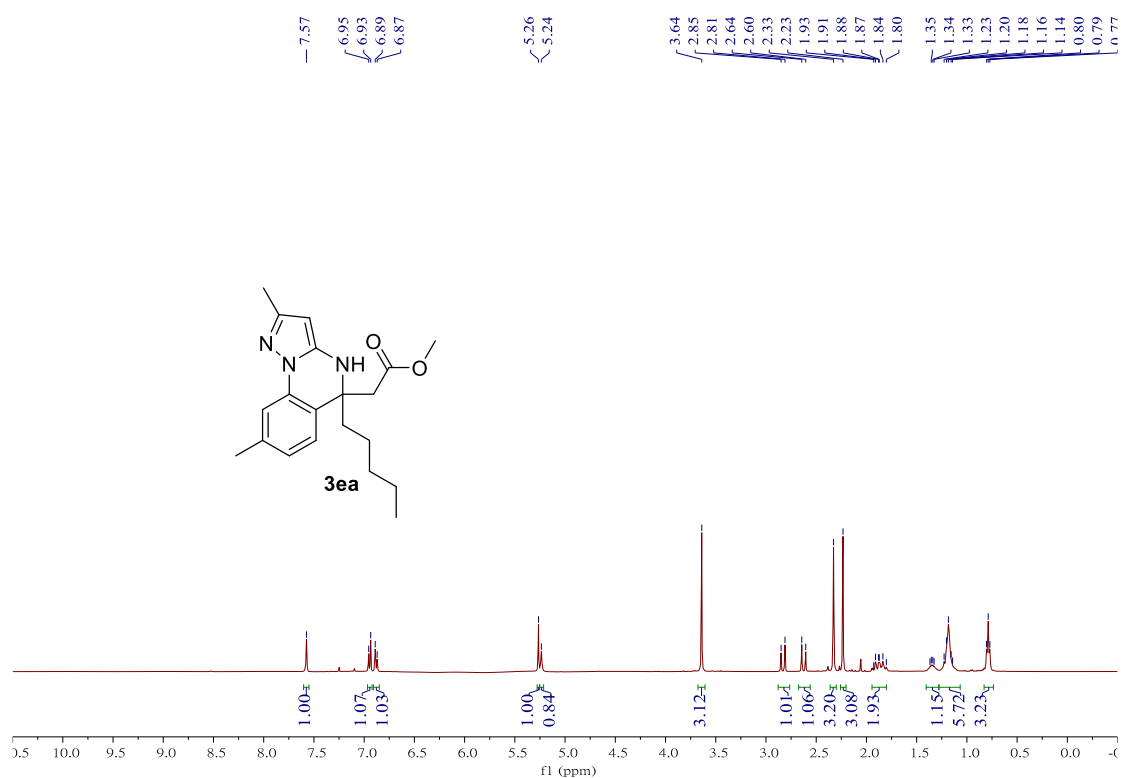

<sup>1</sup>H spectrum (400 MHz) of compound 3ea in CDCl<sub>3</sub>

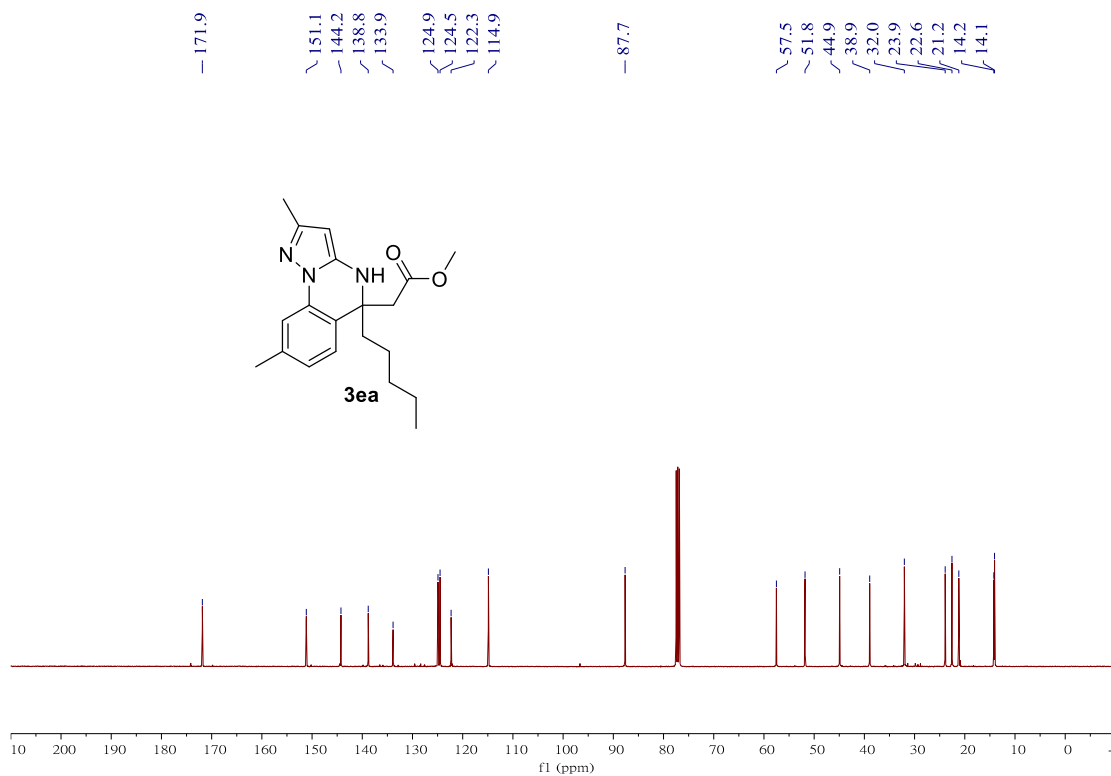

$^{13}\text{C}\{^1\text{H}\}$  spectrum (101 MHz) of compound **3ea** in  $\text{CDCl}_3$

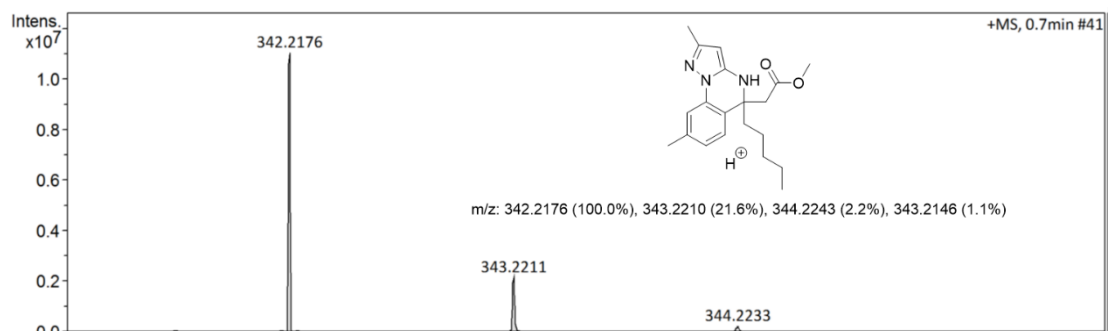

### Display Report

| Meas. $m/z$ | # | Ion Formula                                      | $m/z$    | err [ppm] | mSigma | # Sigma | Score  | rdb | $e^-$ Conf | N-Rule | Adduct |
|-------------|---|--------------------------------------------------|----------|-----------|--------|---------|--------|-----|------------|--------|--------|
| 342.2176    | 1 | $\text{C}_{20}\text{H}_{28}\text{N}_3\text{O}_2$ | 342.2176 | 0.0       | 21.9   | 1       | 100.00 | 8.5 | even       | ok     | M+H    |

HRMS Mass (ESI) spectrum of compound **3ea**

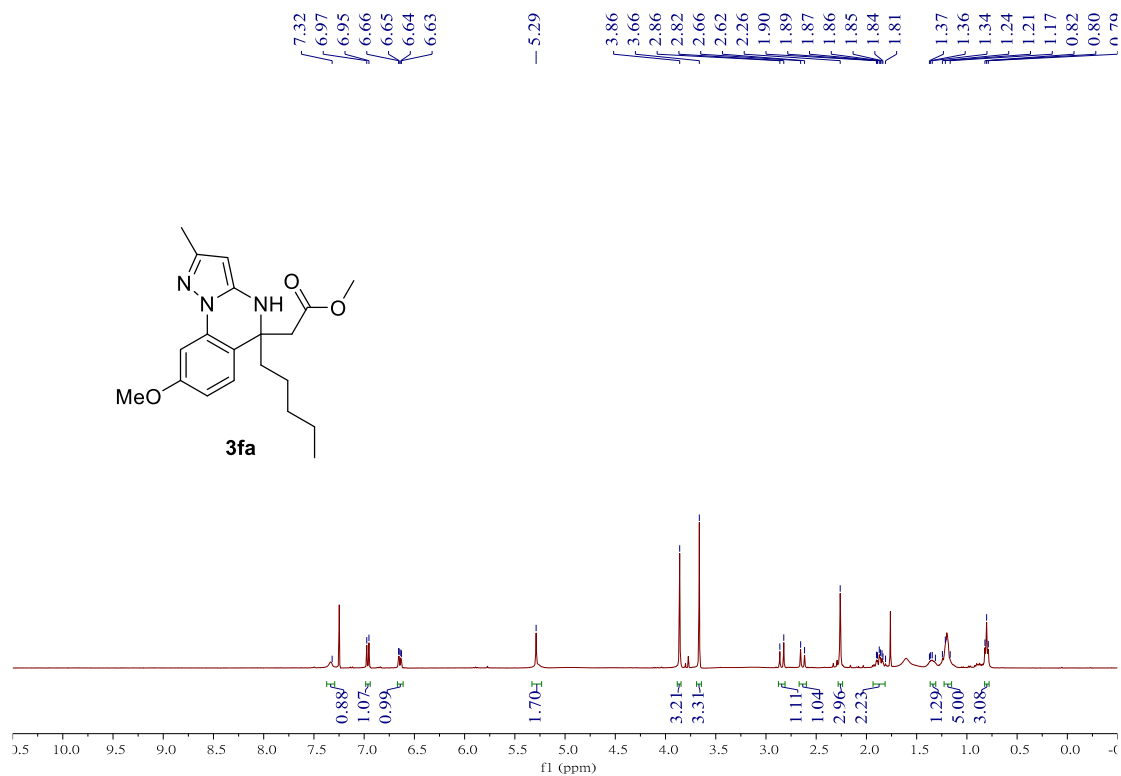

<sup>1</sup>H spectrum (400 MHz) of compound **3fa** in CDCl<sub>3</sub>

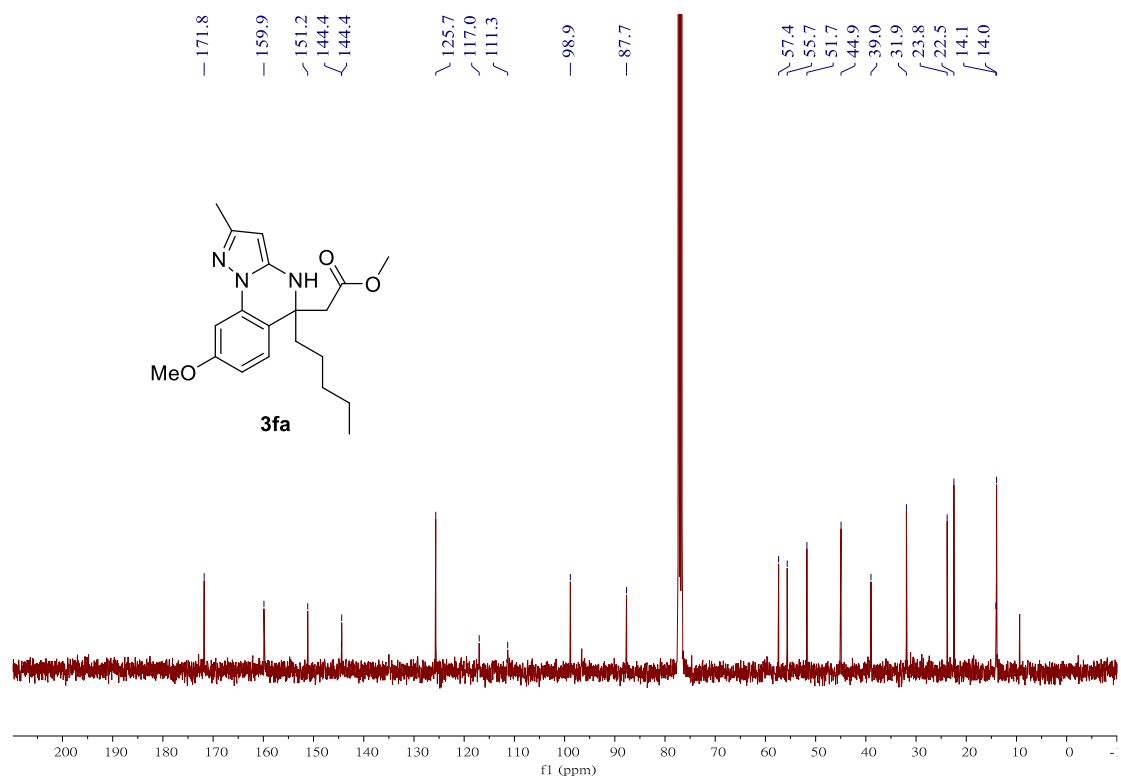

<sup>13</sup>C {<sup>1</sup>H} spectrum (101 MHz) of compound **3fa** in CDCl<sub>3</sub>

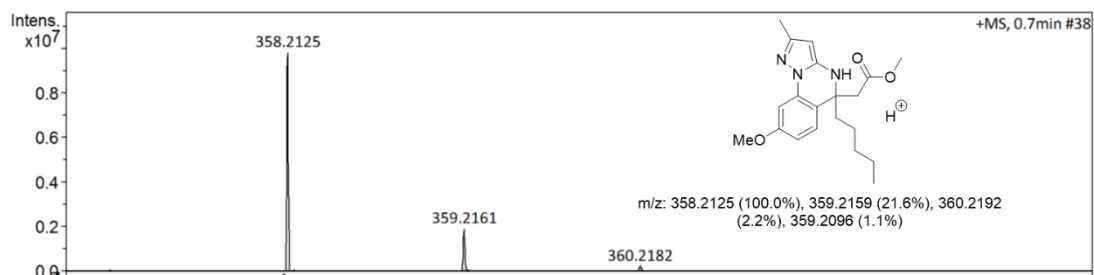

### Display Report

| Meas. m/z | # | Ion Formula                                                   | m/z      | err [ppm] | mSigma | # Sigma | Score  | rdb | e <sup>-</sup> Conf | N-Rule | Adduct |
|-----------|---|---------------------------------------------------------------|----------|-----------|--------|---------|--------|-----|---------------------|--------|--------|
| 358.2125  | 1 | C <sub>20</sub> H <sub>28</sub> N <sub>3</sub> O <sub>3</sub> | 358.2125 | -0.1      | 22.2   | 1       | 100.00 | 8.5 | even                | ok     | M+H    |

### HRMS Mass (ESI) spectrum of compound **3fa**

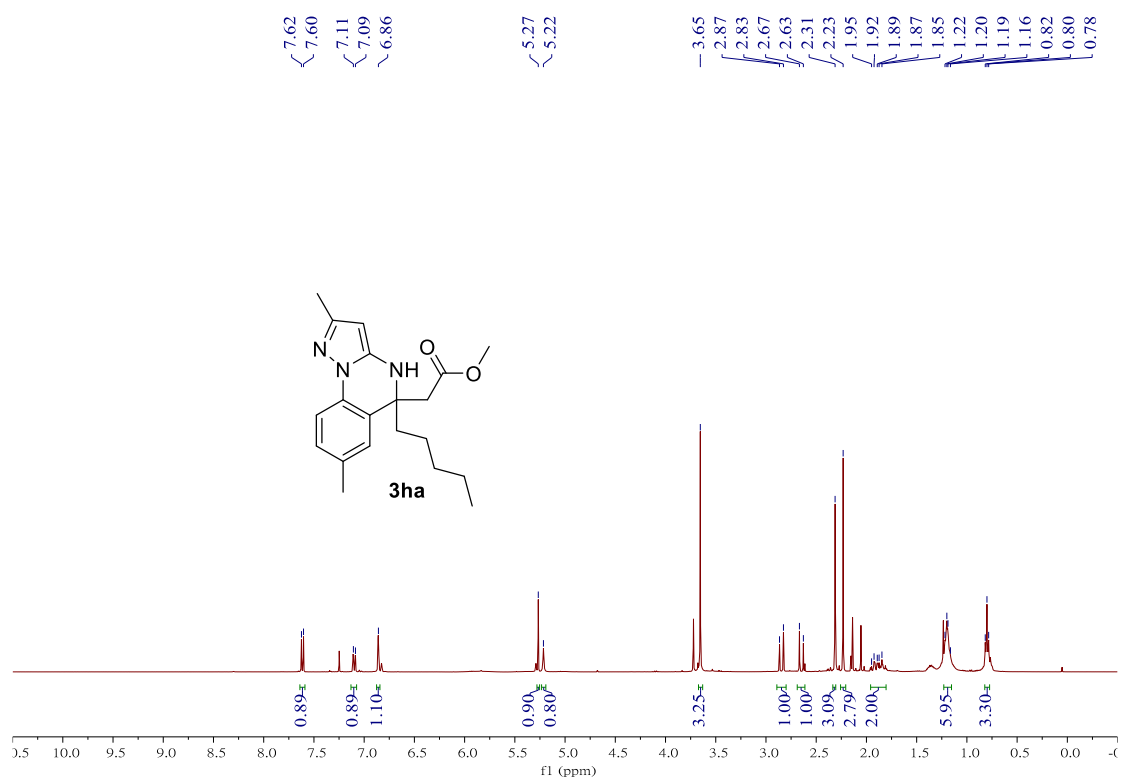

### <sup>1</sup>H spectrum (400 MHz) of compound **3ha** in CDCl<sub>3</sub>

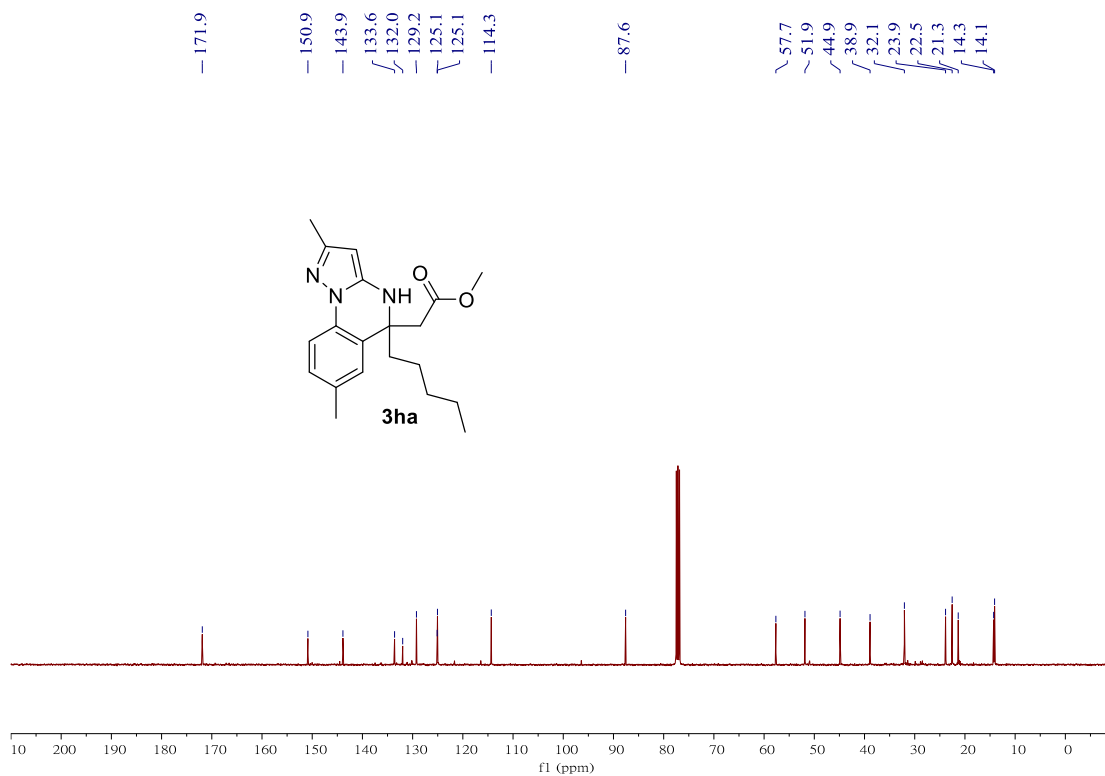

$^{13}\text{C}\{^1\text{H}\}$  spectrum (101 MHz) of compound **3ha** in  $\text{CDCl}_3$

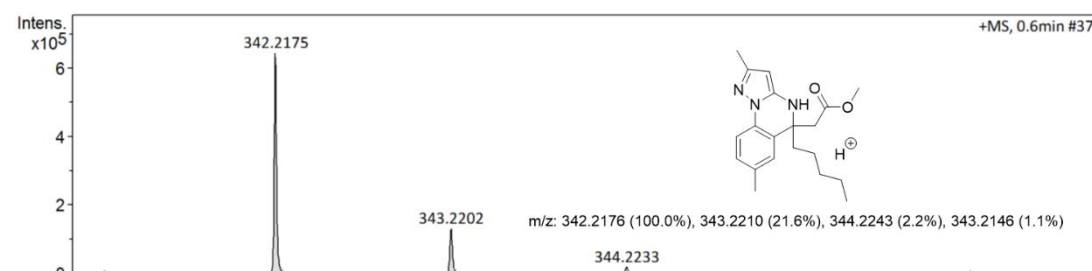

### Display Report

| Meas. $m/z$ | # | Ion Formula                                      | $m/z$    | err [ppm] | mSigma | # Sigma | Score  | rdb | $e^-$ Conf | N-Rule | Adduct |
|-------------|---|--------------------------------------------------|----------|-----------|--------|---------|--------|-----|------------|--------|--------|
| 342.2175    | 1 | $\text{C}_{20}\text{H}_{28}\text{N}_3\text{O}_2$ | 342.2176 | 0.4       | 16.5   | 1       | 100.00 | 8.5 | even       | ok     | M+H    |

HRMS Mass (ESI) spectrum of compound **3ha**

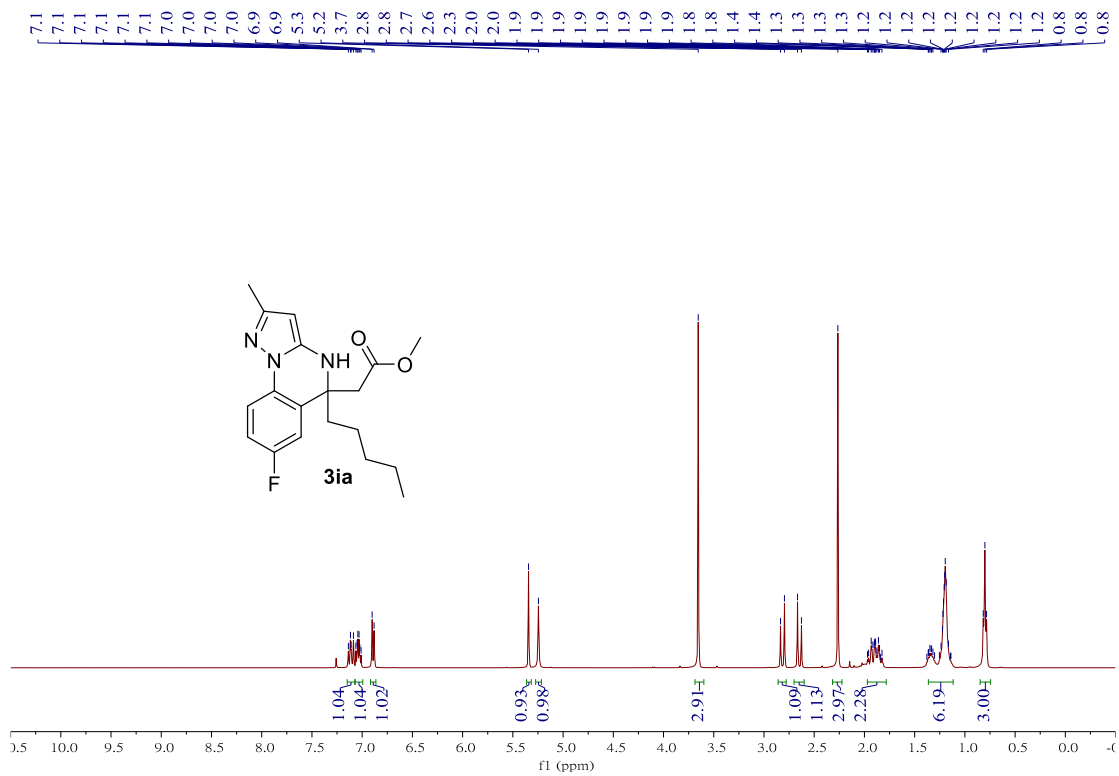

<sup>1</sup>H spectrum (400 MHz) of compound **3ia** in CDCl<sub>3</sub>

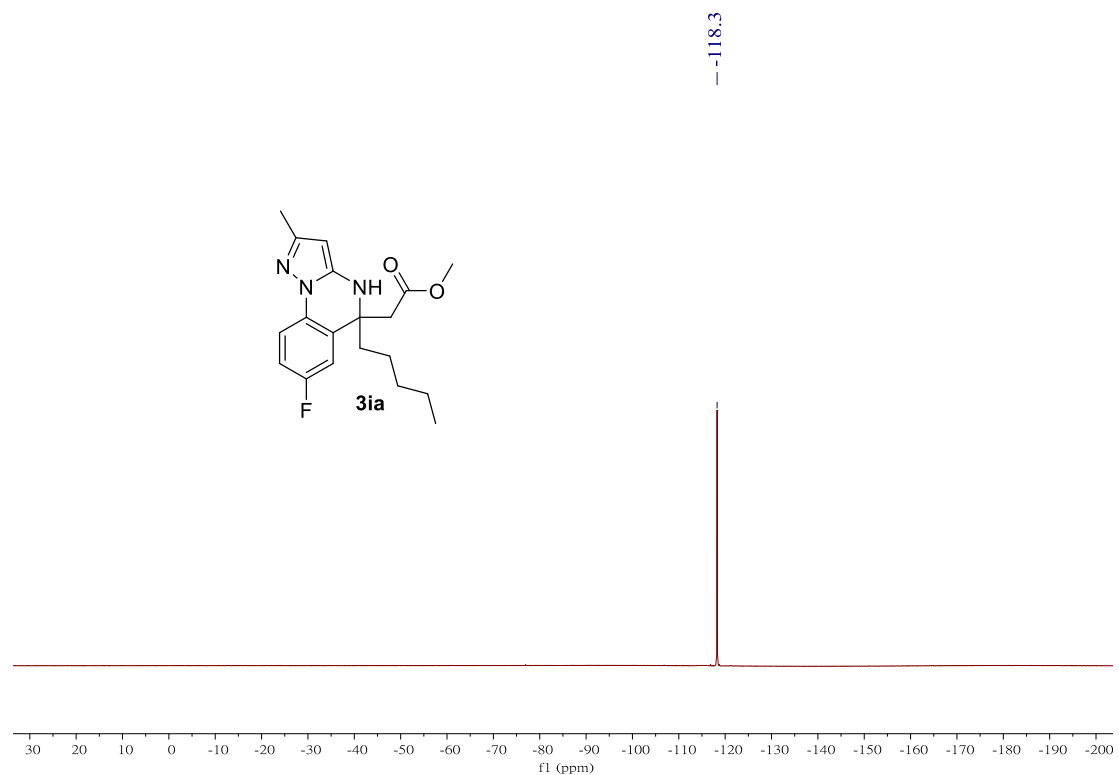

<sup>19</sup>F {<sup>1</sup>H} spectrum (376 MHz) of compound **3ia** in CDCl<sub>3</sub>

171.5  
 152.7  
 151.8  
 151.8  
 150.2  
 144.9  
 129.2  
 124.4  
 124.3  
 123.2  
 123.1  
 120.2  
 120.1  
 117.2  
 117.0  
 88.1  
 58.1  
 51.9  
 43.9  
 38.4  
 32.0  
 23.8  
 22.5  
 14.5  
 14.0

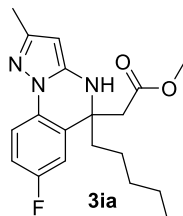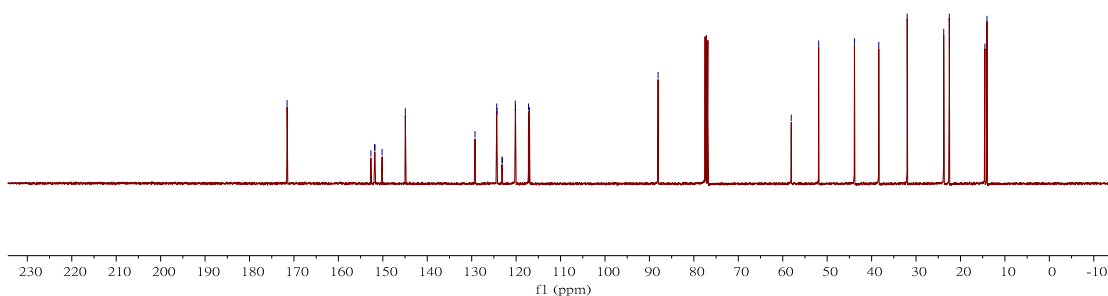

$^{13}\text{C}\{1\text{H}\}$  spectrum (101 MHz) of compound **3ia** in  $\text{CDCl}_3$

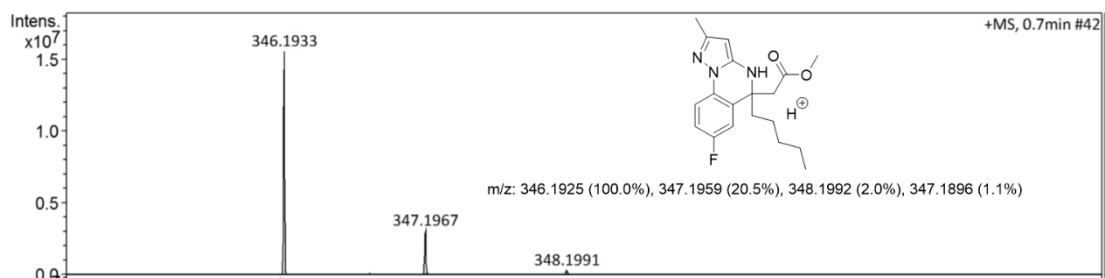

### Display Report

| Meas. m/z | # | Ion Formula                                                    | m/z      | err [ppm] | mSigma | # Sigma | Score  | rdb | e <sup>-</sup> Conf | N-Rule | Adduct |
|-----------|---|----------------------------------------------------------------|----------|-----------|--------|---------|--------|-----|---------------------|--------|--------|
| 346.1933  | 1 | C <sub>19</sub> H <sub>25</sub> FN <sub>3</sub> O <sub>2</sub> | 346.1925 | -2.3      | 14.3   | 1       | 100.00 | 8.5 | even                | ok     | M+H    |

HRMS Mass (ESI) spectrum of compound **3ia**



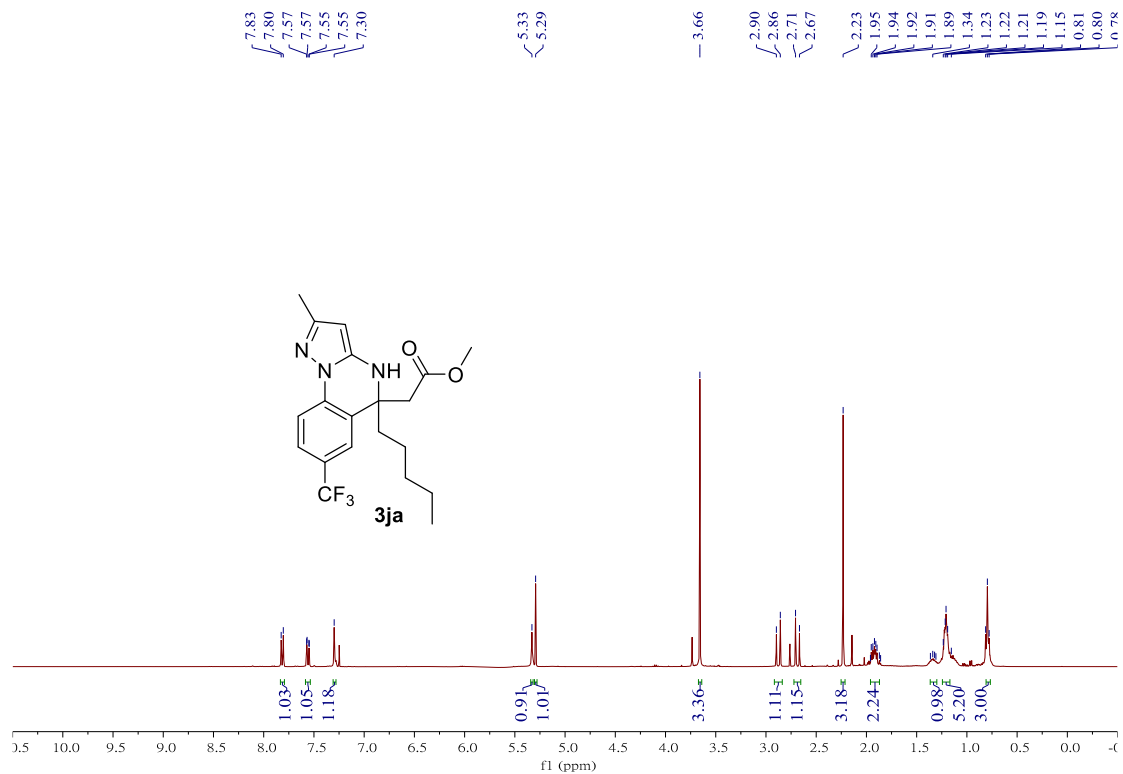

<sup>1</sup>H spectrum (400 MHz) of compound **3ja** in CDCl<sub>3</sub>

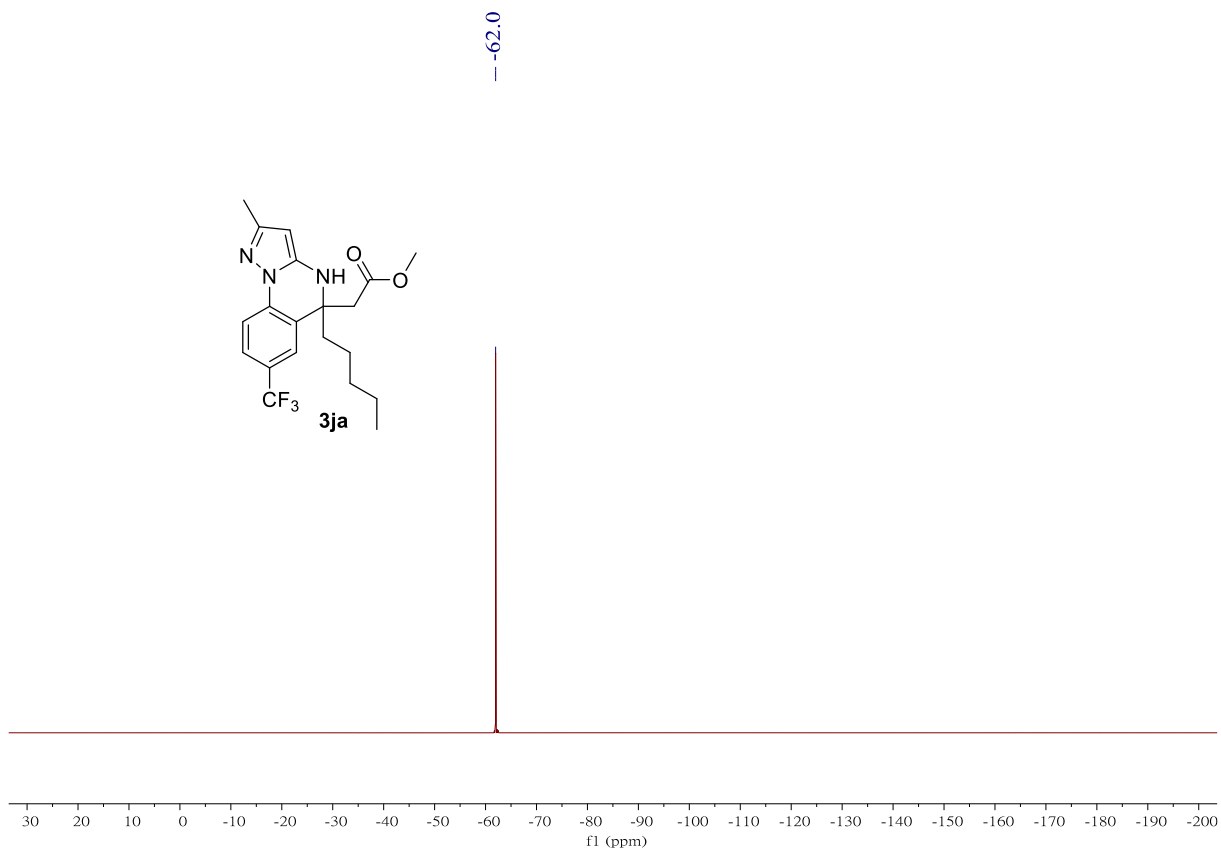

<sup>19</sup>F {<sup>1</sup>H} spectrum (376 MHz) of compound **3ja** in CDCl<sub>3</sub>

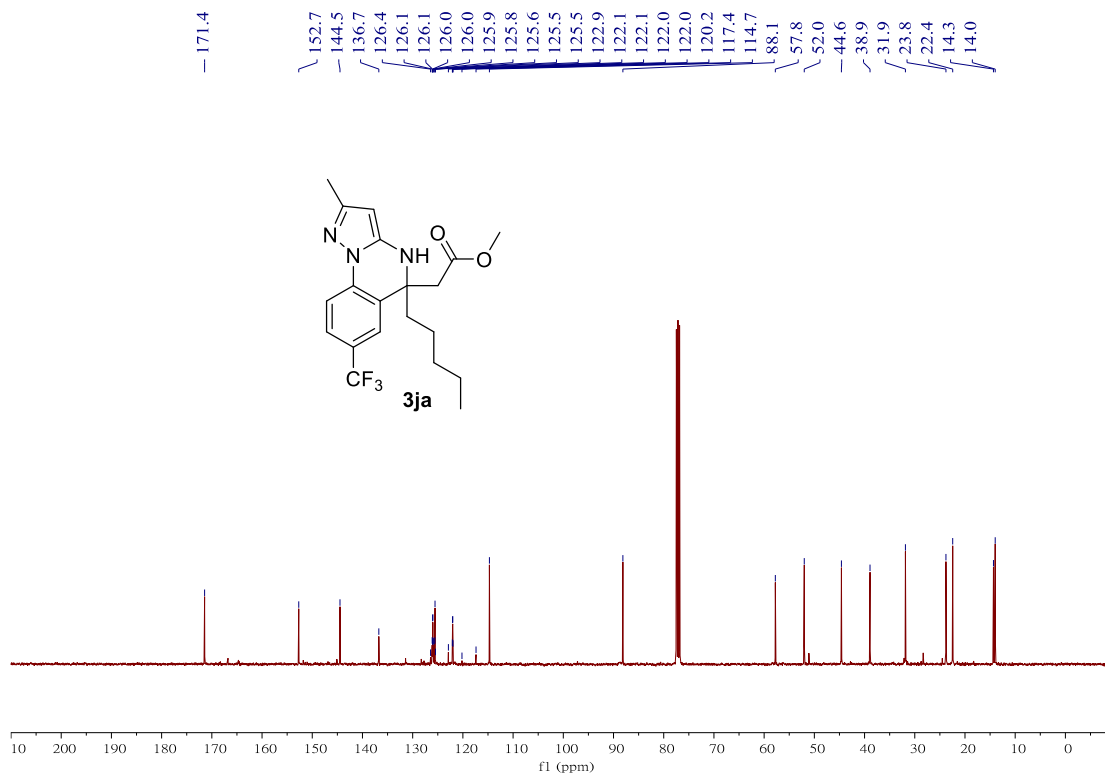

<sup>13</sup>C{<sup>1</sup>H} spectrum (101 MHz) of compound **3ja** in CDCl<sub>3</sub>

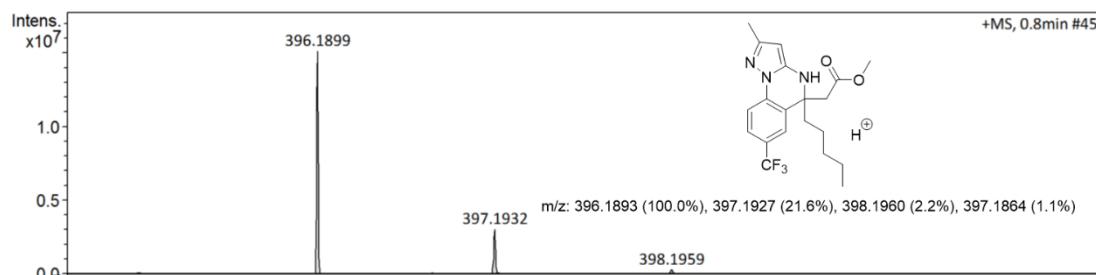

### Display Report

| Meas. m/z | # | Ion Formula                                                                  | m/z      | err [ppm] | mSigma | # Sigma | Score  | rdb | e <sup>-</sup> Conf | N-Rule | Adduct |
|-----------|---|------------------------------------------------------------------------------|----------|-----------|--------|---------|--------|-----|---------------------|--------|--------|
| 396.1899  | 1 | C <sub>20</sub> H <sub>25</sub> F <sub>3</sub> N <sub>3</sub> O <sub>2</sub> | 396.1893 | -1.3      | 18.7   | 1       | 100.00 | 8.5 | even                | ok     | M+H    |

HRMS Mass (ESI) spectrum of compound **3ja**

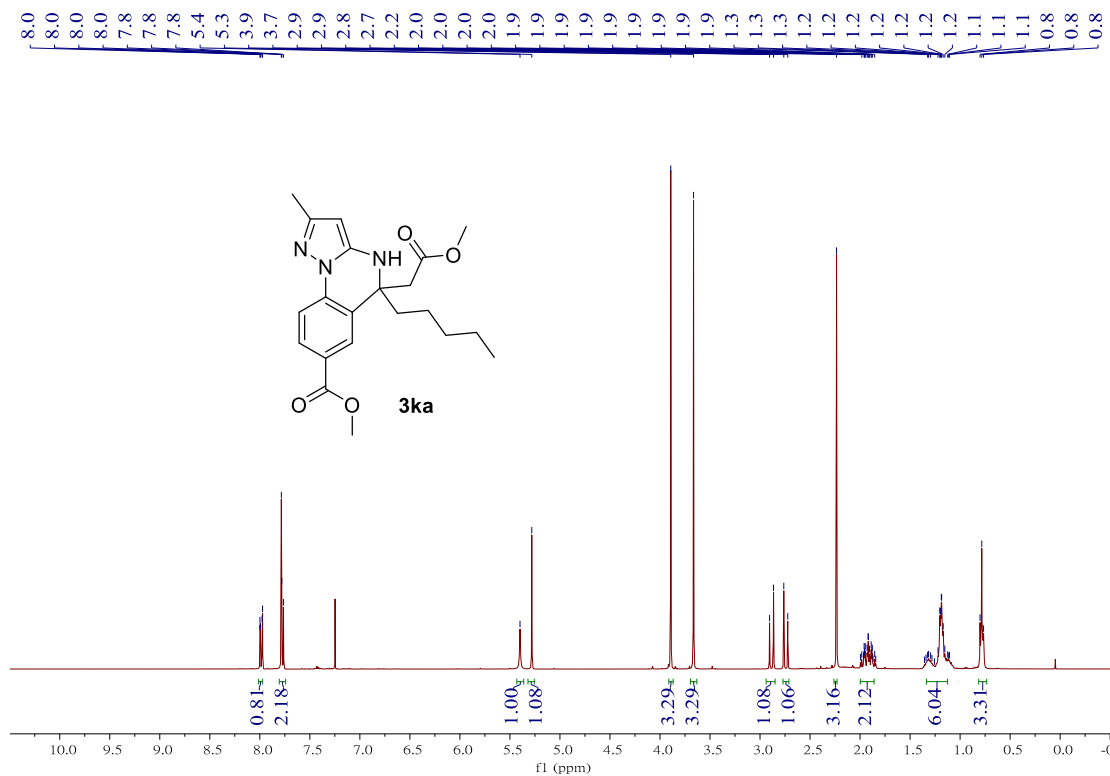

<sup>1</sup>H spectrum (400 MHz) of compound **3ka** in CDCl<sub>3</sub>

- 171.5  
 - 166.5  
 - 152.7  
 - 144.5  
 - 137.3  
 - 130.4  
 - 126.5  
 - 125.5  
 - 124.9  
 - 114.1  
 - 87.8  
 - 57.6  
 - 52.1  
 - 51.8  
 - 44.7  
 - 39.2  
 - 31.8  
 - 23.7  
 - 22.4  
 - 14.2  
 - 13.9

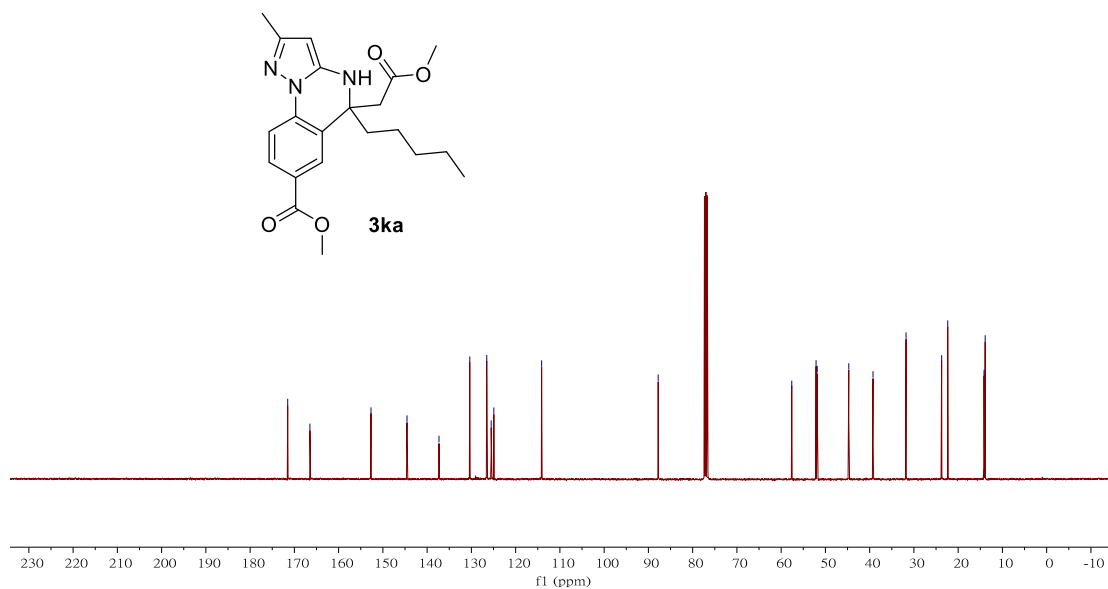

<sup>13</sup>C{<sup>1</sup>H} spectrum (101 MHz) of compound **3ka** in CDCl<sub>3</sub>

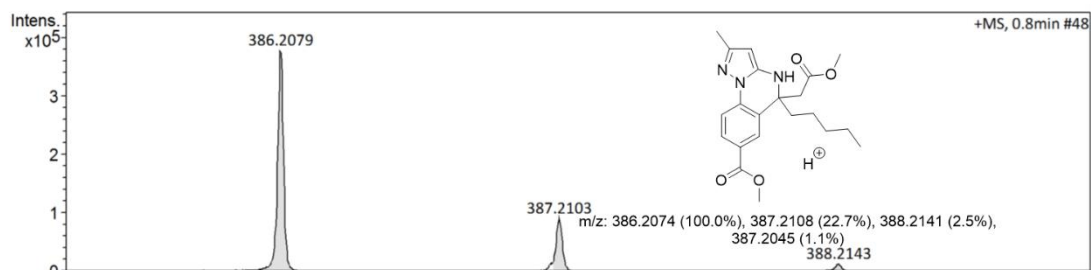

### Display Report

| Meas. m/z | # | Ion Formula                                                   | m/z      | err [ppm] | mSigma | # Sigma | Score  | rdb | e <sup>-</sup> Conf | N-Rule | Adduct |
|-----------|---|---------------------------------------------------------------|----------|-----------|--------|---------|--------|-----|---------------------|--------|--------|
| 386.2079  | 1 | C <sub>21</sub> H <sub>28</sub> N <sub>3</sub> O <sub>4</sub> | 386.2074 | -1.3      | 3.0    | 1       | 100.00 | 9.5 | even                | ok     | M+H    |

### HRMS Mass (ESI) spectrum of compound **3ka**

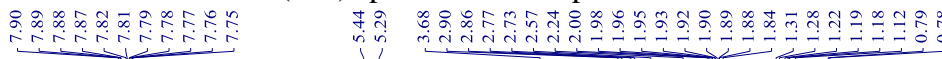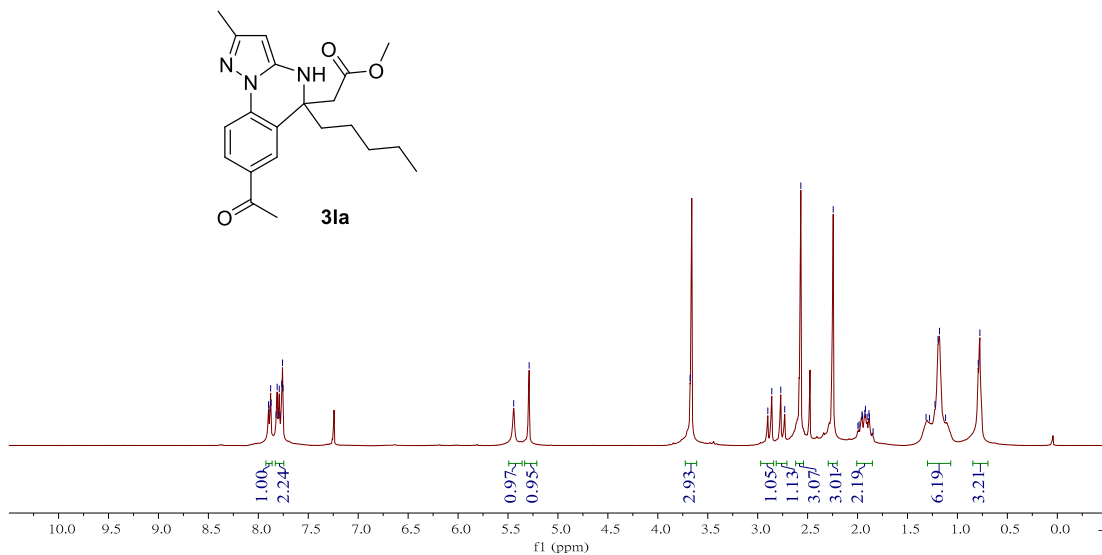

<sup>1</sup>H spectrum (400 MHz) of compound **3la** in CDCl<sub>3</sub>

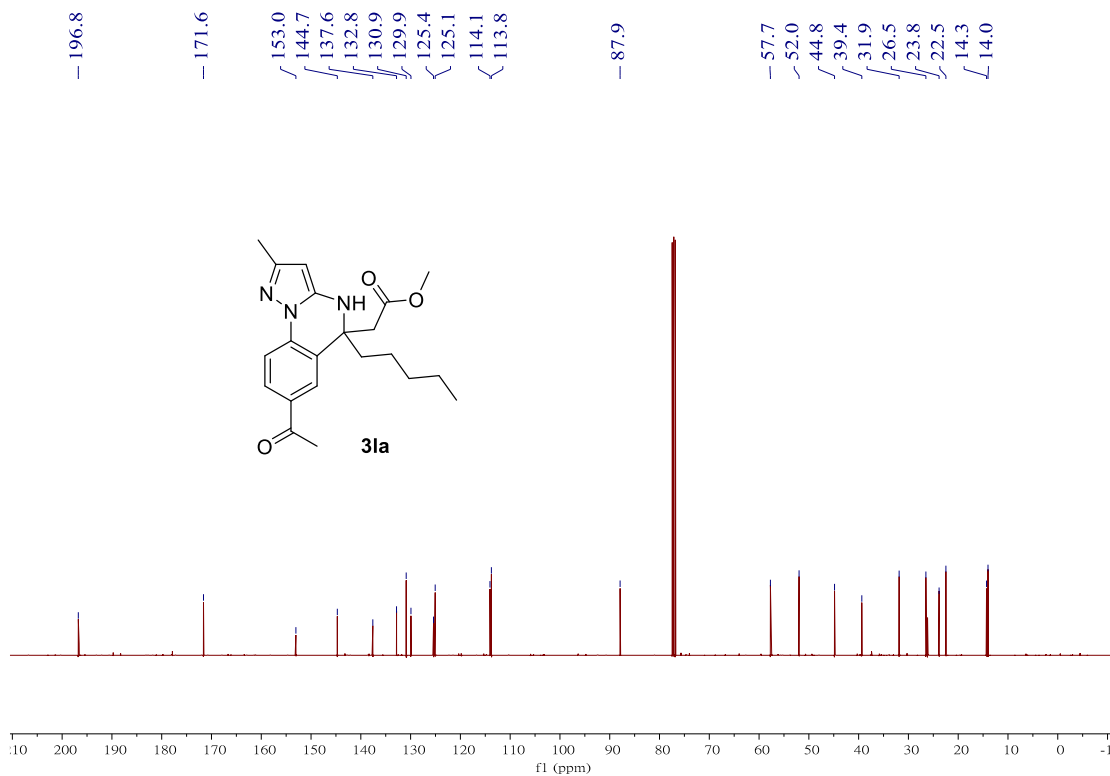

$^{13}\text{C}\{^1\text{H}\}$  spectrum (101 MHz) of compound **3la** in  $\text{CDCl}_3$

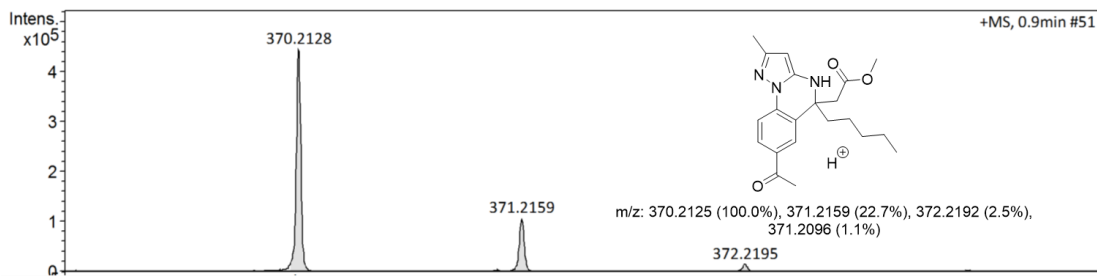

### Display Report

| Meas. m/z | # | Ion Formula                                                   | m/z      | err [ppm] | mSigma | # Sigma | Score  | rdb | e <sup>-</sup> Conf | N-Rule | Adduct |
|-----------|---|---------------------------------------------------------------|----------|-----------|--------|---------|--------|-----|---------------------|--------|--------|
| 370.2128  | 1 | C <sub>21</sub> H <sub>28</sub> N <sub>3</sub> O <sub>3</sub> | 370.2125 | -0.9      | 1.2    | 1       | 100.00 | 9.5 | even                | ok     | M+H    |

HRMS Mass (ESI) spectrum of compound **3la**

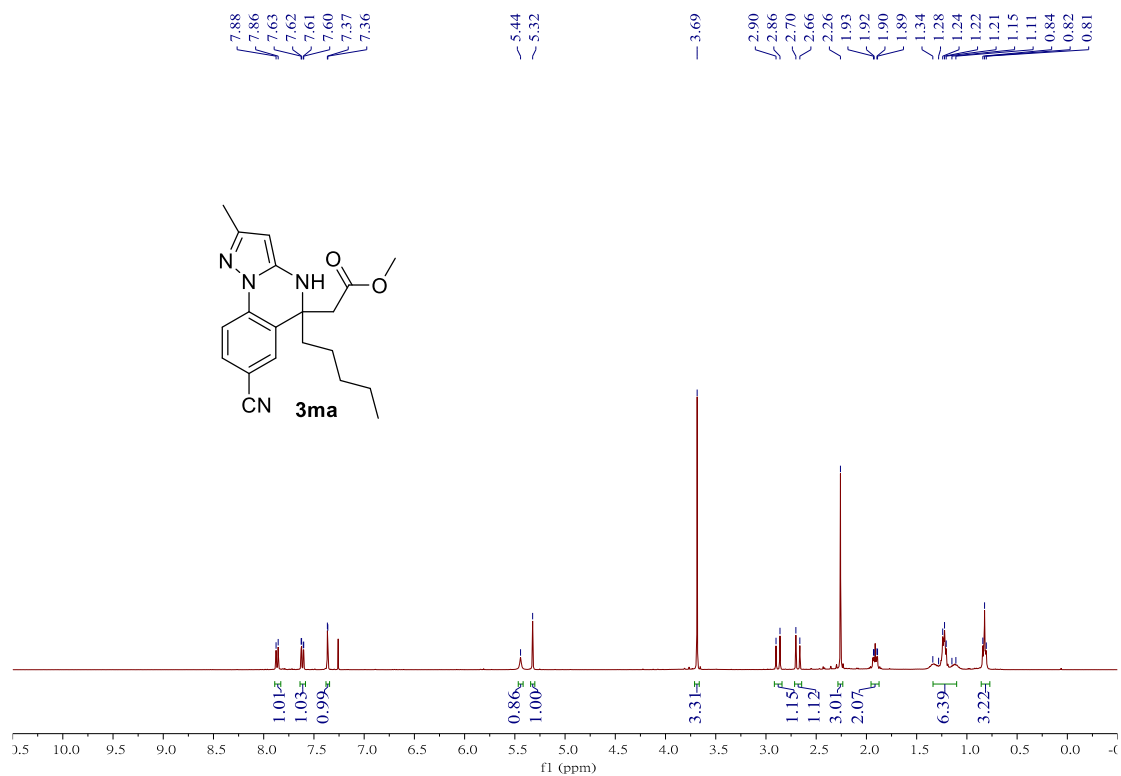

**<sup>1</sup>H spectrum (400 MHz) of compound **3ma** in CDCl<sub>3</sub>**

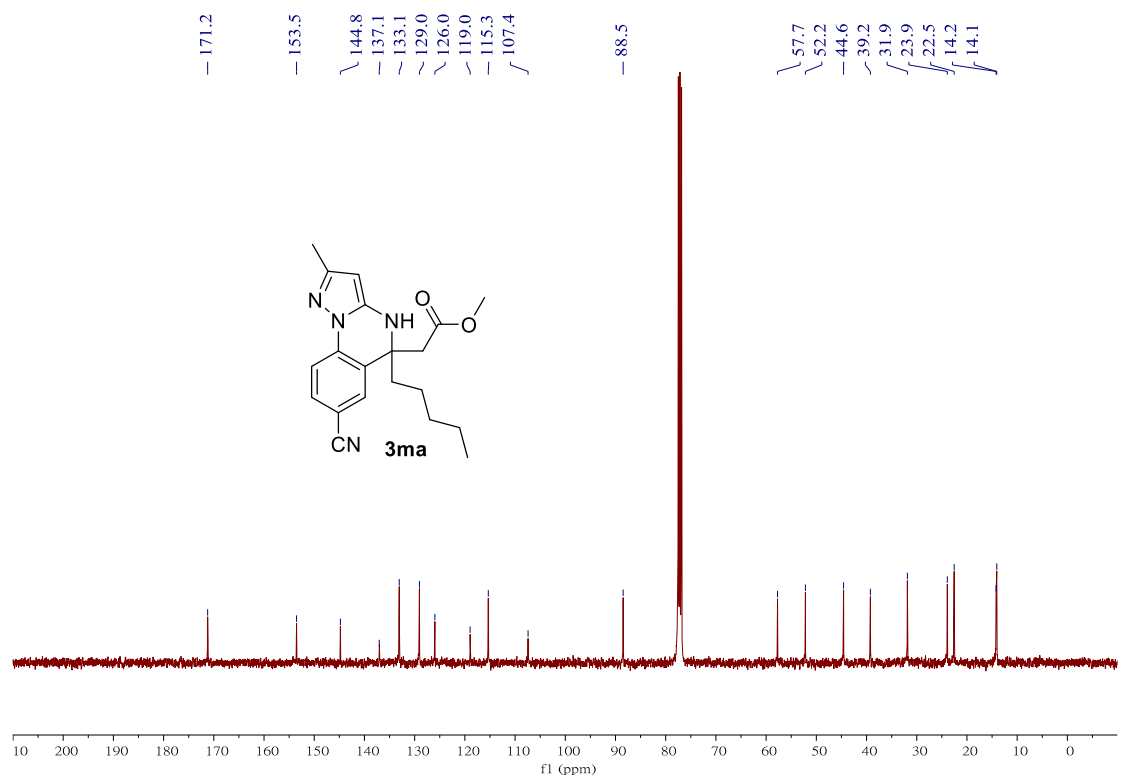

**<sup>13</sup>C{<sup>1</sup>H} spectrum (101 MHz) of compound **3ma** in CDCl<sub>3</sub>**

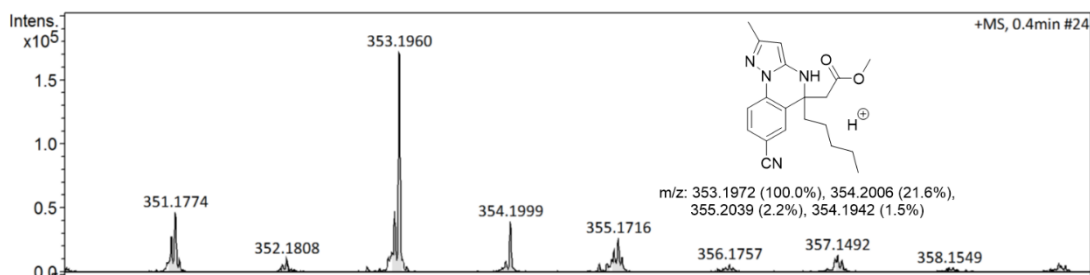

### Display Report

| Meas. m/z | # | Ion Formula                                                   | m/z      | err [ppm] | mSigma | # Sigma | Score  | rdb  | e <sup>-</sup> Conf | N-Rule | Adduct |
|-----------|---|---------------------------------------------------------------|----------|-----------|--------|---------|--------|------|---------------------|--------|--------|
| 353.1960  | 1 | C <sub>20</sub> H <sub>25</sub> N <sub>4</sub> O <sub>2</sub> | 353.1972 | -3.4      | 19.9   | 1       | 100.00 | 10.5 | even                | ok     | M+H    |

### HRMS Mass (ESI) spectrum of compound **3ma**

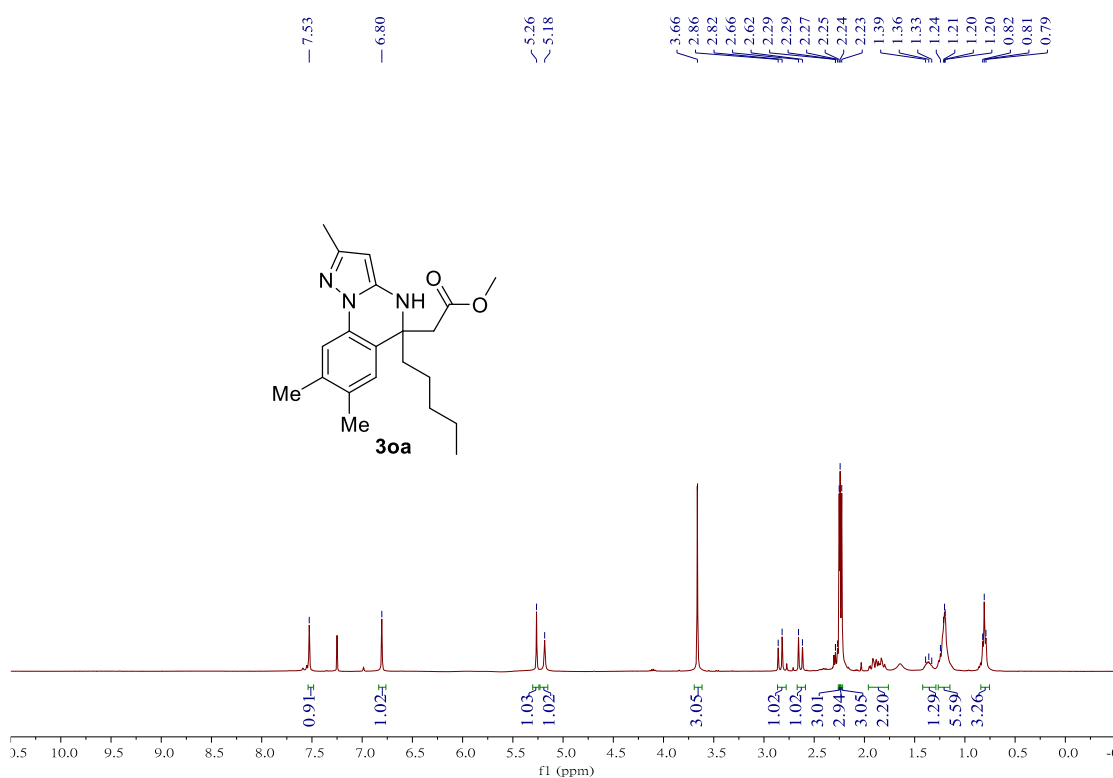

### <sup>1</sup>H spectrum (400 MHz) of compound **3oa** in CDCl<sub>3</sub>

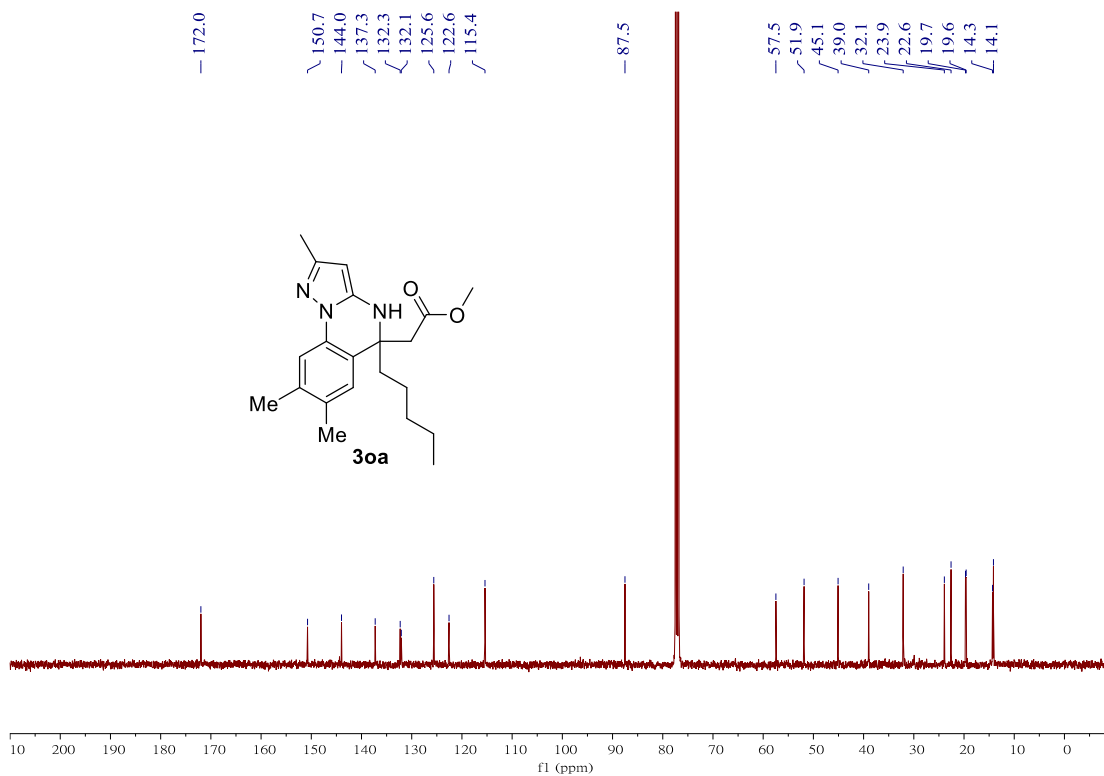

$^{13}\text{C}\{^1\text{H}\}$  spectrum (101 MHz) of compound **30a** in  $\text{CDCl}_3$

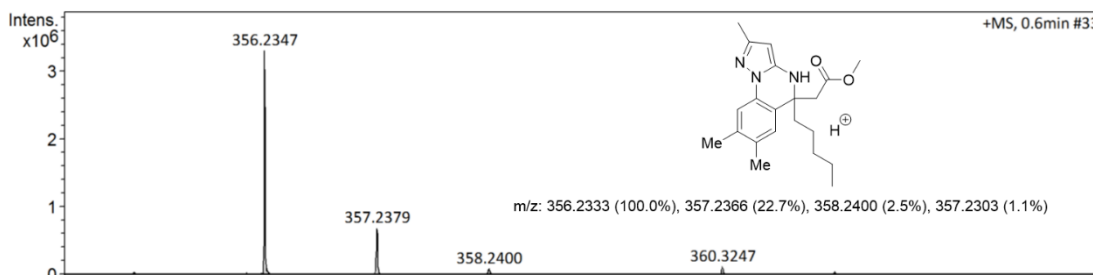

### Display Report

| Meas. m/z | # | Ion Formula                                                   | m/z      | err [ppm] | mSigma | # Sigma | Score  | rdb | e <sup>-</sup> Conf | N-Rule | Adduct |
|-----------|---|---------------------------------------------------------------|----------|-----------|--------|---------|--------|-----|---------------------|--------|--------|
| 356.2347  | 1 | C <sub>21</sub> H <sub>30</sub> N <sub>3</sub> O <sub>2</sub> | 356.2333 | 4.1       | 19.7   | 1       | 100.00 | 8.5 | even                | ok     | M+H    |

HRMS Mass (ESI) spectrum of compound **30a**



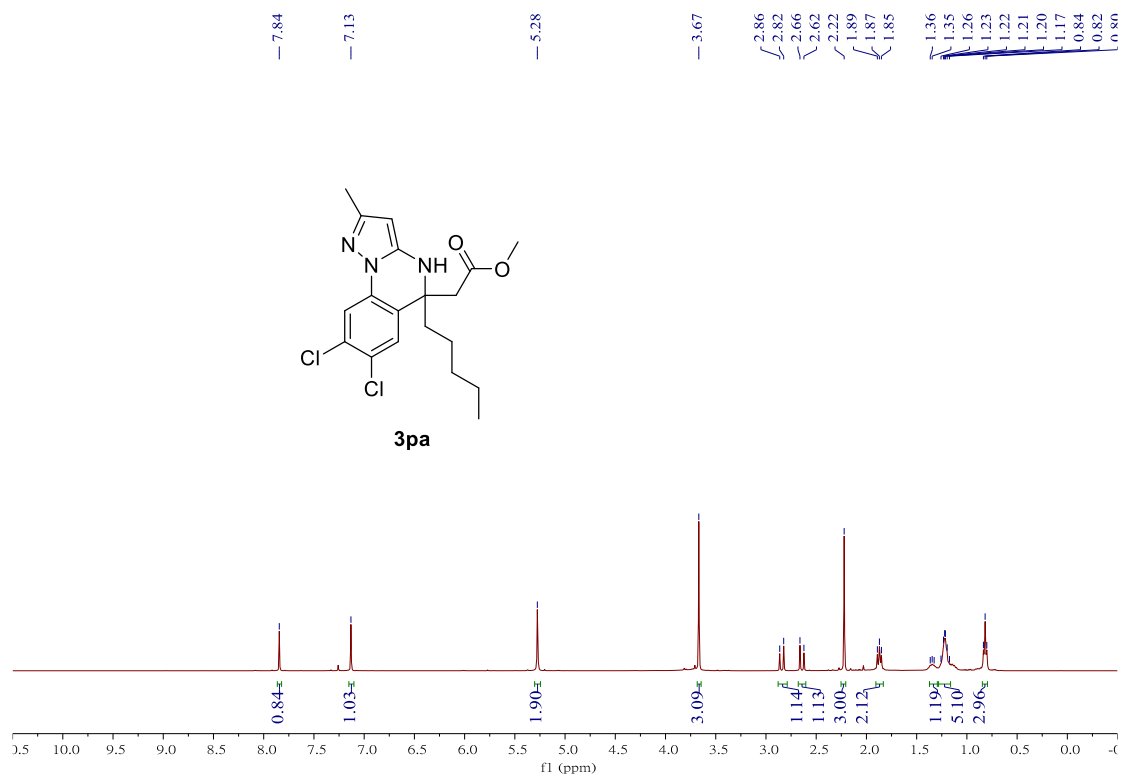

<sup>1</sup>H spectrum (400 MHz) of compound **3pa** in CDCl<sub>3</sub>

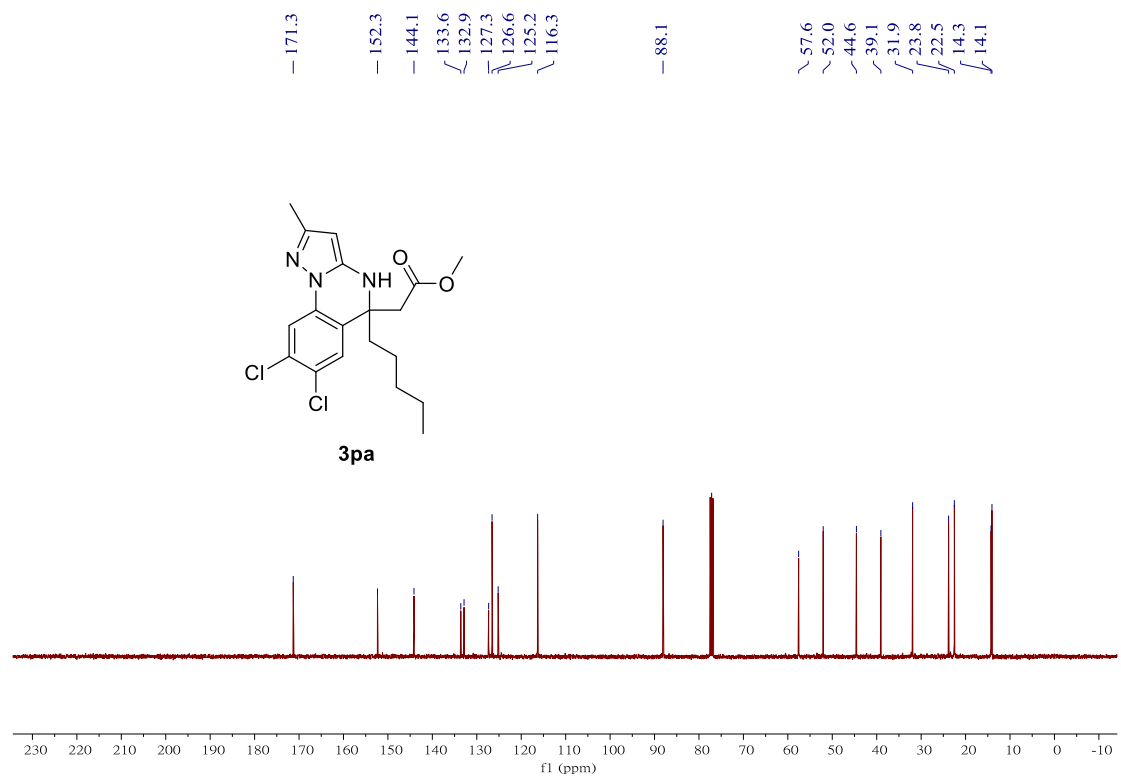

<sup>13</sup>C{<sup>1</sup>H} spectrum (101 MHz) of compound **3pa** in CDCl<sub>3</sub>

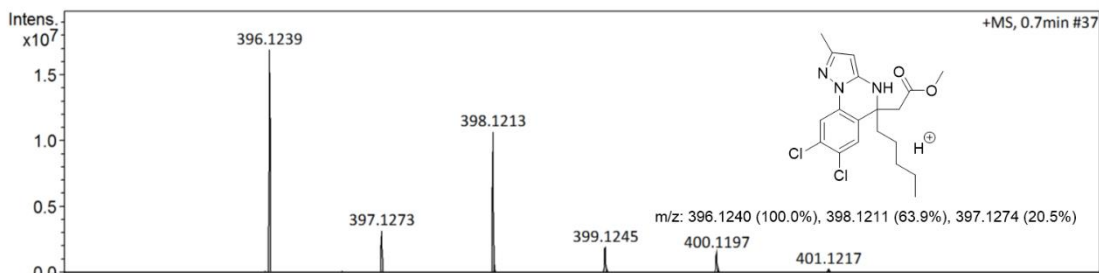

### Display Report

| Meas. m/z | # | Ion Formula                                                                   | m/z      | err [ppm] | mSigma | # Sigma | Score  | rdb | e <sup>-</sup> Conf | N-Rule | Adduct |
|-----------|---|-------------------------------------------------------------------------------|----------|-----------|--------|---------|--------|-----|---------------------|--------|--------|
| 396.1239  | 1 | C <sub>19</sub> H <sub>24</sub> Cl <sub>2</sub> N <sub>3</sub> O <sub>2</sub> | 396.1240 | -0.2      | 25.4   | 1       | 100.00 | 8.5 | even                | ok     | M+H    |

### HRMS Mass (ESI) spectrum of compound 3pa

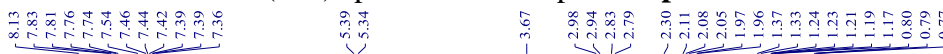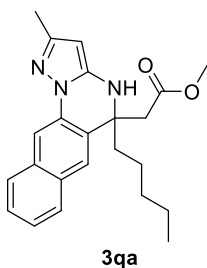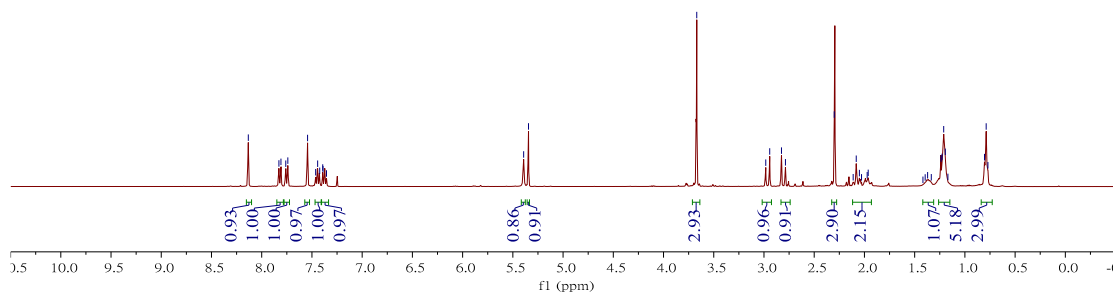

<sup>1</sup>H spectrum (400 MHz) of compound **3qa** in CDCl<sub>3</sub>

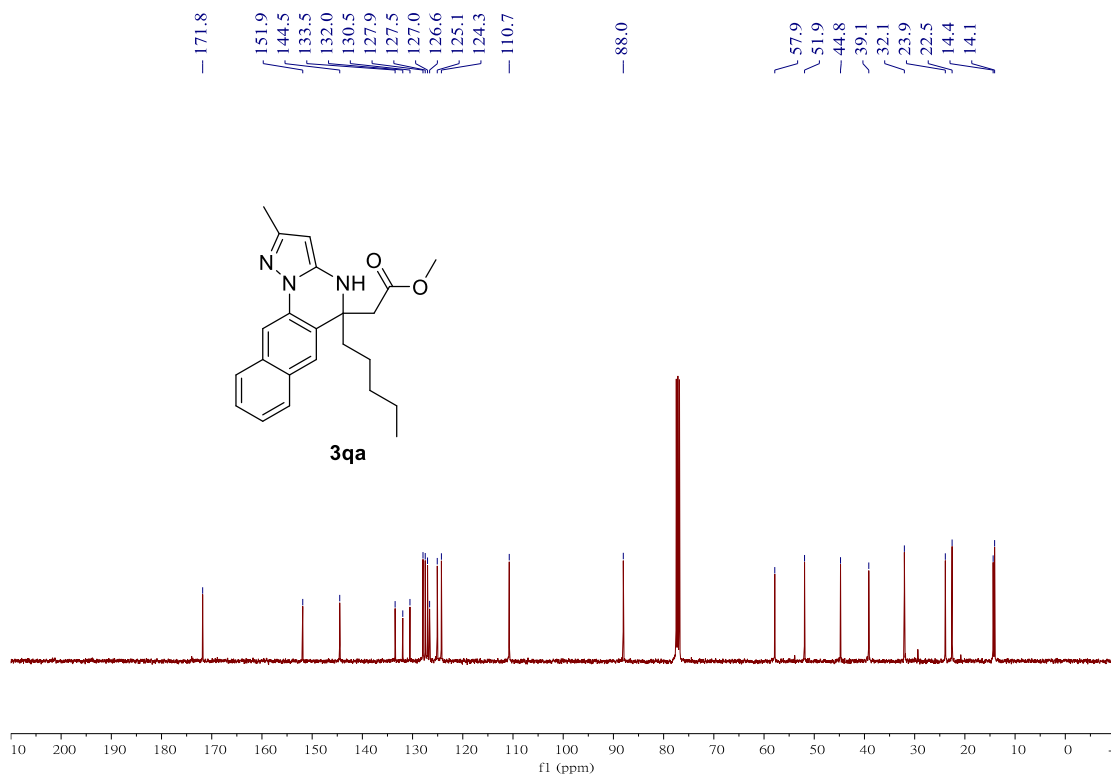

$^{13}\text{C}\{^1\text{H}\}$  spectrum (101 MHz) of compound **3qa** in  $\text{CDCl}_3$

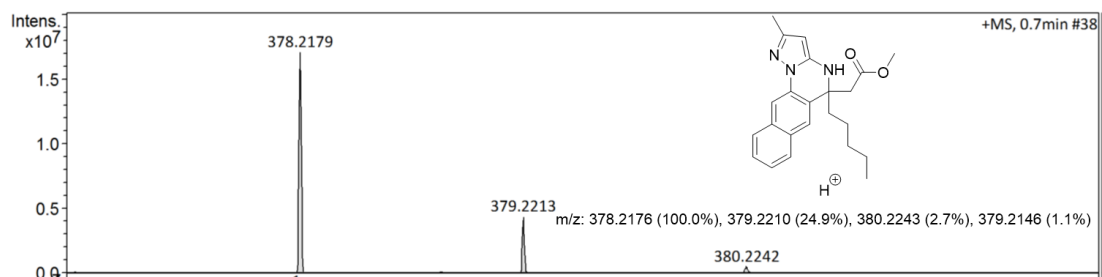

### Display Report

| Meas. m/z | # | Ion Formula                                                   | m/z      | err [ppm] | mSigma | # Sigma | Score  | rdb  | e <sup>-</sup> Conf | N-Rule | Adduct |
|-----------|---|---------------------------------------------------------------|----------|-----------|--------|---------|--------|------|---------------------|--------|--------|
| 378.2179  | 1 | C <sub>23</sub> H <sub>28</sub> N <sub>3</sub> O <sub>2</sub> | 378.2176 | 0.8       | 6.1    | 1       | 100.00 | 11.5 | even                | ok     | M+H    |

### HRMS Mass (ESI) spectrum of compound **3qa**

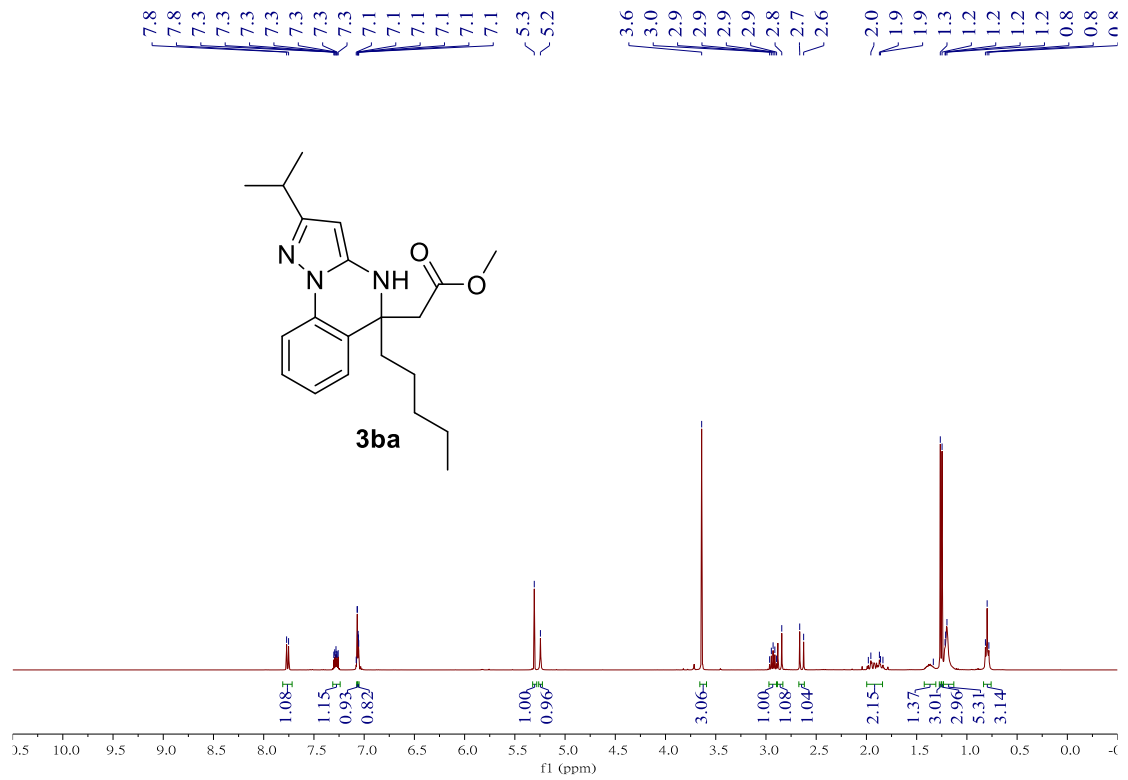

$^1\text{H}$  spectrum (400 MHz) of compound **3ba** in  $\text{CDCl}_3$

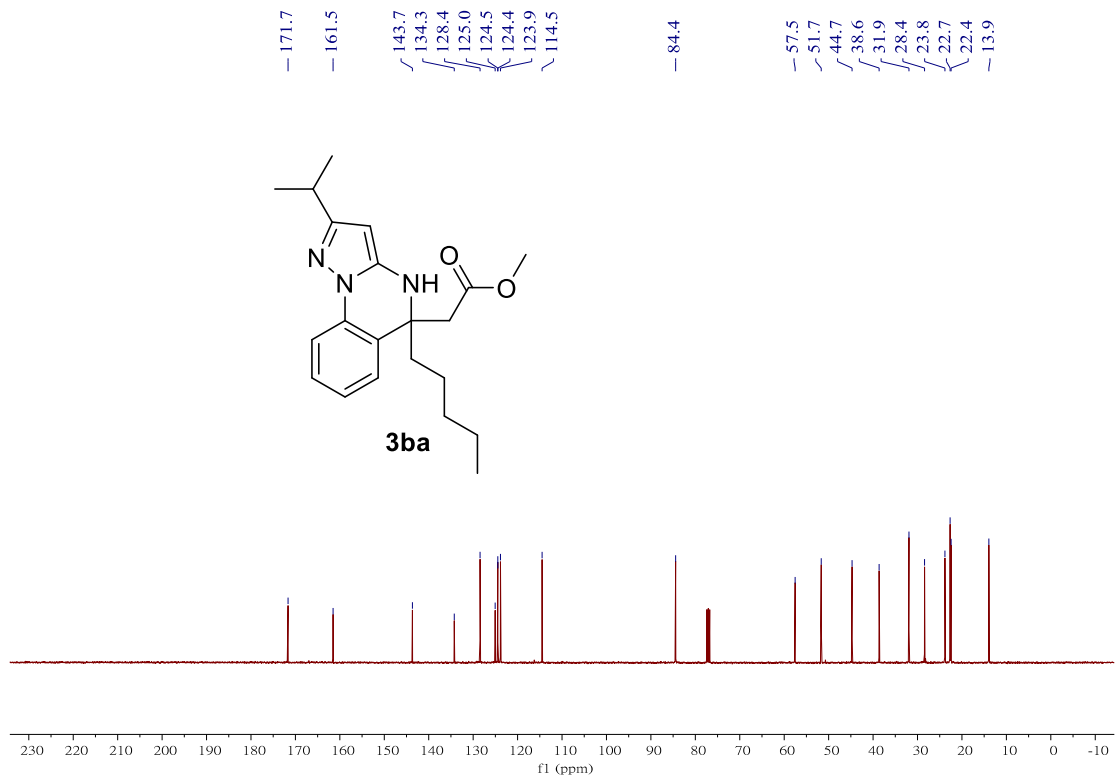

$^{13}\text{C}\{^1\text{H}\}$  spectrum (101 MHz) of compound **3ba** in  $\text{CDCl}_3$

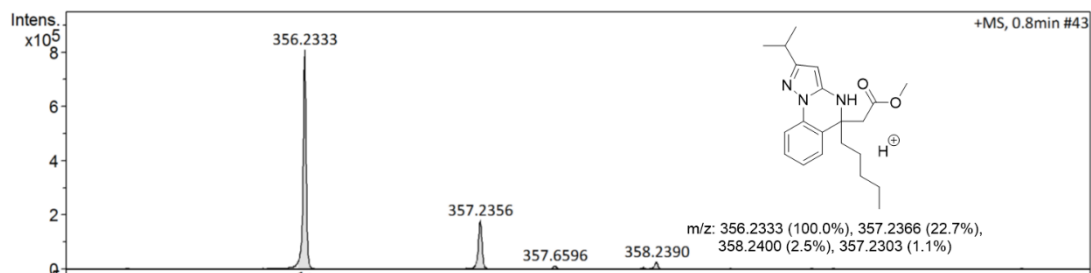

### Display Report

| Meas. m/z | # | Ion Formula                                                   | m/z      | err [ppm] | mSigma | # Sigma | Score  | rdb | e <sup>-</sup> Conf | N-Rule | Adduct |
|-----------|---|---------------------------------------------------------------|----------|-----------|--------|---------|--------|-----|---------------------|--------|--------|
| 356.2333  | 1 | C <sub>21</sub> H <sub>30</sub> N <sub>3</sub> O <sub>2</sub> | 356.2333 | 0.2       | 12.4   | 1       | 100.00 | 8.5 | even                | ok     | M+H    |

### HRMS Mass (ESI) spectrum of compound **3ba**

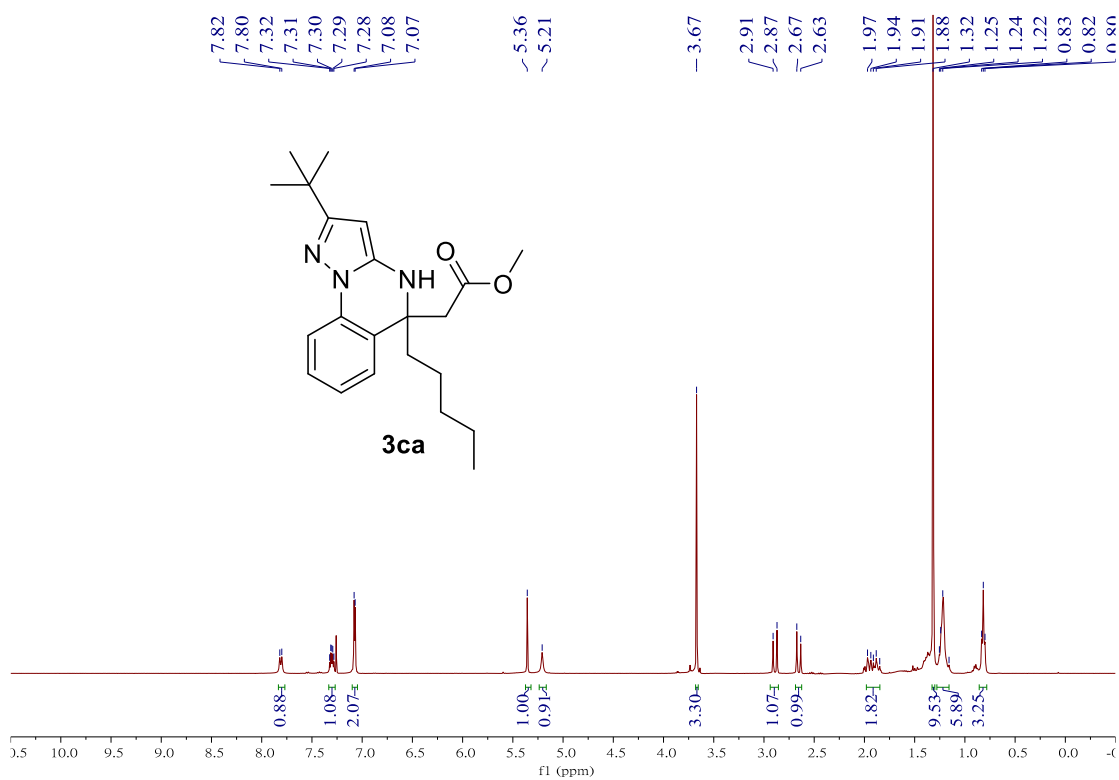

### <sup>1</sup>H spectrum (400 MHz) of compound **3ca** in CDCl<sub>3</sub>

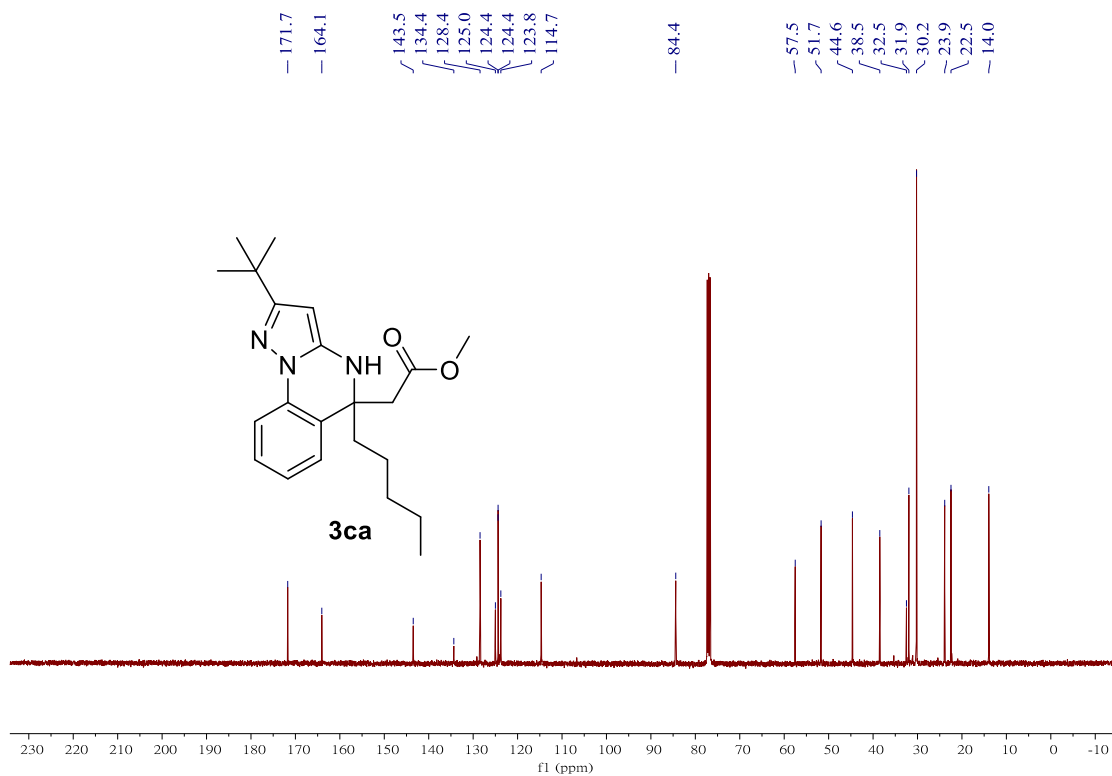

$^{13}\text{C}\{^1\text{H}\}$  spectrum (101 MHz) of compound **3ca** in  $\text{CDCl}_3$

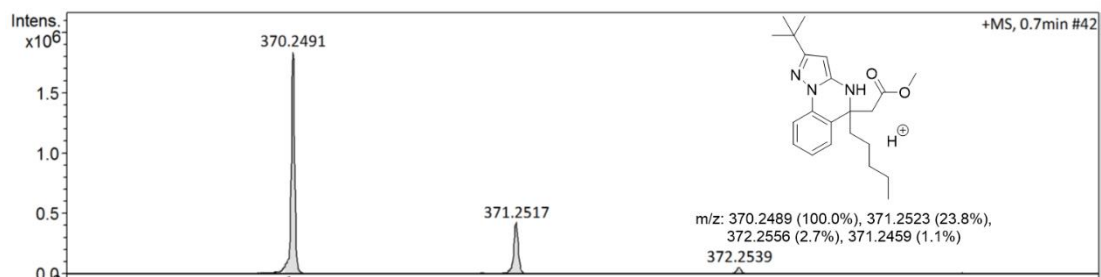

### Display Report

| Meas. m/z | # | Ion Formula                                                   | m/z      | err [ppm] | mSigma | # Sigma | Score  | rdb | e <sup>-</sup> Conf | N-Rule | Adduct |
|-----------|---|---------------------------------------------------------------|----------|-----------|--------|---------|--------|-----|---------------------|--------|--------|
| 370.2491  | 1 | C <sub>22</sub> H <sub>32</sub> N <sub>3</sub> O <sub>2</sub> | 370.2489 | -0.6      | 14.5   | 1       | 100.00 | 8.5 | even                | ok     | M+H    |

HRMS Mass (ESI) spectrum of compound **3ca**

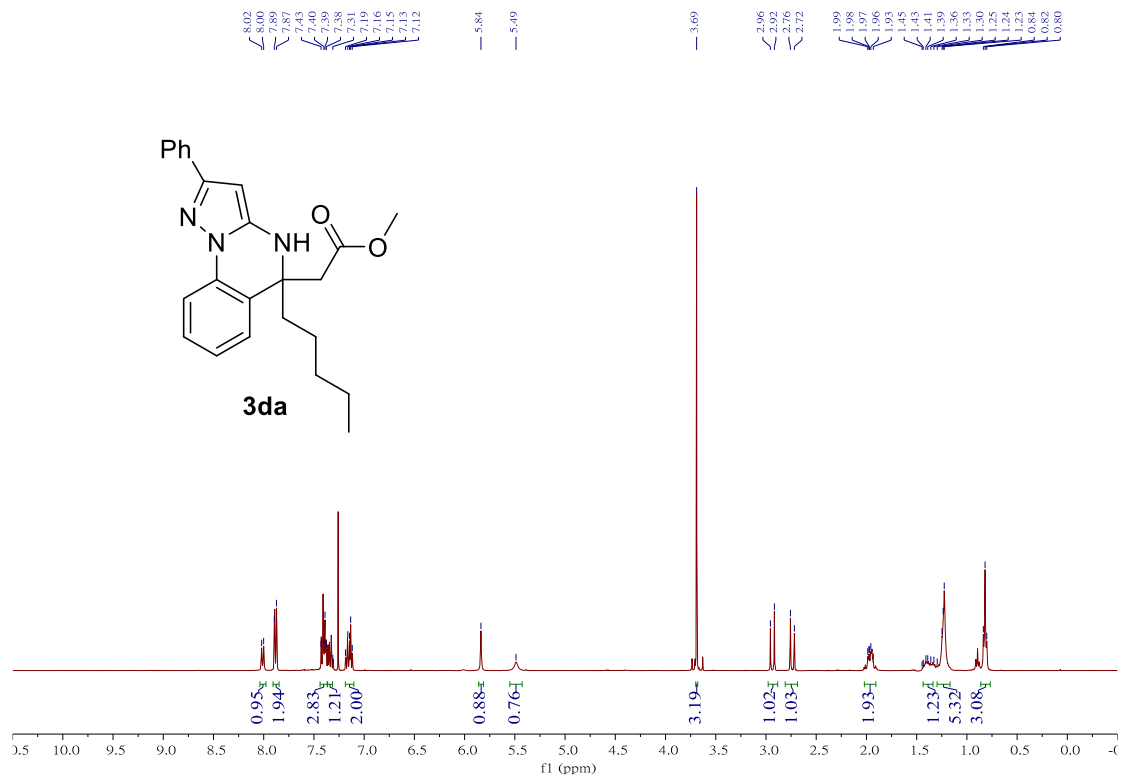

<sup>1</sup>H spectrum (400 MHz) of compound **3da** in CDCl<sub>3</sub>

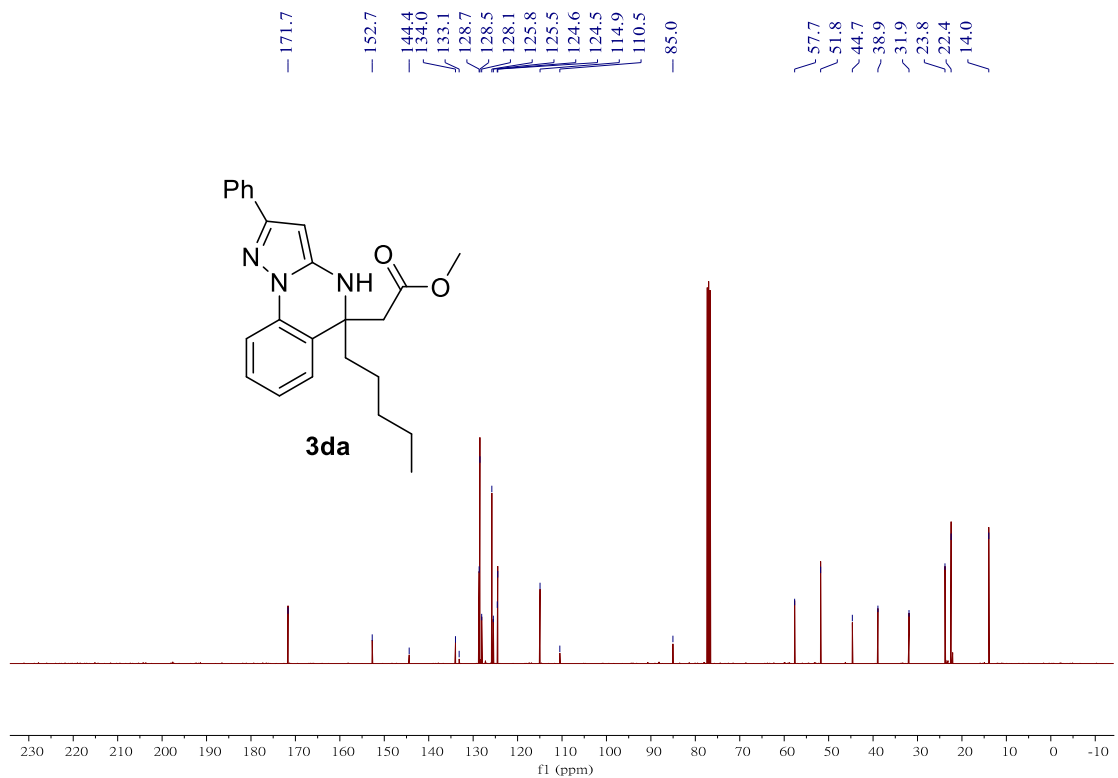

$^{13}\text{C}\{^1\text{H}\}$  spectrum (101 MHz) of compound **3da** in  $\text{CDCl}_3$

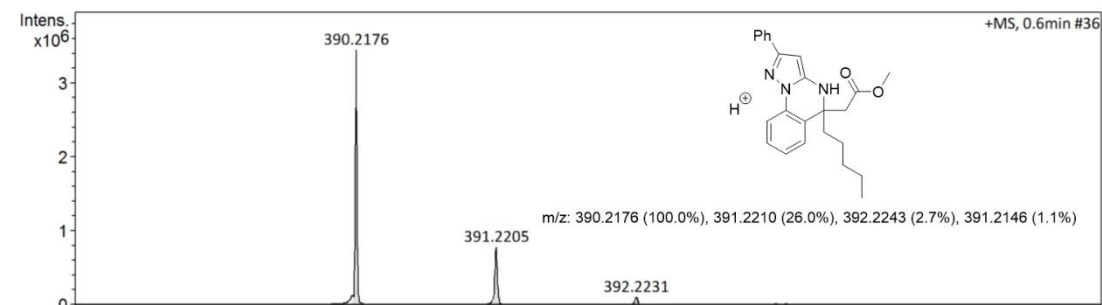

Display Report

| Meas. m/z | # | Ion Formula                                                   | m/z      | err [ppm] | mSigma | # Sigma | Score  | rdb  | e <sup>-</sup> Conf | N-Rule | Adduct |
|-----------|---|---------------------------------------------------------------|----------|-----------|--------|---------|--------|------|---------------------|--------|--------|
| 390.2176  | 1 | C <sub>24</sub> H <sub>28</sub> N <sub>3</sub> O <sub>2</sub> | 390.2176 | 0.1       | 24.8   | 1       | 100.00 | 12.5 | even                | ok     | M+H    |

HRMS Mass (ESI) spectrum of compound **3da**

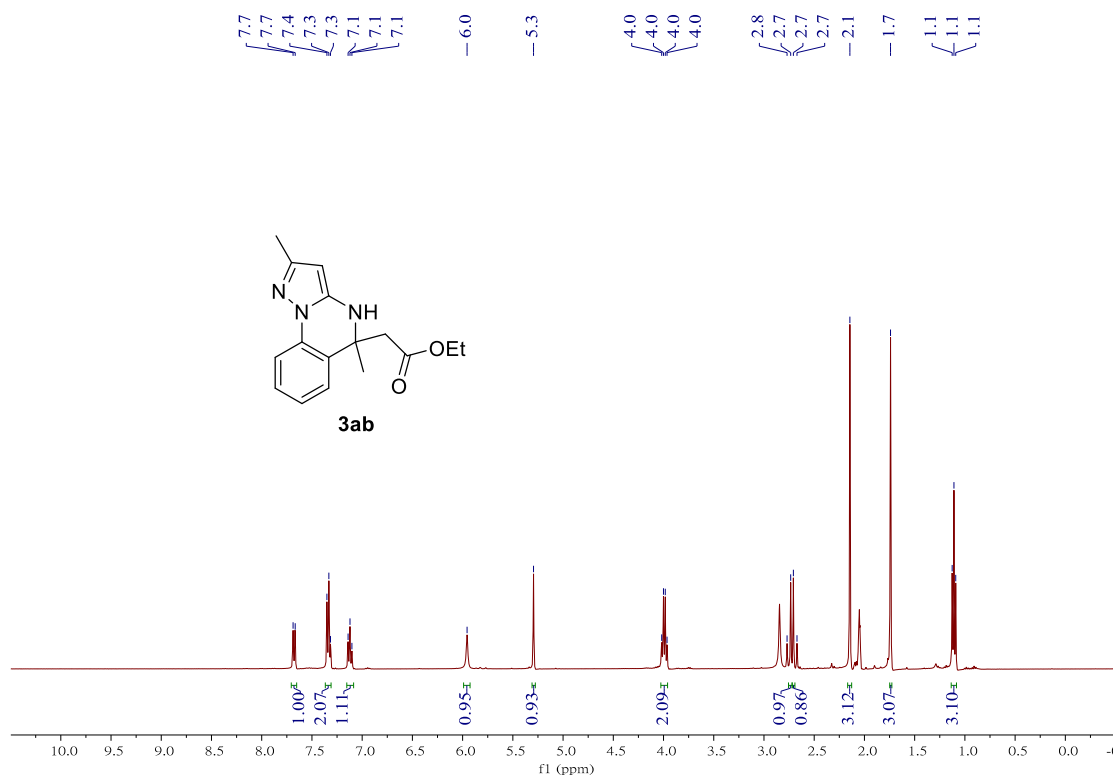

$^1\text{H}$  spectrum (400 MHz) of compound **3ab** in  $\text{acetone-}d_6$



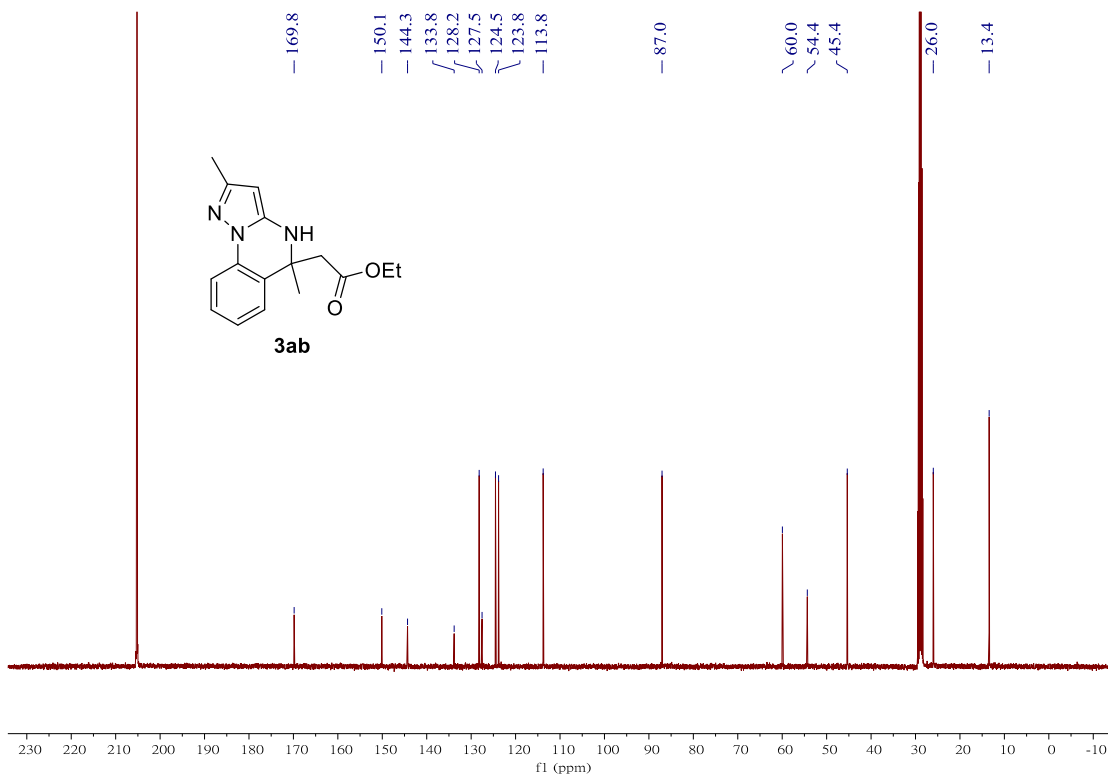

$^{13}\text{C}\{1\text{H}\}$  spectrum (101 MHz) of compound **3ab** in acetone- $d^6$

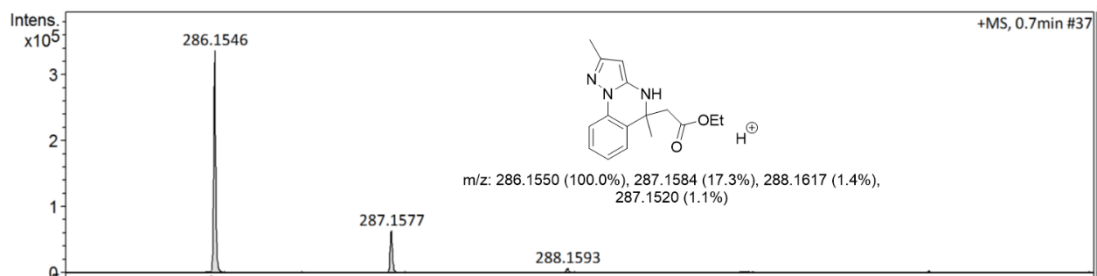

### Display Report

| Meas. m/z | # | Ion Formula                                                   | m/z      | err [ppm] | mSigma | # Sigma | Score  | rdB | e <sup>-</sup> Conf | N-Rule | Adduct |
|-----------|---|---------------------------------------------------------------|----------|-----------|--------|---------|--------|-----|---------------------|--------|--------|
| 286.1546  | 1 | C <sub>16</sub> H <sub>20</sub> N <sub>3</sub> O <sub>2</sub> | 286.1550 | -1.3      | 1.3    | 1       | 100.00 | 8.5 | even                | ok     | M+H    |

HRMS Mass (ESI) spectrum of compound **3ab**

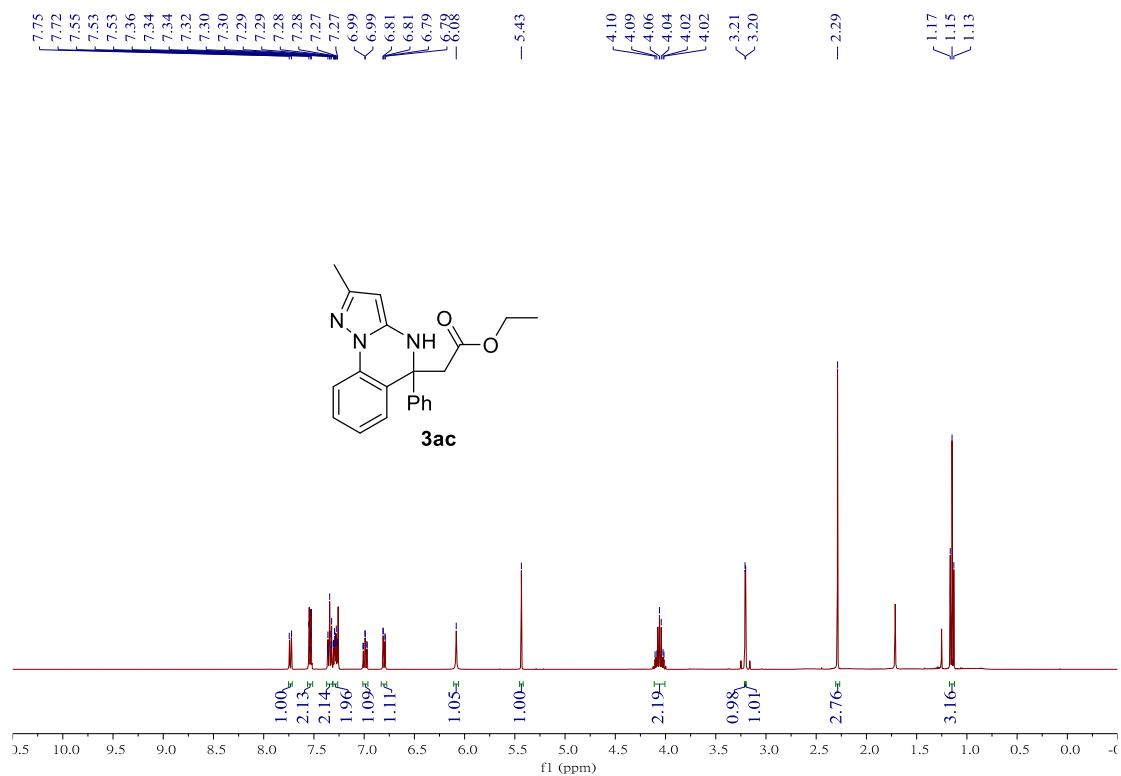

<sup>1</sup>H spectrum (400 MHz) of compound **3ac** in CDCl<sub>3</sub>

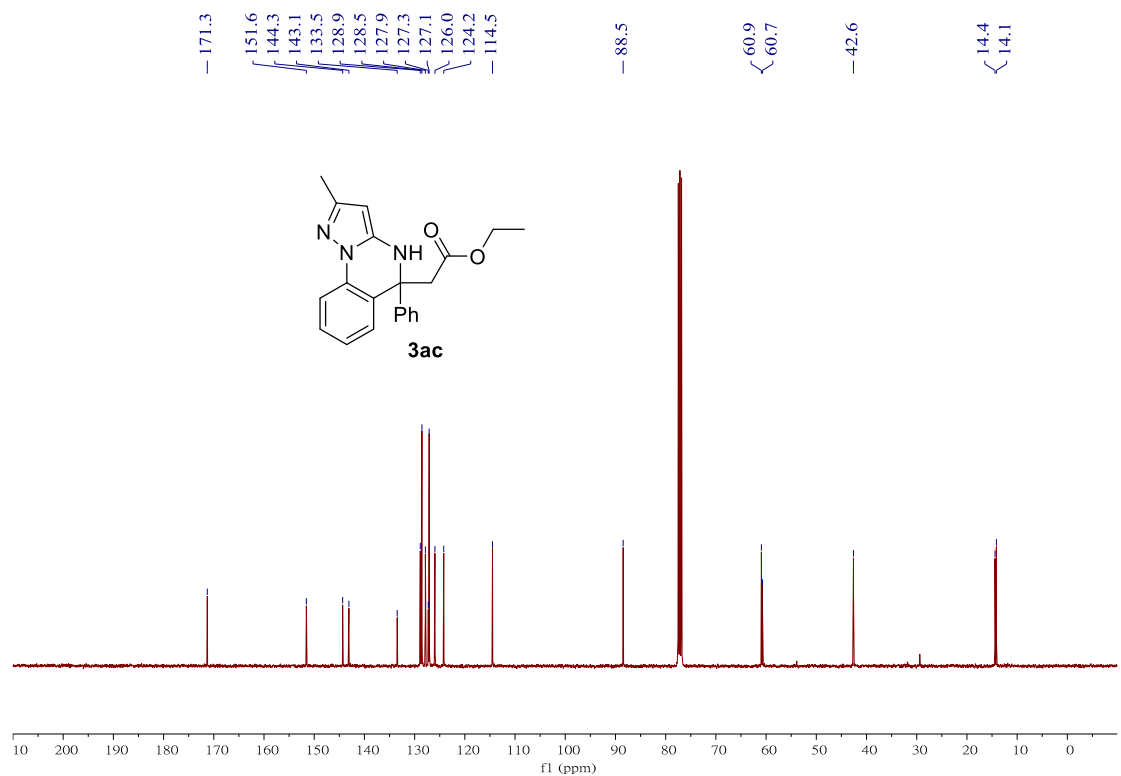

<sup>13</sup>C{<sup>1</sup>H} spectrum (101 MHz) of compound **3ac** in CDCl<sub>3</sub>

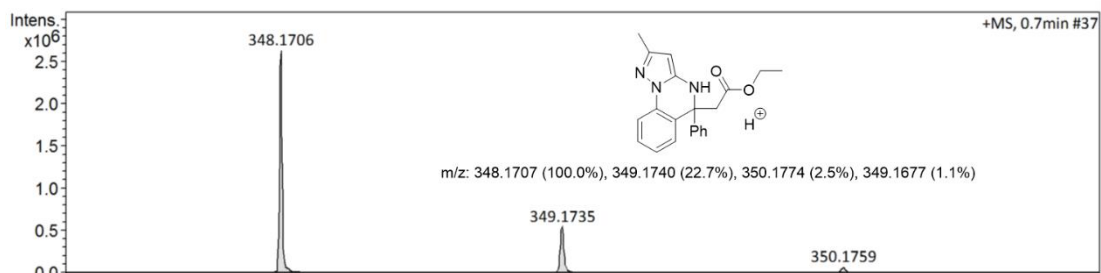

### Display Report

| Meas. m/z | # | Ion Formula | m/z      | err [ppm] | mSigma | # Sigma | Score  | rdb  | e <sup>-</sup> Conf | N-Rule | Adduct |
|-----------|---|-------------|----------|-----------|--------|---------|--------|------|---------------------|--------|--------|
| 348.1706  | 1 | C21H22N3O2  | 348.1707 | 0.2       | 20.6   | 1       | 100.00 | 12.5 | even                | ok     | M+H    |

### HRMS Mass (ESI) spectrum of compound **3ac**

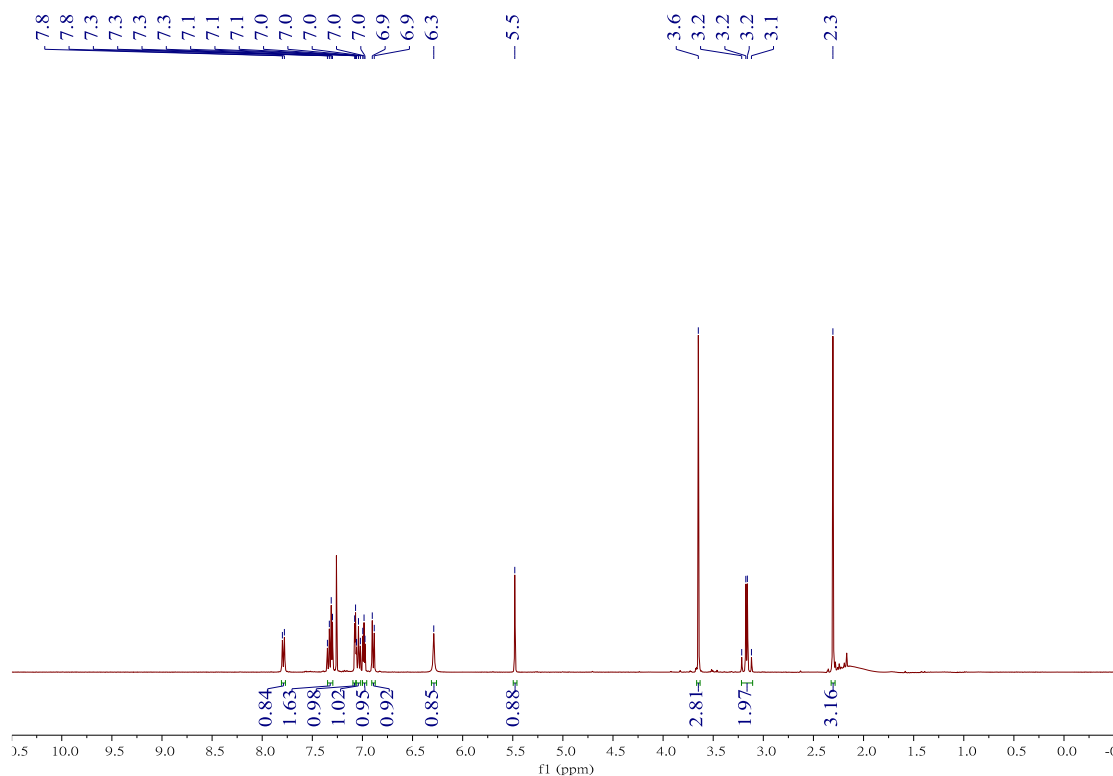

<sup>1</sup>H spectrum (400 MHz) of compound **3ad** in CDCl<sub>3</sub>

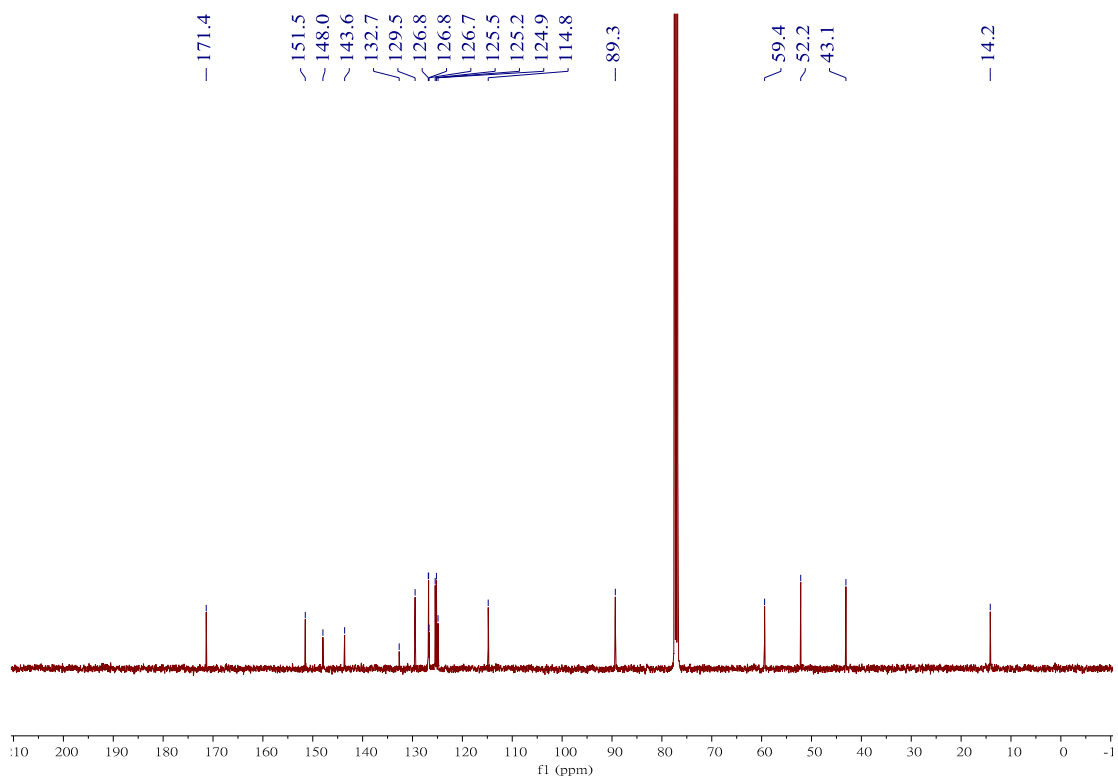

$^{13}\text{C}\{^1\text{H}\}$  spectrum (101 MHz) of compound **3ad** in  $\text{CDCl}_3$

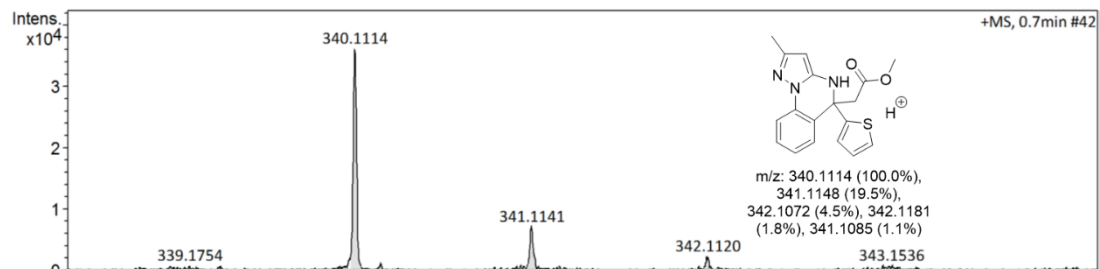

### Display Report

| Meas. m/z | # | Ion Formula                                                     | m/z      | err [ppm] | mSigma | # Sigma | Score  | rdb  | e <sup>-</sup> Conf | N-Rule | Adduct |
|-----------|---|-----------------------------------------------------------------|----------|-----------|--------|---------|--------|------|---------------------|--------|--------|
| 340.1114  | 1 | C <sub>18</sub> H <sub>18</sub> N <sub>3</sub> O <sub>2</sub> S | 340.1114 | 0.1       | 11.3   | 1       | 100.00 | 11.5 | even                | ok     | M+H    |

HRMS Mass (ESI) spectrum of compound **3ad**

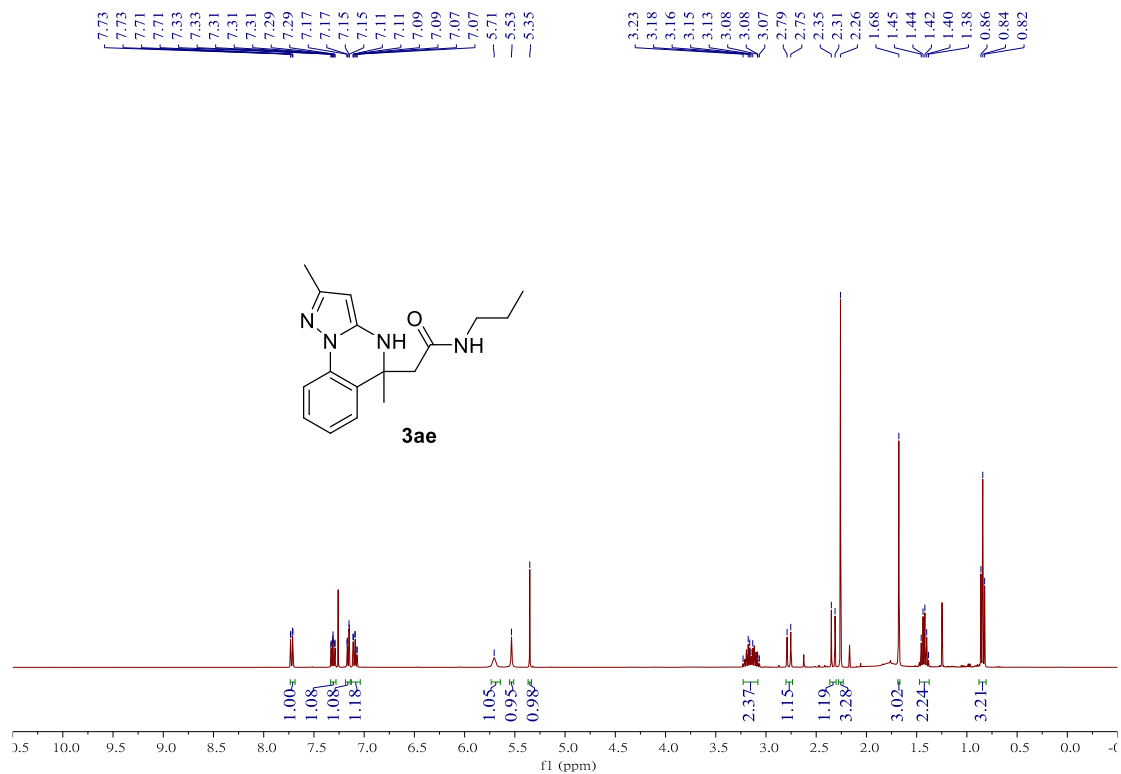

<sup>1</sup>H spectrum (400 MHz) of compound **3ae** in CDCl<sub>3</sub>

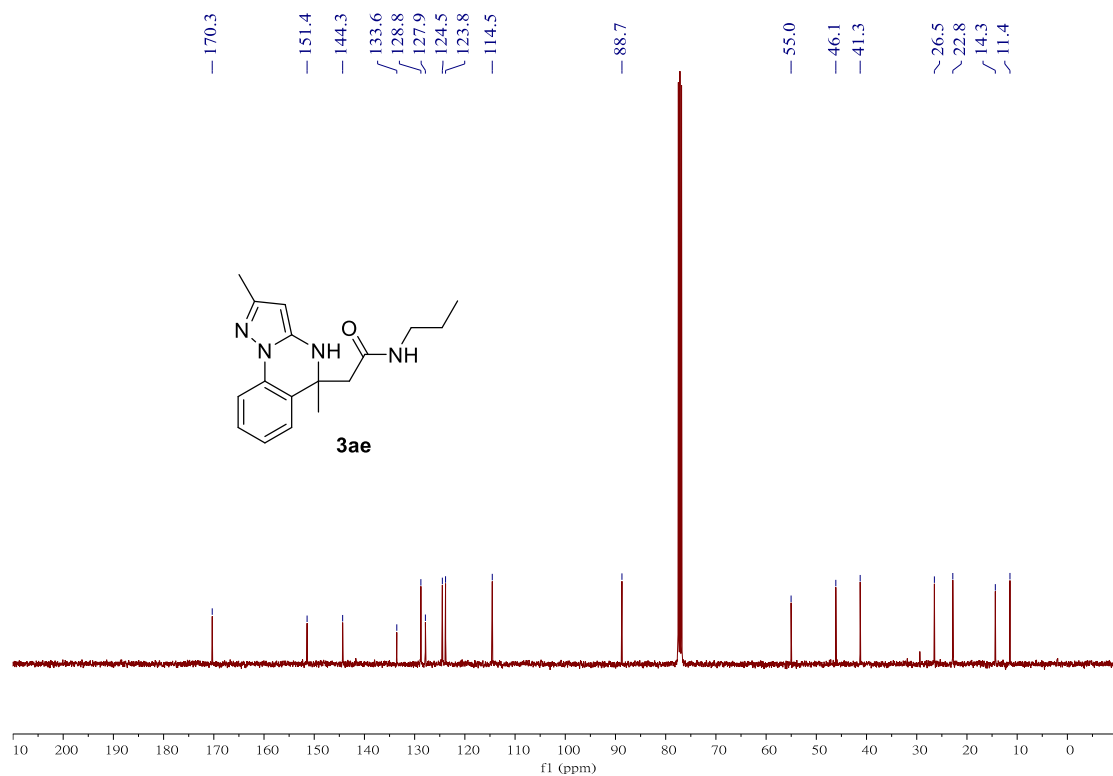

<sup>13</sup>C{<sup>1</sup>H} spectrum (101 MHz) of compound **3ae** in CDCl<sub>3</sub>

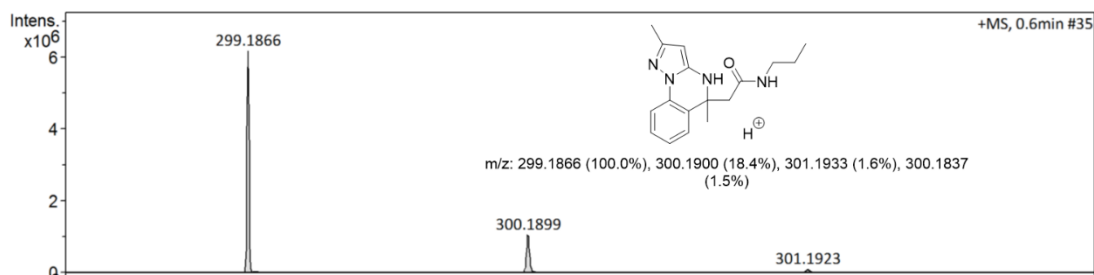

### Display Report

| Meas. m/z | # | Ion Formula | m/z      | err [ppm] | mSigma | # Sigma | Score  | rdb | e <sup>-</sup> Conf | N-Rule | Adduct |
|-----------|---|-------------|----------|-----------|--------|---------|--------|-----|---------------------|--------|--------|
| 299.1866  | 1 | C17H23N4O   | 299.1866 | -0.0      | 17.7   | 1       | 100.00 | 8.5 | even                | ok     | M+H    |

### HRMS Mass (ESI) spectrum of compound 3ae

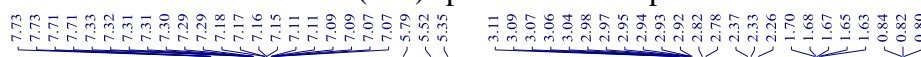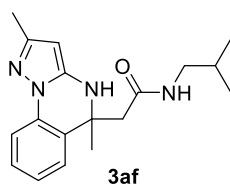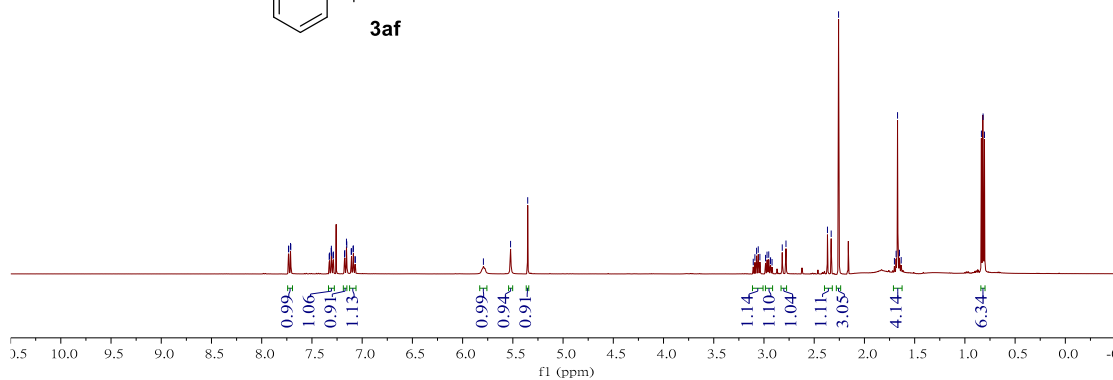

<sup>1</sup>H spectrum (400 MHz) of compound **3af** in CDCl<sub>3</sub>

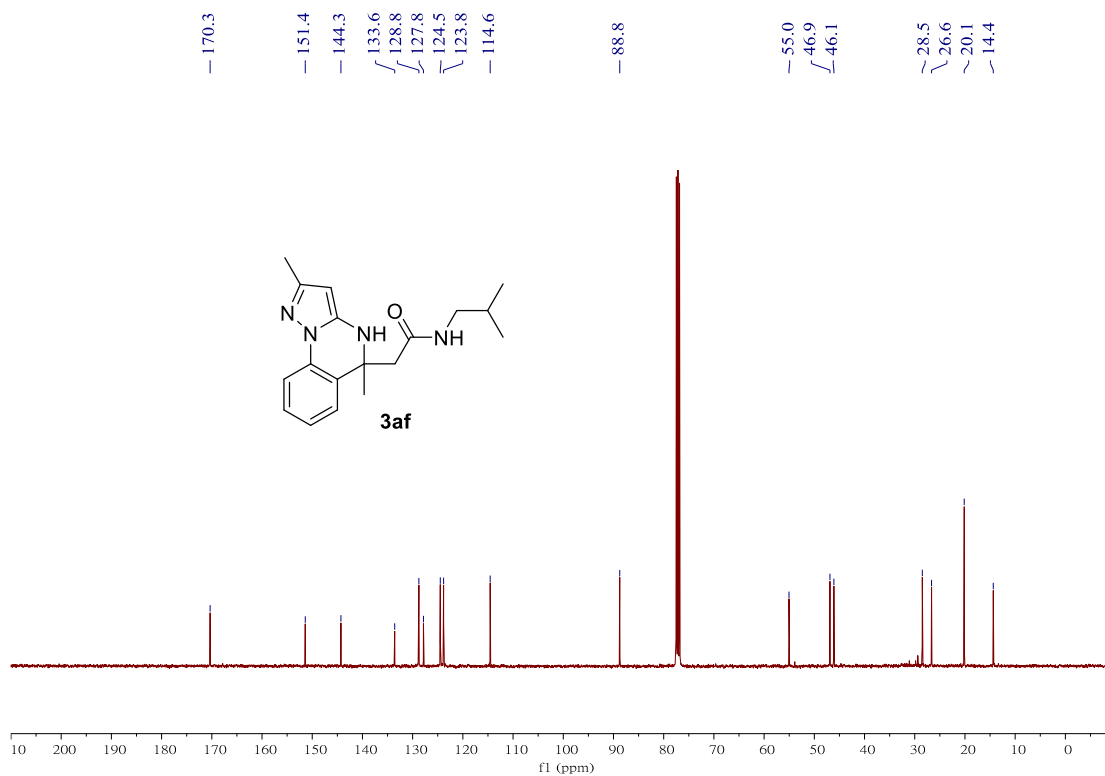

<sup>13</sup>C {1 H} spectrum (101 MHz) of compound **3af** in CDCl<sub>3</sub>

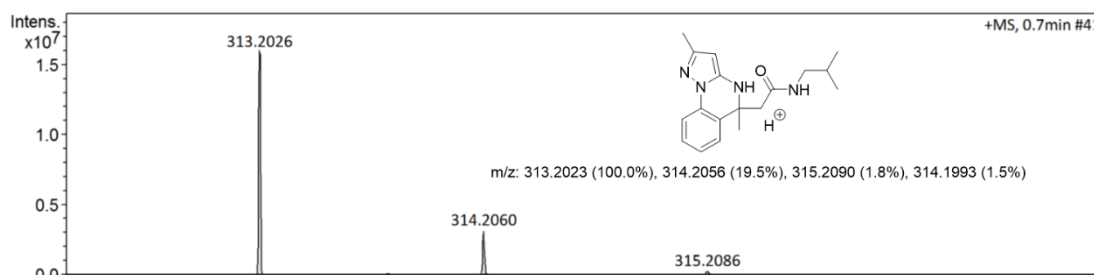

### Display Report

| Meas. m/z | # | Ion Formula                                      | m/z      | err [ppm] | mSigma | # Sigma | Score  | rdb | e <sup>-</sup> Conf | N-Rule | Adduct |
|-----------|---|--------------------------------------------------|----------|-----------|--------|---------|--------|-----|---------------------|--------|--------|
| 313.2026  | 1 | C <sub>18</sub> H <sub>25</sub> N <sub>4</sub> O | 313.2023 | 1.1       | 9.5    | 1       | 100.00 | 8.5 | even                | ok     | M+H    |

HRMS Mass (ESI) spectrum of compound **3af**

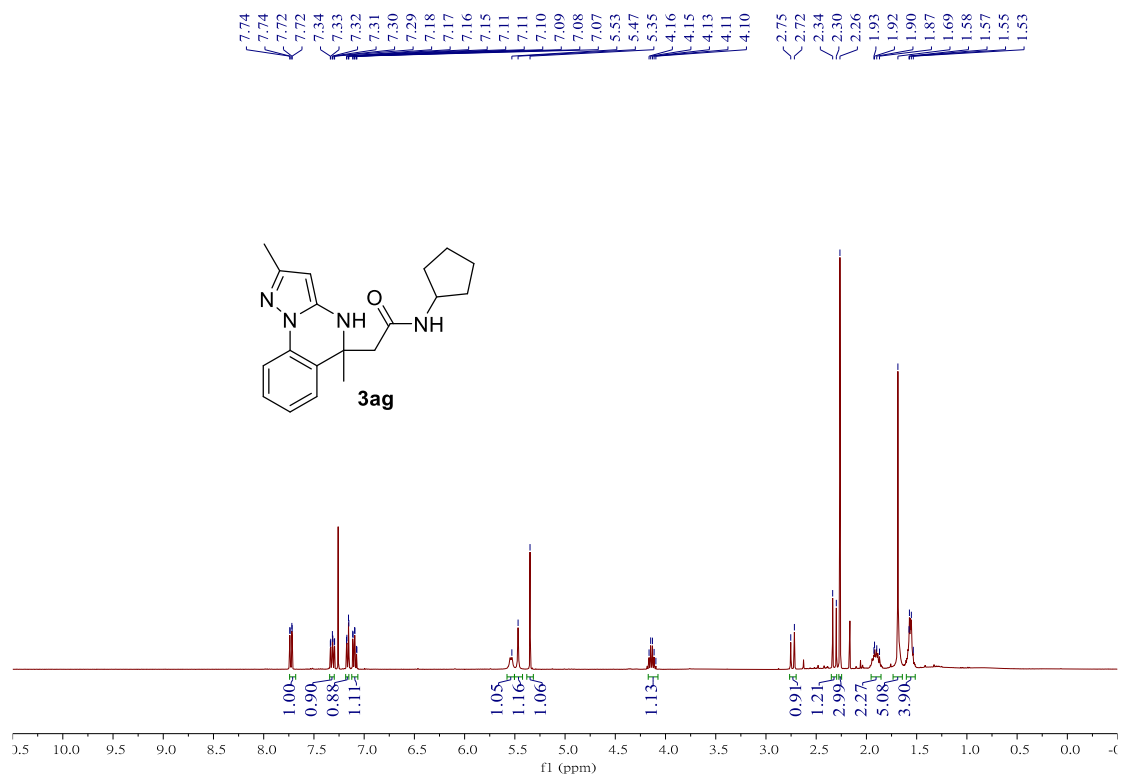

**<sup>1</sup>H spectrum (400 MHz) of compound 3ag in CDCl<sub>3</sub>**

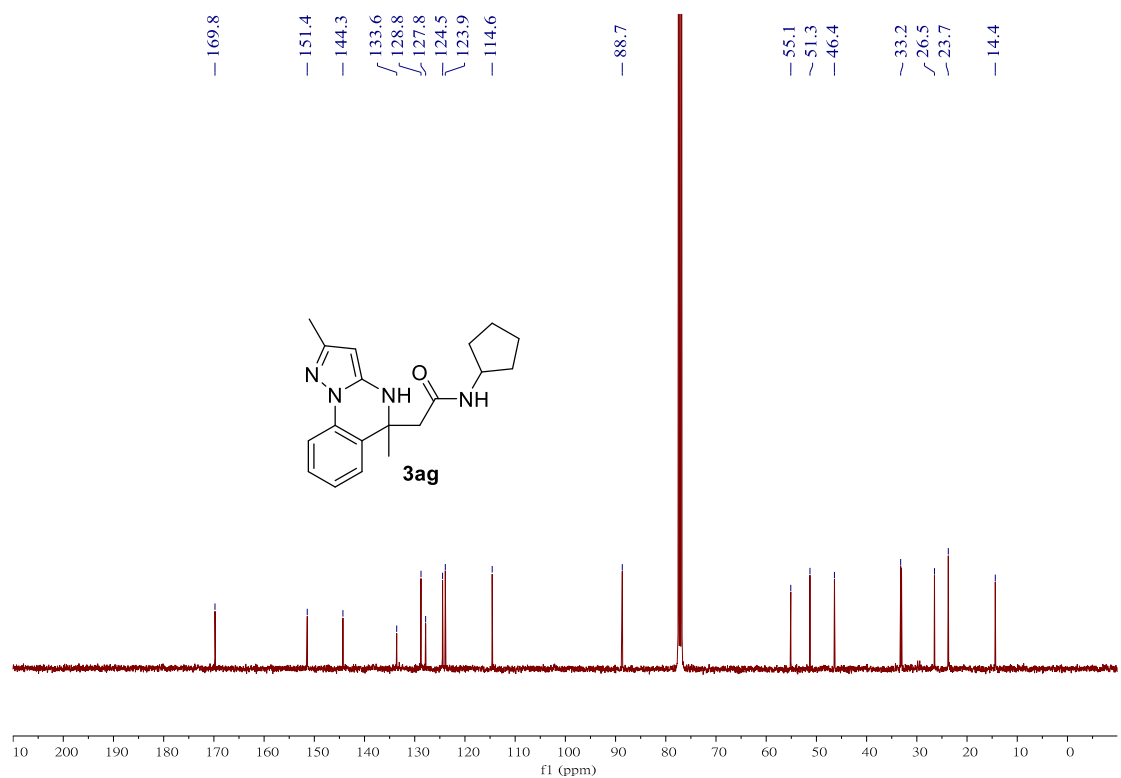

**<sup>13</sup>C {<sup>1</sup>H} spectrum (101 MHz) of compound 3ag in CDCl<sub>3</sub>**



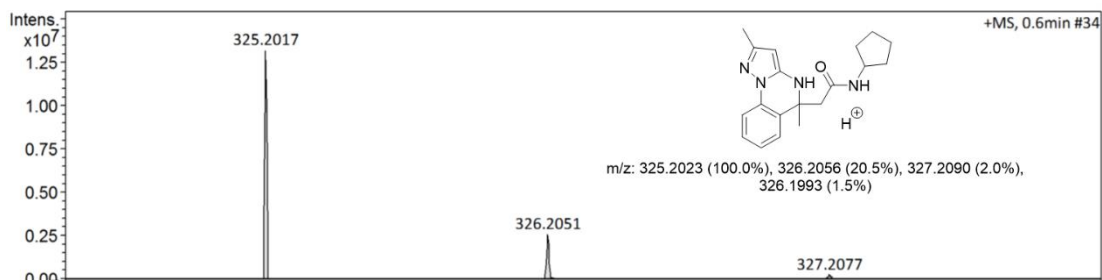

### Display Report

| Meas. m/z | # | Ion Formula | m/z      | err [ppm] | mSigma | # Sigma | Score  | rdb | e <sup>-</sup> Conf | N-Rule | Adduct |
|-----------|---|-------------|----------|-----------|--------|---------|--------|-----|---------------------|--------|--------|
| 325.2017  | 1 | C19H25N4O   | 325.2023 | -1.9      | 16.9   | 1       | 100.00 | 9.5 | even                | ok     | M+H    |

### HRMS Mass (ESI) spectrum of compound 3ag

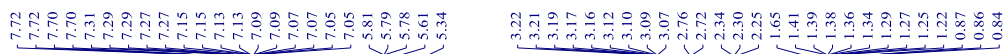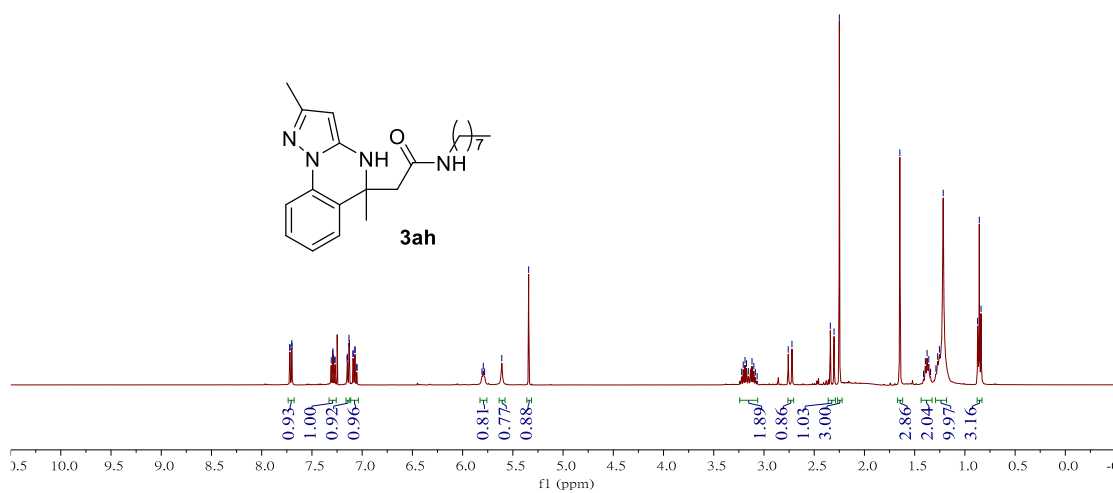

<sup>1</sup>H spectrum (400 MHz) of compound 3ah in CDCl<sub>3</sub>

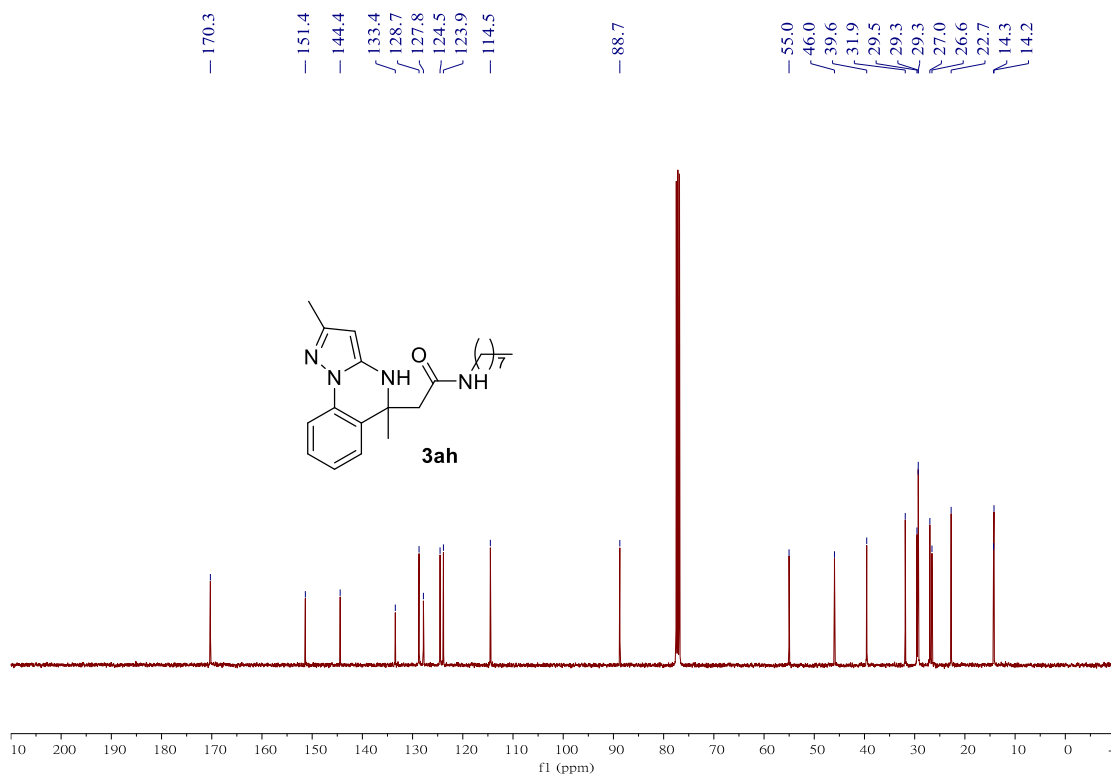

$^{13}\text{C}\{^1\text{H}\}$  spectrum (101 MHz) of compound **3ah** in  $\text{CDCl}_3$

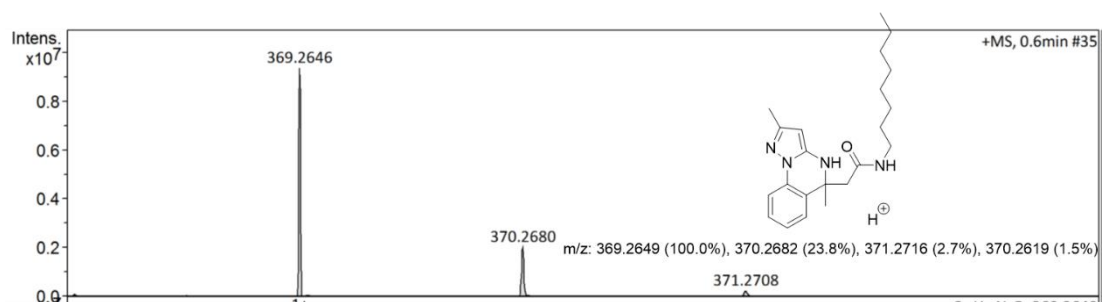

### Display Report

| Meas. m/z | # | Ion Formula                                      | m/z      | err [ppm] | mSigma | # Sigma | Score  | rdb | e <sup>-</sup> Conf | N-Rule | Adduct |
|-----------|---|--------------------------------------------------|----------|-----------|--------|---------|--------|-----|---------------------|--------|--------|
| 369.2646  | 1 | C <sub>22</sub> H <sub>33</sub> N <sub>4</sub> O | 369.2649 | 0.8       | 24.4   | 1       | 100.00 | 8.5 | even                | ok     | M+H    |

HRMS Mass (ESI) spectrum of compound **3ah**

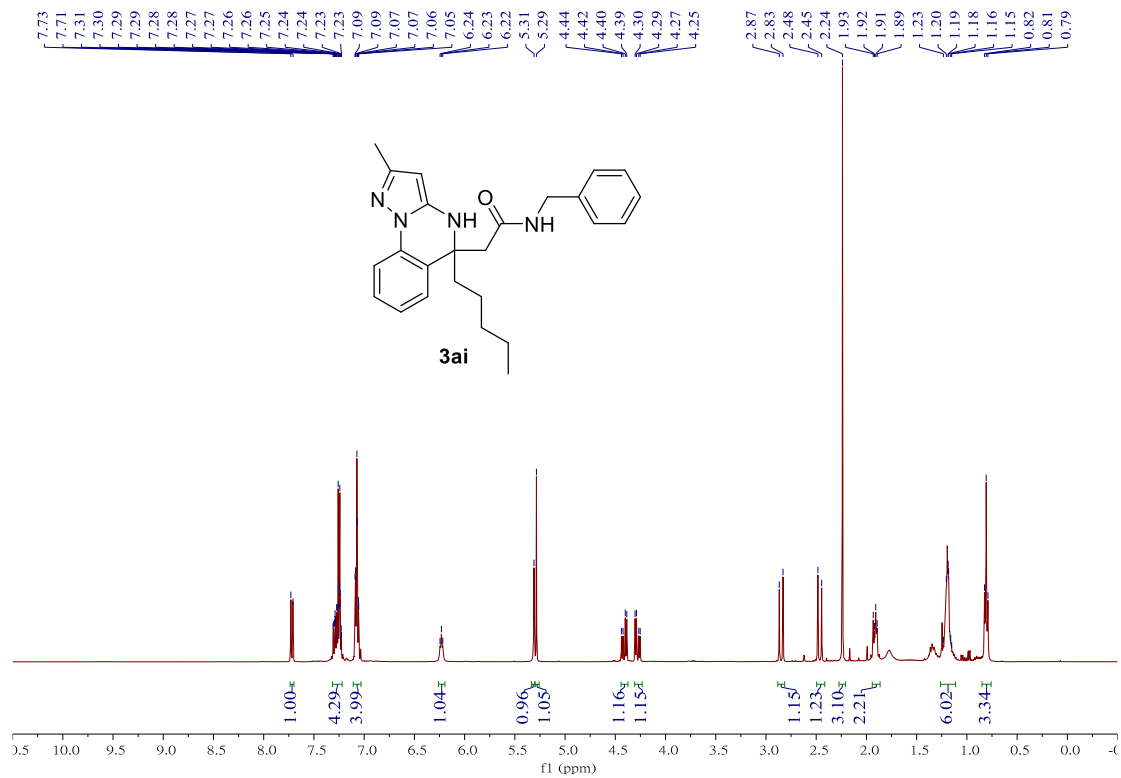

**1H spectrum (400 MHz) of compound **3ai** in CDCl<sub>3</sub>**

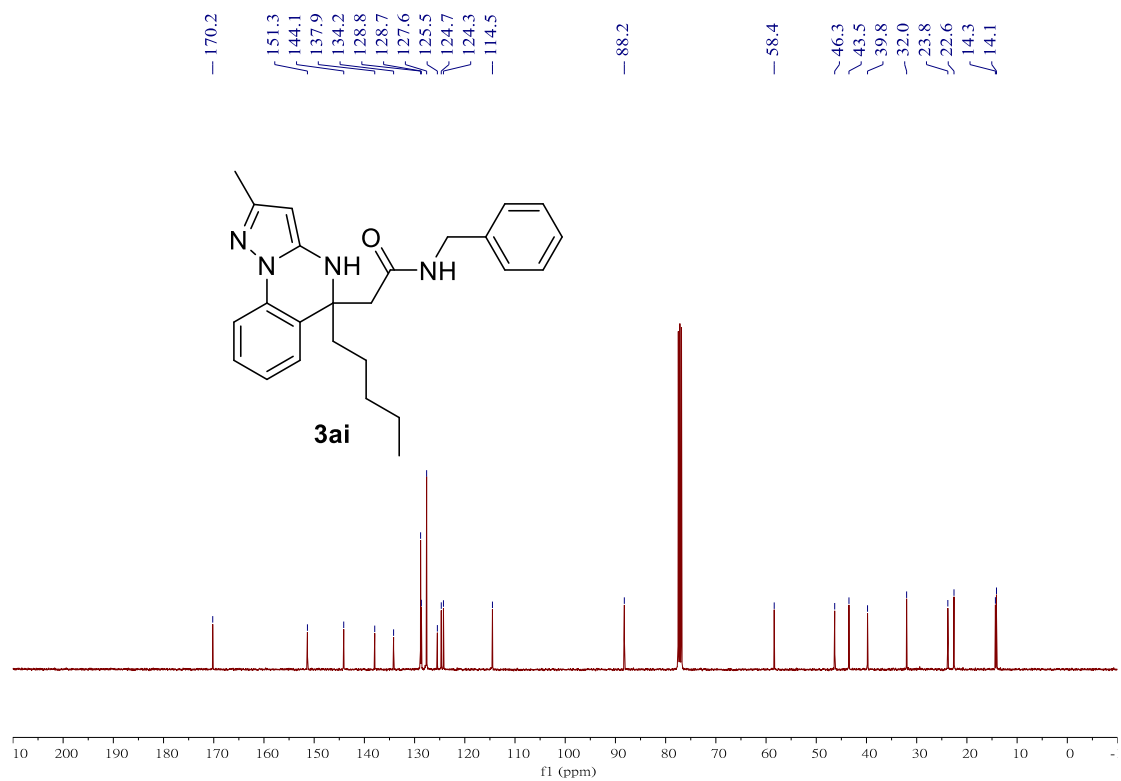

**<sup>13</sup>C {1 H} spectrum (101 MHz) of compound **3ai** in CDCl<sub>3</sub>**

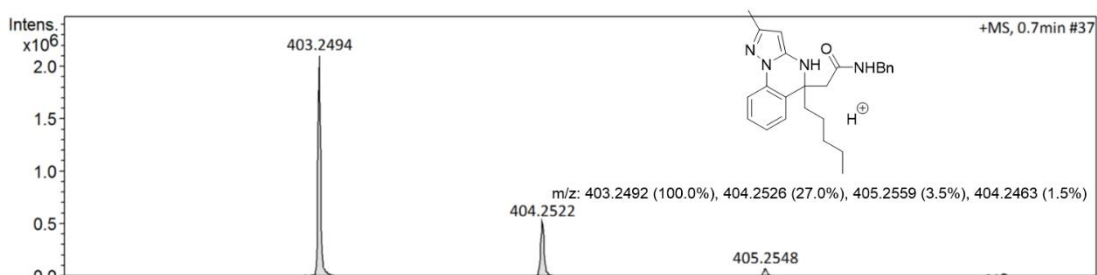

### Display Report

| Meas. m/z | # | Ion Formula                                      | m/z      | err [ppm] | mSigma | # Sigma | Score  | rdb  | e <sup>-</sup> Conf | N-Rule | Adduct |
|-----------|---|--------------------------------------------------|----------|-----------|--------|---------|--------|------|---------------------|--------|--------|
| 403.2494  | 1 | C <sub>25</sub> H <sub>31</sub> N <sub>4</sub> O | 403.2492 | -0.4      | 20.3   | 1       | 100.00 | 12.5 | even                | ok     | M+H    |

### HRMS Mass (ESI) spectrum of compound **3ai**

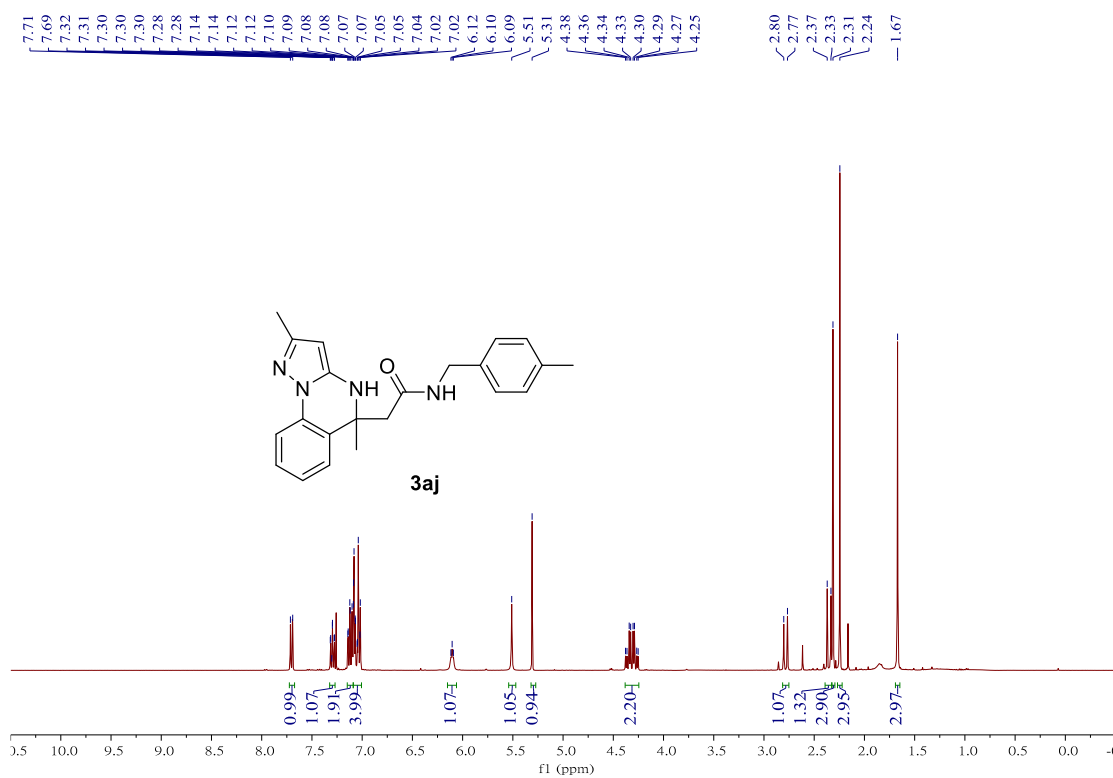

### <sup>1</sup>H spectrum (400 MHz) of compound **3aj** in CDCl<sub>3</sub>

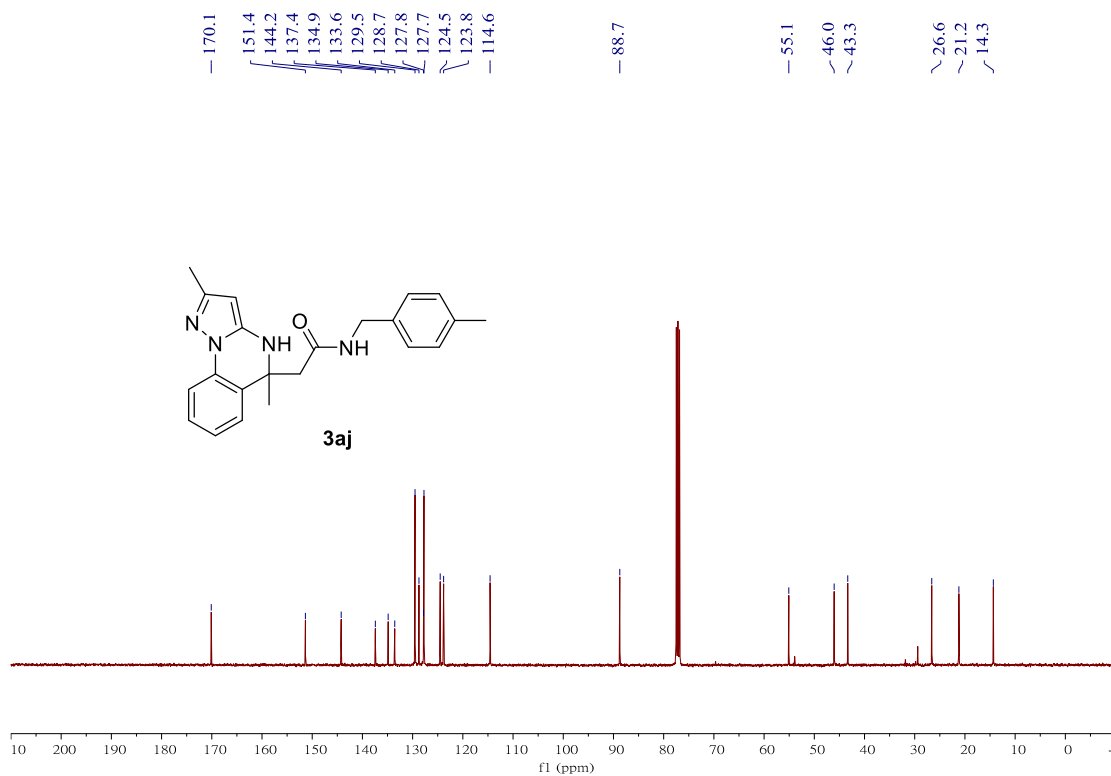

$^{13}\text{C}\{1\text{H}\}$  spectrum (101 MHz) of compound **3aj** in  $\text{CDCl}_3$

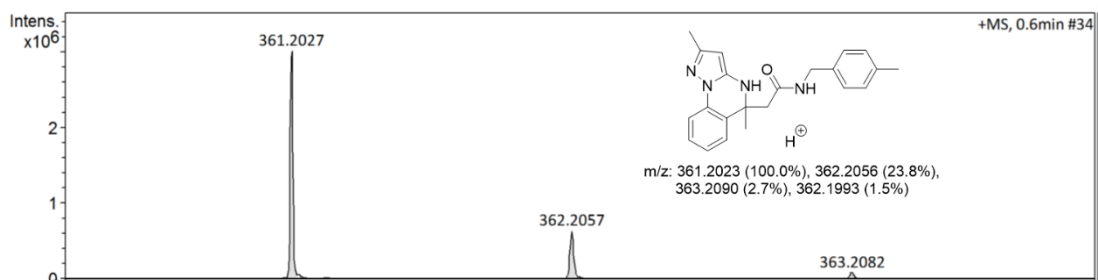

### Display Report

| Meas. $m/z$ | # | Ion Formula                                    | $m/z$    | err [ppm] | mSigma | # Sigma | Score  | rdB  | $e^-$ Conf | N-Rule | Adduct |
|-------------|---|------------------------------------------------|----------|-----------|--------|---------|--------|------|------------|--------|--------|
| 361.2027    | 1 | $\text{C}_{22}\text{H}_{25}\text{N}_4\text{O}$ | 361.2023 | 1.1       | 25.6   | 1       | 100.00 | 12.5 | even       | ok     | M+H    |

HRMS Mass (ESI) spectrum of compound **3aj**

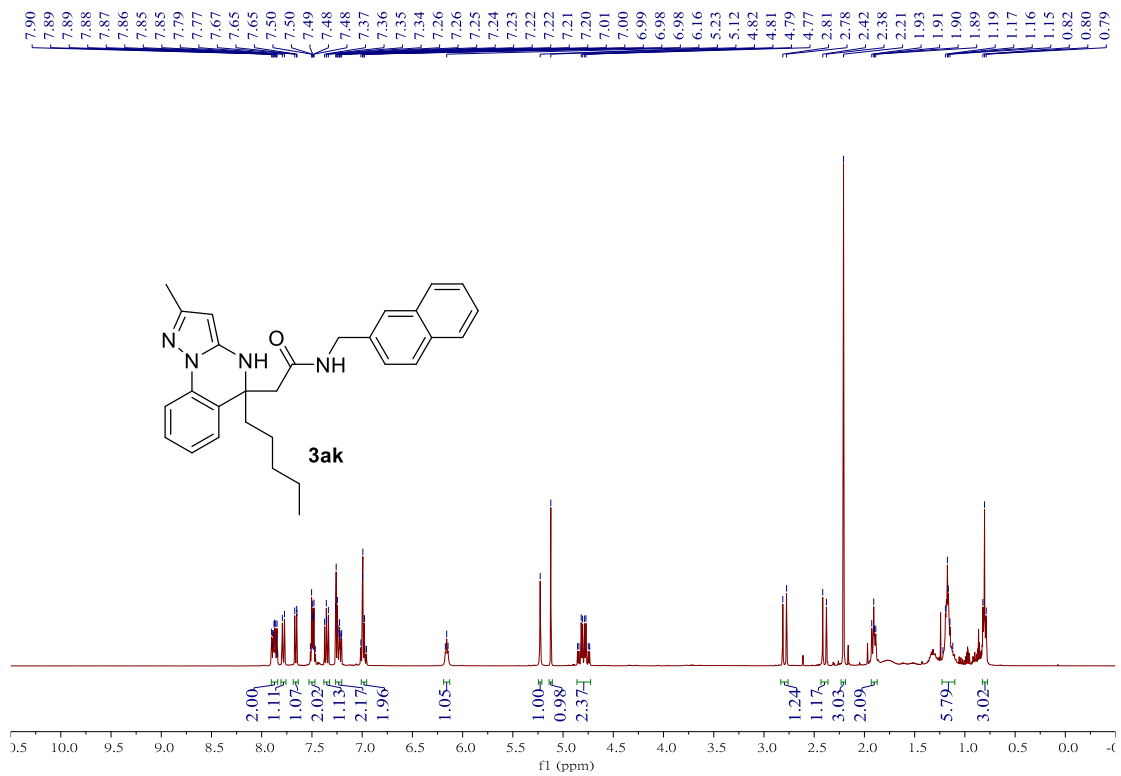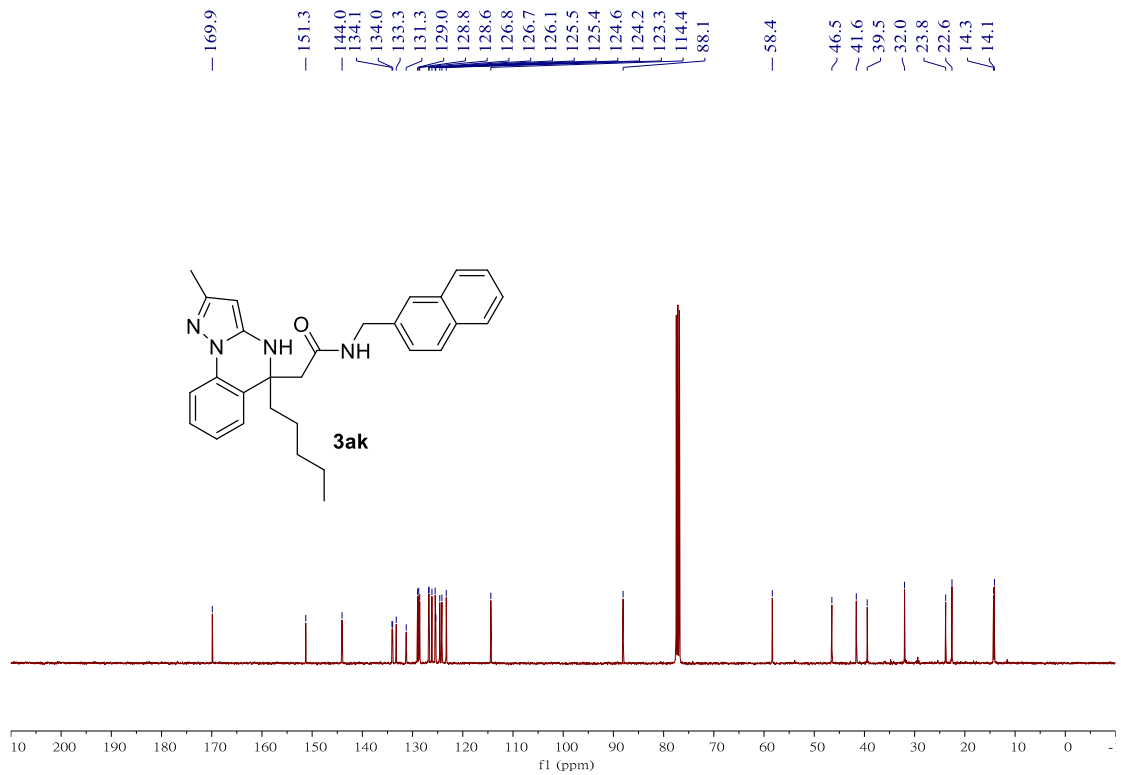

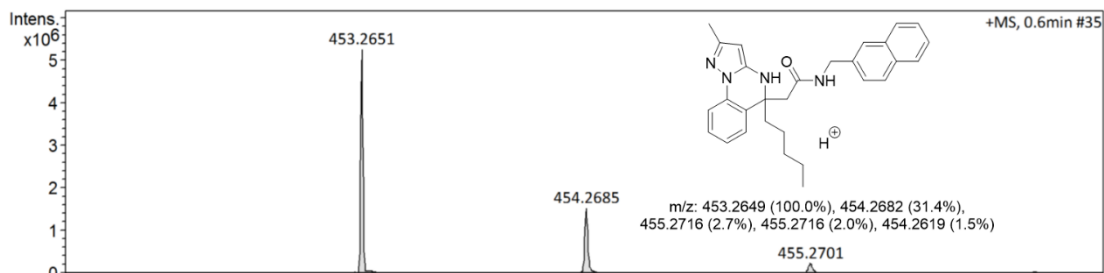

### Display Report

| Meas. m/z | # | Ion Formula                                      | m/z      | err [ppm] | mSigma | # Sigma | Score  | rdb  | e <sup>-</sup> Conf | N-Rule | Adduct |
|-----------|---|--------------------------------------------------|----------|-----------|--------|---------|--------|------|---------------------|--------|--------|
| 453.2651  | 1 | C <sub>29</sub> H <sub>33</sub> N <sub>4</sub> O | 453.2649 | 0.6       | 22.4   | 1       | 100.00 | 15.5 | even                | ok     | M+H    |

### HRMS Mass (ESI) spectrum of compound **3ak**

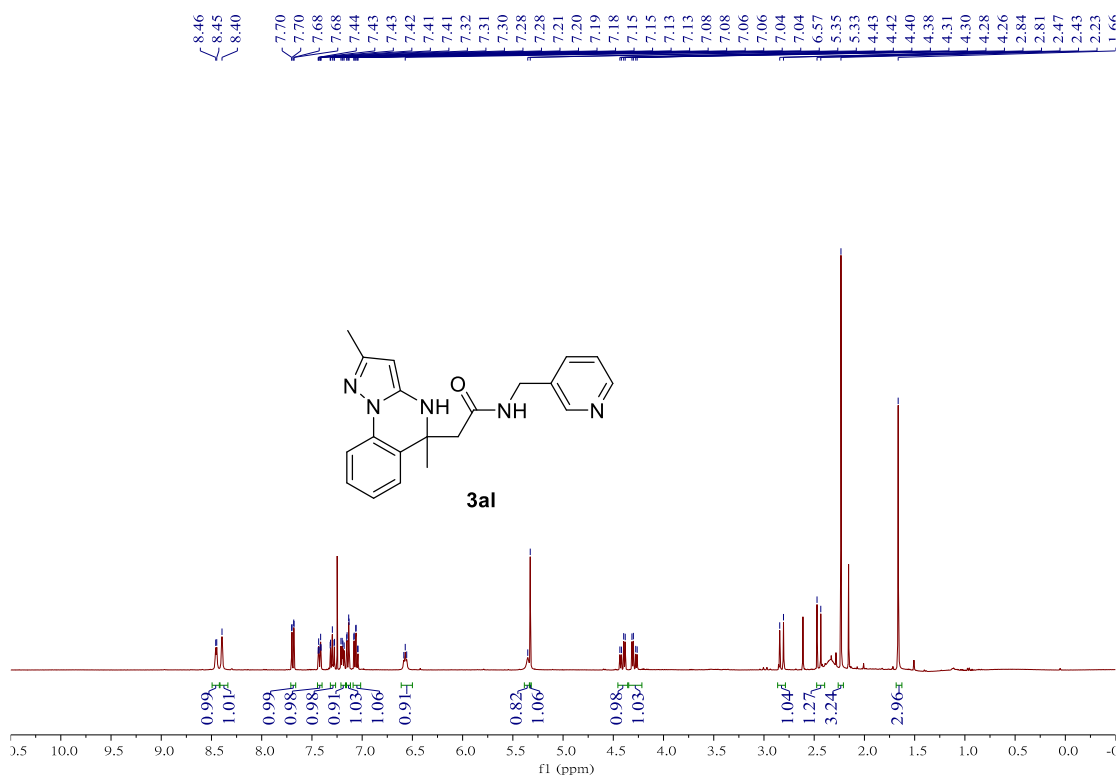

<sup>1</sup>H spectrum (400 MHz) of compound **3al** in CDCl<sub>3</sub>

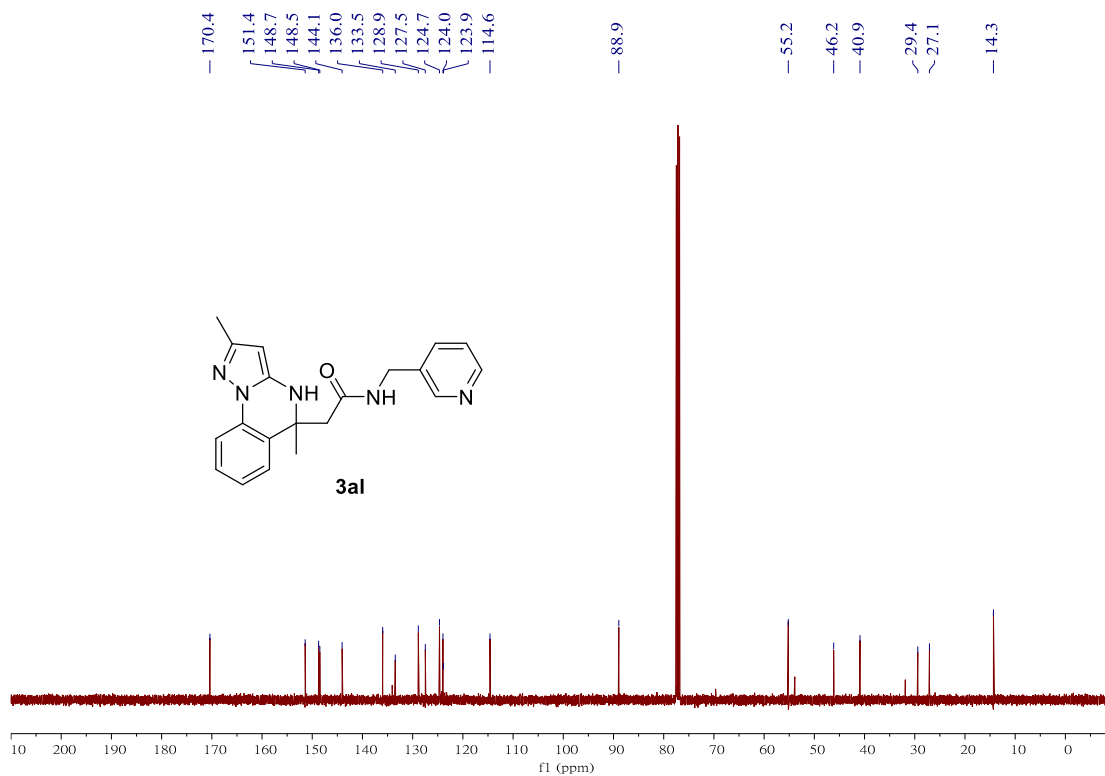

$^{13}\text{C}\{^1\text{H}\}$  spectrum (101 MHz) of compound **3al** in  $\text{CDCl}_3$

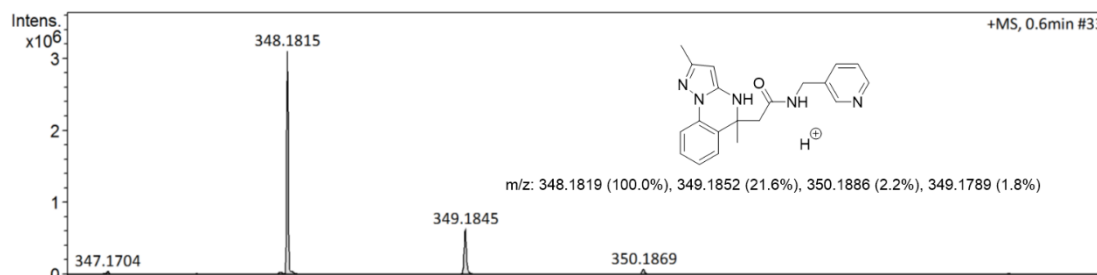

### Display Report

| Meas. m/z | # | Ion Formula                                      | m/z      | err [ppm] | mSigma | # Sigma | Score  | rdb  | e <sup>-</sup> Conf | N-Rule | Adduct |
|-----------|---|--------------------------------------------------|----------|-----------|--------|---------|--------|------|---------------------|--------|--------|
| 348.1815  | 1 | C <sub>20</sub> H <sub>22</sub> N <sub>5</sub> O | 348.1819 | -1.2      | 19.8   | 1       | 100.00 | 12.5 | even                | ok     | M+H    |

HRMS Mass (ESI) spectrum of compound **3al**

## 9. X-Ray Crystallographic Data

X-ray single crystallographic data of the compounds **3aa**



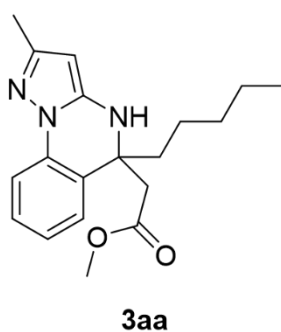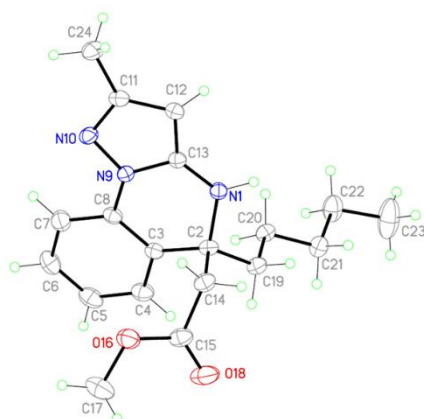

CCDC 2247902

**Table 1 Crystal data and structure refinement for 230307lt\_auto.**

|                                    |                                                               |
|------------------------------------|---------------------------------------------------------------|
| Identification code                | 230307lt_auto                                                 |
| Empirical formula                  | C <sub>19</sub> H <sub>26</sub> N <sub>3</sub> O <sub>2</sub> |
| Formula weight                     | 328.43                                                        |
| Temperature/K                      | 103(6)                                                        |
| Crystal system                     | monoclinic                                                    |
| Space group                        | Ia                                                            |
| a/Å                                | 10.83365(16)                                                  |
| b/Å                                | 14.19083(19)                                                  |
| c/Å                                | 11.90925(15)                                                  |
| α/°                                | 90                                                            |
| β/°                                | 97.2955(13)                                                   |
| γ/°                                | 90                                                            |
| Volume/Å <sup>3</sup>              | 1816.09(4)                                                    |
| Z                                  | 4                                                             |
| ρ <sub>calc</sub> /cm <sup>3</sup> | 1.201                                                         |
| μ/mm <sup>-1</sup>                 | 0.628                                                         |
| F(000)                             | 708.0                                                         |
| Crystal size/mm <sup>3</sup>       | 0.16 × 0.14 × 0.04                                            |
| Radiation                          | Cu Kα (λ = 1.54184)                                           |
| 2θ range for data collection/°     | 9.742 to 134.12                                               |
| Index ranges                       | -12 ≤ h ≤ 12, -16 ≤ k ≤ 16, -14 ≤ l ≤ 13                      |
| Reflections collected              | 13765                                                         |
| Independent reflections            | 2734 [R <sub>int</sub> = 0.0243, R <sub>sigma</sub> = 0.0199] |

|                                                |                                  |
|------------------------------------------------|----------------------------------|
| Data/restraints/parameters                     | 2734/2/221                       |
| Goodness-of-fit on $F^2$                       | 1.056                            |
| Final R indexes [ $I \geq 2\sigma(I)$ ]        | $R_1 = 0.0290$ , $wR_2 = 0.0785$ |
| Final R indexes [all data]                     | $R_1 = 0.0296$ , $wR_2 = 0.0790$ |
| Largest diff. peak/hole / $e \text{ \AA}^{-3}$ | 0.18/-0.37                       |
| Flack parameter                                | -0.04(11)                        |

**Table 2 Fractional Atomic Coordinates ( $\times 10^4$ ) and Equivalent Isotropic Displacement Parameters ( $\text{\AA}^2 \times 10^3$ ) for 230307lt\_auto.  $U_{eq}$  is defined as 1/3 of the trace of the orthogonalised  $U_{ij}$  tensor.**

| Atom | $x$        | $y$        | $z$        | $U(eq)$  |
|------|------------|------------|------------|----------|
| C2   | 5248.5(19) | 3236.2(14) | 4710.9(19) | 20.4(4)  |
| C3   | 5349.6(18) | 3958.4(14) | 3775.4(18) | 19.8(4)  |
| C4   | 6199(2)    | 4702.8(15) | 3904(2)    | 25.7(5)  |
| C5   | 6372(2)    | 5277.5(16) | 2991(2)    | 30.1(5)  |
| C6   | 5695(2)    | 5127.1(16) | 1946(2)    | 32.4(5)  |
| C7   | 4820(2)    | 4402.4(16) | 1799(2)    | 27.2(5)  |
| C8   | 4658.9(18) | 3830.0(14) | 2711.0(19) | 20.0(4)  |
| C11  | 2195.4(19) | 2289.0(15) | 1928.0(19) | 22.4(5)  |
| C12  | 2374.7(19) | 2111.3(14) | 3103.1(19) | 20.4(4)  |
| C13  | 3398.0(18) | 2646.2(14) | 3511.4(18) | 18.2(4)  |
| C14  | 6195(2)    | 2418.4(15) | 4573(2)    | 24.8(5)  |
| C15  | 7469(2)    | 2782.1(15) | 4417(2)    | 27.5(5)  |
| C17  | 8787(2)    | 3185(2)    | 3049(3)    | 45.1(7)  |
| C19  | 5473.2(19) | 3647.2(15) | 5903.4(19) | 22.7(5)  |
| C20  | 4563.3(18) | 4425.4(14) | 6140.7(19) | 21.7(4)  |
| C21  | 4698(2)    | 4696.8(16) | 7383(2)    | 25.4(5)  |
| C22  | 3676(2)    | 5357.7(16) | 7676(2)    | 32.9(6)  |
| C23  | 3731(4)    | 5523(2)    | 8936(3)    | 60.0(10) |
| C24  | 1227(2)    | 1881.2(18) | 1056(2)    | 31.6(5)  |
| N1   | 3985.0(15) | 2836.1(12) | 4558.5(15) | 20.8(4)  |
| N9   | 3783.8(15) | 3093.1(12) | 2605.6(15) | 18.4(4)  |

**Table 2 Fractional Atomic Coordinates ( $\times 10^4$ ) and Equivalent Isotropic Displacement Parameters ( $\text{\AA}^2 \times 10^3$ ) for 230307lt\_auto.  $U_{eq}$  is defined as 1/3 of the trace of the orthogonalised  $U_{ij}$  tensor.**

| Atom | $x$        | $y$        | $z$        | $U(eq)$ |
|------|------------|------------|------------|---------|
| N10  | 3033.7(16) | 2883.5(12) | 1618.0(15) | 21.4(4) |
| O16  | 7635.6(15) | 2769.6(11) | 3316.9(15) | 31.4(4) |
| O18  | 8229.4(16) | 3070.0(14) | 5158.1(17) | 41.6(5) |

**Table 3 Anisotropic Displacement Parameters ( $\text{\AA}^2 \times 10^3$ ) for 230307lt\_auto. The Anisotropic displacement factor exponent takes the form:  $2\pi^2[h^2a^2U_{11}+2hka^*b^*U_{12}+\dots]$ .**

| Atom | $U_{11}$ | $U_{22}$ | $U_{33}$ | $U_{23}$ | $U_{13}$ | $U_{12}$ |
|------|----------|----------|----------|----------|----------|----------|
| C2   | 15.8(9)  | 21.0(10) | 24.0(12) | -1.4(8)  | 0.8(8)   | -0.7(7)  |
| C3   | 16.4(9)  | 20.7(9)  | 22.4(11) | -2.8(8)  | 3.6(8)   | -0.8(8)  |
| C4   | 21.4(10) | 24.9(10) | 30.7(13) | -6.3(9)  | 2.9(9)   | -3.6(8)  |
| C5   | 26.2(11) | 24.8(10) | 40.8(15) | -2.7(10) | 9.6(11)  | -7.8(9)  |
| C6   | 35.5(12) | 27.9(11) | 35.6(14) | 5.9(10)  | 11.7(11) | -5.7(10) |
| C7   | 27.7(12) | 29.0(11) | 25.2(13) | 0.7(9)   | 4.7(10)  | -2.3(9)  |
| C8   | 17.4(9)  | 19.6(9)  | 23.5(11) | -4.4(8)  | 5.0(8)   | -0.9(8)  |
| C11  | 16.7(10) | 23.9(10) | 26.4(12) | -4.7(9)  | 2.0(9)   | 0.3(8)   |
| C12  | 17.9(10) | 20.0(9)  | 23.4(11) | -1.8(8)  | 3.7(9)   | -1.1(7)  |
| C13  | 16.6(9)  | 17.5(9)  | 20.7(11) | -2.0(7)  | 3.1(8)   | 1.3(7)   |
| C14  | 23.3(11) | 23.1(10) | 26.9(12) | -2.6(9)  | -1.2(9)  | 1.0(8)   |
| C15  | 22.0(11) | 27.6(10) | 32.1(13) | -7.0(9)  | 0.1(10)  | 4.7(9)   |
| C17  | 30.0(13) | 51.9(16) | 56(2)    | -5.1(13) | 17.7(14) | -3.9(11) |
| C19  | 20.3(10) | 24.0(10) | 22.8(12) | -1.9(8)  | -0.8(9)  | -0.6(8)  |
| C20  | 21.0(10) | 21.5(10) | 21.8(11) | -0.5(8)  | -0.6(9)  | -1.1(8)  |
| C21  | 28.2(11) | 25.4(10) | 22.3(12) | 0.3(9)   | 1.6(9)   | 2.7(8)   |
| C22  | 44.8(14) | 28.1(11) | 26.5(13) | 3.7(9)   | 7.9(11)  | 10.6(10) |
| C23  | 99(3)    | 54.0(17) | 29.8(16) | 6.4(13)  | 18.2(17) | 38.4(18) |
| C24  | 25.6(12) | 41.0(13) | 26.8(13) | -6.7(10) | -2.2(10) | -7.1(10) |
| N1   | 19.4(9)  | 24.8(8)  | 18.2(10) | -0.6(7)  | 2.6(7)   | -6.7(7)  |
| N9   | 16.7(8)  | 21.0(8)  | 17.5(9)  | -0.8(7)  | 1.5(7)   | -2.0(6)  |
| N10  | 21.0(9)  | 26.7(9)  | 16.2(9)  | -2.8(7)  | 0.5(7)   | -1.1(7)  |

**Table 3 Anisotropic Displacement Parameters ( $\text{\AA}^2 \times 10^3$ ) for 230307lt\_auto. The Anisotropic displacement factor exponent takes the form:  $2\pi^2[h^2a^2U_{11}+2hka*b*U_{12}+\dots]$ .**

| Atom | $U_{11}$ | $U_{22}$ | $U_{33}$ | $U_{23}$ | $U_{13}$ | $U_{12}$ |
|------|----------|----------|----------|----------|----------|----------|
| O16  | 23.0(8)  | 37.2(9)  | 34.5(10) | -4.1(8)  | 5.3(7)   | -0.9(7)  |
| O18  | 23.0(8)  | 57.2(11) | 42.8(12) | -18.3(9) | -3.0(8)  | 1.6(8)   |

**Table 4 Bond Lengths for 230307lt\_auto.**

| Atom | Atom | Length/ $\text{\AA}$ | Atom | Atom | Length/ $\text{\AA}$ |
|------|------|----------------------|------|------|----------------------|
| C2   | C3   | 1.528(3)             | C11  | N10  | 1.326(3)             |
| C2   | C14  | 1.571(3)             | C12  | C13  | 1.380(3)             |
| C2   | C19  | 1.526(3)             | C13  | N1   | 1.353(3)             |
| C2   | N1   | 1.472(3)             | C13  | N9   | 1.362(3)             |
| C3   | C4   | 1.396(3)             | C14  | C15  | 1.508(3)             |
| C3   | C8   | 1.400(3)             | C15  | O16  | 1.345(3)             |
| C4   | C5   | 1.391(3)             | C15  | O18  | 1.200(3)             |
| C5   | C6   | 1.378(4)             | C17  | O16  | 1.452(3)             |
| C6   | C7   | 1.395(3)             | C19  | C20  | 1.530(3)             |
| C7   | C8   | 1.385(3)             | C20  | C21  | 1.517(3)             |
| C8   | N9   | 1.406(2)             | C21  | C22  | 1.525(3)             |
| C11  | C12  | 1.411(3)             | C22  | C23  | 1.512(4)             |
| C11  | C24  | 1.496(3)             | N9   | N10  | 1.375(2)             |

**Table 5 Bond Angles for 230307lt\_auto.**

| Atom | Atom | Atom | Angle/ $^\circ$ | Atom | Atom | Atom | Angle/ $^\circ$ |
|------|------|------|-----------------|------|------|------|-----------------|
| C3   | C2   | C14  | 108.15(18)      | C13  | C12  | C11  | 104.74(18)      |
| C19  | C2   | C3   | 113.86(17)      | N1   | C13  | C12  | 134.2(2)        |
| C19  | C2   | C14  | 110.51(17)      | N1   | C13  | N9   | 118.79(17)      |
| N1   | C2   | C3   | 108.69(17)      | N9   | C13  | C12  | 106.90(19)      |
| N1   | C2   | C14  | 108.12(16)      | C15  | C14  | C2   | 112.33(17)      |
| N1   | C2   | C19  | 107.35(17)      | O16  | C15  | C14  | 110.74(19)      |
| C4   | C3   | C2   | 122.3(2)        | O18  | C15  | C14  | 125.4(2)        |
| C4   | C3   | C8   | 117.81(19)      | O18  | C15  | O16  | 123.9(2)        |
| C8   | C3   | C2   | 119.57(17)      | C2   | C19  | C20  | 114.66(17)      |

**Table 5 Bond Angles for 230307lt\_auto.**

| Atom | Atom | Atom | Angle/°    | Atom | Atom | Atom | Angle/°    |
|------|------|------|------------|------|------|------|------------|
| C5   | C4   | C3   | 120.7(2)   | C21  | C20  | C19  | 112.25(17) |
| C6   | C5   | C4   | 120.4(2)   | C20  | C21  | C22  | 113.38(19) |
| C5   | C6   | C7   | 120.2(2)   | C23  | C22  | C21  | 112.6(2)   |
| C8   | C7   | C6   | 119.0(2)   | C13  | N1   | C2   | 120.76(18) |
| C3   | C8   | N9   | 117.03(18) | C13  | N9   | C8   | 123.14(18) |
| C7   | C8   | C3   | 121.86(19) | C13  | N9   | N10  | 111.68(16) |
| C7   | C8   | N9   | 121.11(19) | N10  | N9   | C8   | 123.77(17) |
| C12  | C11  | C24  | 128.0(2)   | C11  | N10  | N9   | 104.53(17) |
| N10  | C11  | C12  | 112.15(18) | C15  | O16  | C17  | 115.7(2)   |
| N10  | C11  | C24  | 119.8(2)   |      |      |      |            |

**Table 6 Torsion Angles for 230307lt\_auto.**

| A  | B   | C   | D   | Angle/°     | A   | B   | C   | D   | Angle/°     |
|----|-----|-----|-----|-------------|-----|-----|-----|-----|-------------|
| C2 | C3  | C4  | C5  | 172.1(2)    | C12 | C13 | N9  | C8  | 168.02(18)  |
| C2 | C3  | C8  | C7  | -172.62(19) | C12 | C13 | N9  | N10 | 1.1(2)      |
| C2 | C3  | C8  | N9  | 7.7(3)      | C13 | N9  | N10 | C11 | -1.1(2)     |
| C2 | C14 | C15 | O16 | -99.8(2)    | C14 | C2  | C3  | C4  | -88.2(2)    |
| C2 | C14 | C15 | O18 | 78.3(3)     | C14 | C2  | C3  | C8  | 85.6(2)     |
| C2 | C19 | C20 | C21 | 170.86(17)  | C14 | C2  | C19 | C20 | -177.67(17) |
| C3 | C2  | C14 | C15 | 47.9(2)     | C14 | C2  | N1  | C13 | -78.3(2)    |
| C3 | C2  | C19 | C20 | 60.4(2)     | C14 | C15 | O16 | C17 | 174.6(2)    |
| C3 | C2  | N1  | C13 | 38.9(2)     | C19 | C2  | C3  | C4  | 35.1(3)     |
| C3 | C4  | C5  | C6  | 0.8(3)      | C19 | C2  | C3  | C8  | -151.16(18) |
| C3 | C8  | N9  | C13 | 14.4(3)     | C19 | C2  | C14 | C15 | -77.4(2)    |
| C3 | C8  | N9  | N10 | 179.66(17)  | C19 | C2  | N1  | C13 | 162.47(17)  |
| C4 | C3  | C8  | C7  | 1.4(3)      | C19 | C20 | C21 | C22 | -171.06(18) |
| C4 | C3  | C8  | N9  | -178.29(18) | C20 | C21 | C22 | C23 | 172.8(2)    |
| C4 | C5  | C6  | C7  | 0.7(4)      | C24 | C11 | C12 | C13 | 178.9(2)    |
| C5 | C6  | C7  | C8  | -1.1(4)     | C24 | C11 | N10 | N9  | -178.34(19) |
| C6 | C7  | C8  | C3  | 0.0(3)      | N1  | C2  | C3  | C4  | 154.68(19)  |
| C6 | C7  | C8  | N9  | 179.7(2)    | N1  | C2  | C3  | C8  | -31.6(3)    |
| C7 | C8  | N9  | C13 | -165.36(19) | N1  | C2  | C14 | C15 | 165.39(19)  |

**Table 6 Torsion Angles for 230307lt\_auto.**

| A   | B   | C   | D   | Angle/°     | A   | B   | C   | D   | Angle/°     |
|-----|-----|-----|-----|-------------|-----|-----|-----|-----|-------------|
| C7  | C8  | N9  | N10 | -0.1(3)     | N1  | C2  | C19 | C20 | -60.0(2)    |
| C8  | C3  | C4  | C5  | -1.8(3)     | N1  | C13 | N9  | C8  | -8.2(3)     |
| C8  | N9  | N10 | C11 | -167.83(18) | N1  | C13 | N9  | N10 | -175.10(17) |
| C11 | C12 | C13 | N1  | 174.7(2)    | N9  | C13 | N1  | C2  | -21.1(3)    |
| C11 | C12 | C13 | N9  | -0.7(2)     | N10 | C11 | C12 | C13 | 0.1(2)      |
| C12 | C11 | N10 | N9  | 0.6(2)      | O18 | C15 | O16 | C17 | -3.6(3)     |
| C12 | C13 | N1  | C2  | 163.9(2)    |     |     |     |     |             |

**Table 7 Hydrogen Atom Coordinates ( $\text{\AA} \times 10^4$ ) and Isotropic Displacement Parameters ( $\text{\AA}^2 \times 10^3$ ) for 230307lt\_auto.**

| Atom | x       | y       | z       | U(eq) |
|------|---------|---------|---------|-------|
| H4   | 6662.9  | 4817.87 | 4622.04 | 31    |
| H5   | 6960.09 | 5776.69 | 3087.83 | 36    |
| H6   | 5825.38 | 5518.05 | 1324.08 | 39    |
| H7   | 4340.92 | 4302.91 | 1083.64 | 33    |
| H12  | 1896.68 | 1711.87 | 3520.91 | 24    |
| H14A | 6261.77 | 2010.65 | 5252.89 | 30    |
| H14B | 5872.99 | 2028.49 | 3910.87 | 30    |
| H17A | 8814.6  | 3149.69 | 2230.41 | 68    |
| H17B | 9495.83 | 2839.91 | 3445.6  | 68    |
| H17C | 8828.85 | 3846    | 3289.01 | 68    |
| H19A | 6329.23 | 3904.01 | 6030.84 | 27    |
| H19B | 5421.14 | 3131.21 | 6454.89 | 27    |
| H20A | 4710.5  | 4987.92 | 5684.36 | 26    |
| H20B | 3701.57 | 4207.45 | 5903.31 | 26    |
| H21A | 5514.95 | 5005.88 | 7586.46 | 31    |
| H21B | 4687.77 | 4117.31 | 7844.13 | 31    |
| H22A | 3753.73 | 5969.74 | 7292.45 | 39    |
| H22B | 2855.18 | 5086.08 | 7386.4  | 39    |
| H23A | 3028.09 | 5918.84 | 9083.84 | 90    |
| H23B | 4513.11 | 5840.32 | 9216.85 | 90    |
| H23C | 3687.7  | 4917.17 | 9324.02 | 90    |

**Table 7 Hydrogen Atom Coordinates ( $\text{\AA} \times 10^4$ ) and Isotropic Displacement Parameters ( $\text{\AA}^2 \times 10^3$ ) for 230307lt\_auto.**

| Atom | x       | y       | z       | U(eq) |
|------|---------|---------|---------|-------|
| H24A | 403.13  | 2106.64 | 1190.27 | 47    |
| H24B | 1250.51 | 1192.01 | 1105.66 | 47    |
| H24C | 1392.13 | 2077.93 | 300.43  | 47    |
| H1   | 3606.96 | 2718.9  | 5155.24 | 25    |
| H10  | 3095.88 | 3096.18 | 933.36  | 26    |

### Experimental

Single crystals of  $\text{C}_{19}\text{H}_{26}\text{N}_3\text{O}_2$  [230307lt\_auto] were [ ]. A suitable crystal was selected and [ ] on a XtaLAB Synergy R, DW system, HyPix-Arc 150 diffractometer. The crystal was kept at 103(6) K during data collection. Using Olex2 [1], the structure was solved with the SHELXT [2] structure solution program using Intrinsic Phasing and refined with the SHELXL [3] refinement package using Least Squares minimisation.

1. Dolomanov, O.V., Bourhis, L.J., Gildea, R.J, Howard, J.A.K. & Puschmann, H. (2009), J. Appl. Cryst. 42, 339-341.
2. Sheldrick, G.M. (2015). Acta Cryst. A71, 3-8.
3. Sheldrick, G.M. (2015). Acta Cryst. C71, 3-8.

### Crystal structure determination of [230307lt\_auto]

**Crystal Data** for  $\text{C}_{19}\text{H}_{26}\text{N}_3\text{O}_2$  ( $M=328.43$  g/mol): monoclinic, space group Ia (no. 9),  $a = 10.83365(16)$  Å,  $b = 14.19083(19)$  Å,  $c = 11.90925(15)$  Å,  $\beta = 97.2955(13)^\circ$ ,  $V = 1816.09(4)$  Å<sup>3</sup>,  $Z = 4$ ,  $T = 103(6)$  K,  $\mu(\text{Cu K}\alpha) = 0.628$  mm<sup>-1</sup>,  $D_{\text{calc}} = 1.201$  g/cm<sup>3</sup>, 13765 reflections measured ( $9.742^\circ \leq 2\Theta \leq 134.12^\circ$ ), 2734 unique ( $R_{\text{int}} = 0.0243$ ,  $R_{\text{sigma}} = 0.0199$ ) which were used in all calculations. The final  $R_1$  was 0.0290 ( $I > 2\sigma(I)$ ) and  $wR_2$  was 0.0790 (all data).

### Refinement model description

Number of restraints - 2, number of constraints - unknown.

Details:

#### 1. Fixed Uiso

At 1.2 times of:

All C(H) groups, All C(H,H) groups, All N(H) groups

At 1.5 times of:

All C(H,H,H) groups

#### 2.a Secondary CH2 refined with riding coordinates:

C14(H14A,H14B), C19(H19A,H19B), C20(H20A,H20B), C21(H21A,H21B),  
C22(H22A,H22B)

2.b Aromatic/amide H refined with riding coordinates:

C4(H4), C5(H5), C6(H6), C7(H7), C12(H12), N1(H1), N10(H10)

2.c Idealised Me refined as rotating group:

C17(H17A,H17B,H17C), C23(H23A,H23B,H23C), C24(H24A,H24B,H24C)

This report has been created with Olex2, compiled on 2023.02.24 svn.rf166f9f3 for OlexSys.

Please let us know if there are any errors or if you would like to have additional features.
